# Supplementary material for: Transformation of a Metal Chelate into a “Catch and Anchor” Inhibitor of Botulinum A Protease
Source: MDPI journal article supplement (doi:10.3390/ijms24054303), 2023-02-21

# **Transformation of a Metal Chelate into a “Catch and Anchor” Inhibitor of Botulinum A Protease**

**Lucy Lin, Ealin N. Patel, Alexander L. Nielsen, Lewis D. Turner, William H. Tepp, Kong Nguyen, Sabine Pellett, Kim D. Janda\***

\*Corresponding author: [kdjanda@scripps.edu](mailto:kdjanda@scripps.edu)

**Figure S1.** Cytotoxicity of the PPO compounds

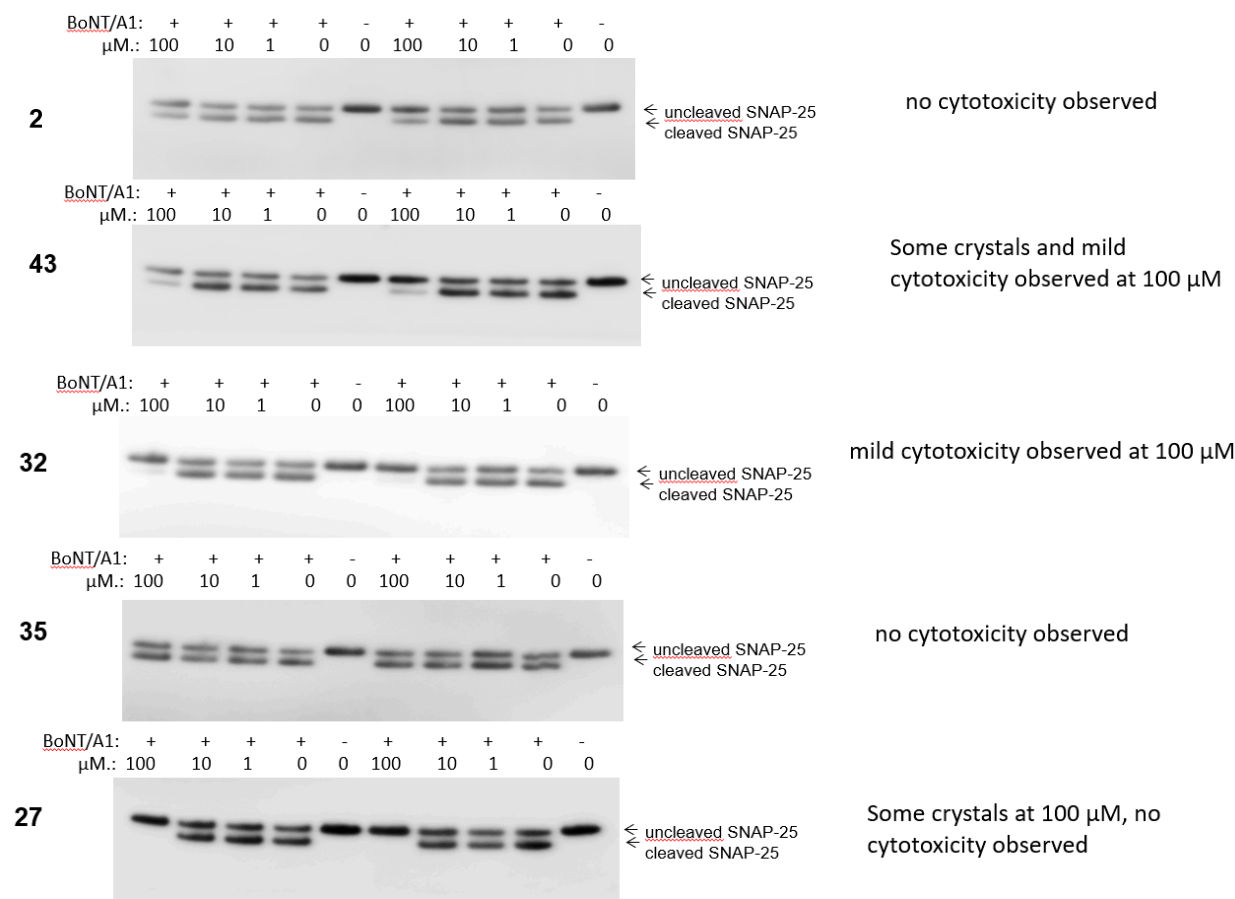

**Figure S2.** Activity Screen of Bifunctional inhibitors

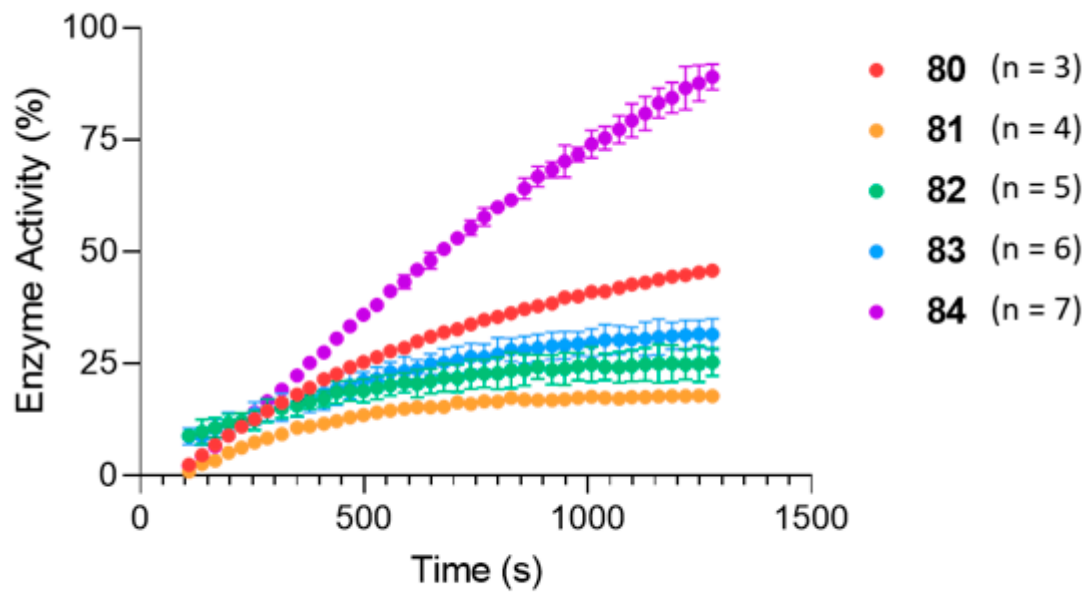

Screened at 4  $\mu$ M against 10 nM BoNT/A-LC, at 37°C

<sup>1</sup>H NMR of **2**

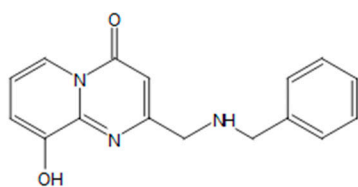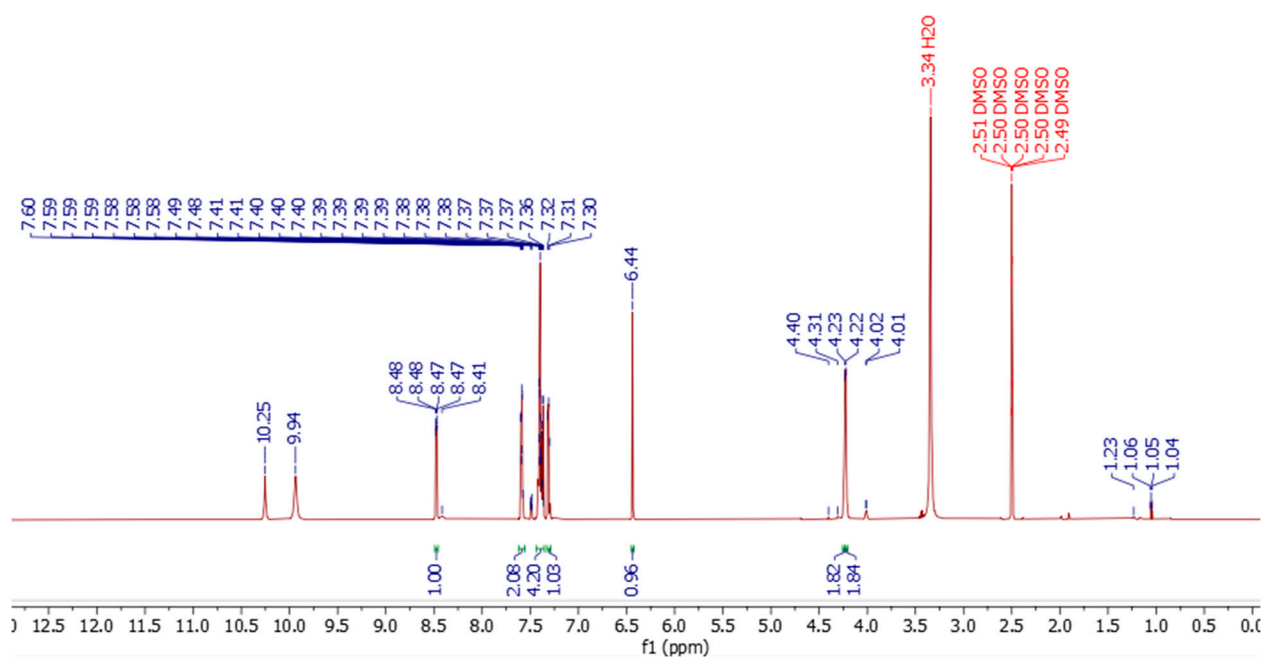



<sup>13</sup>C NMR of **2**

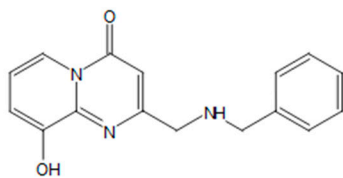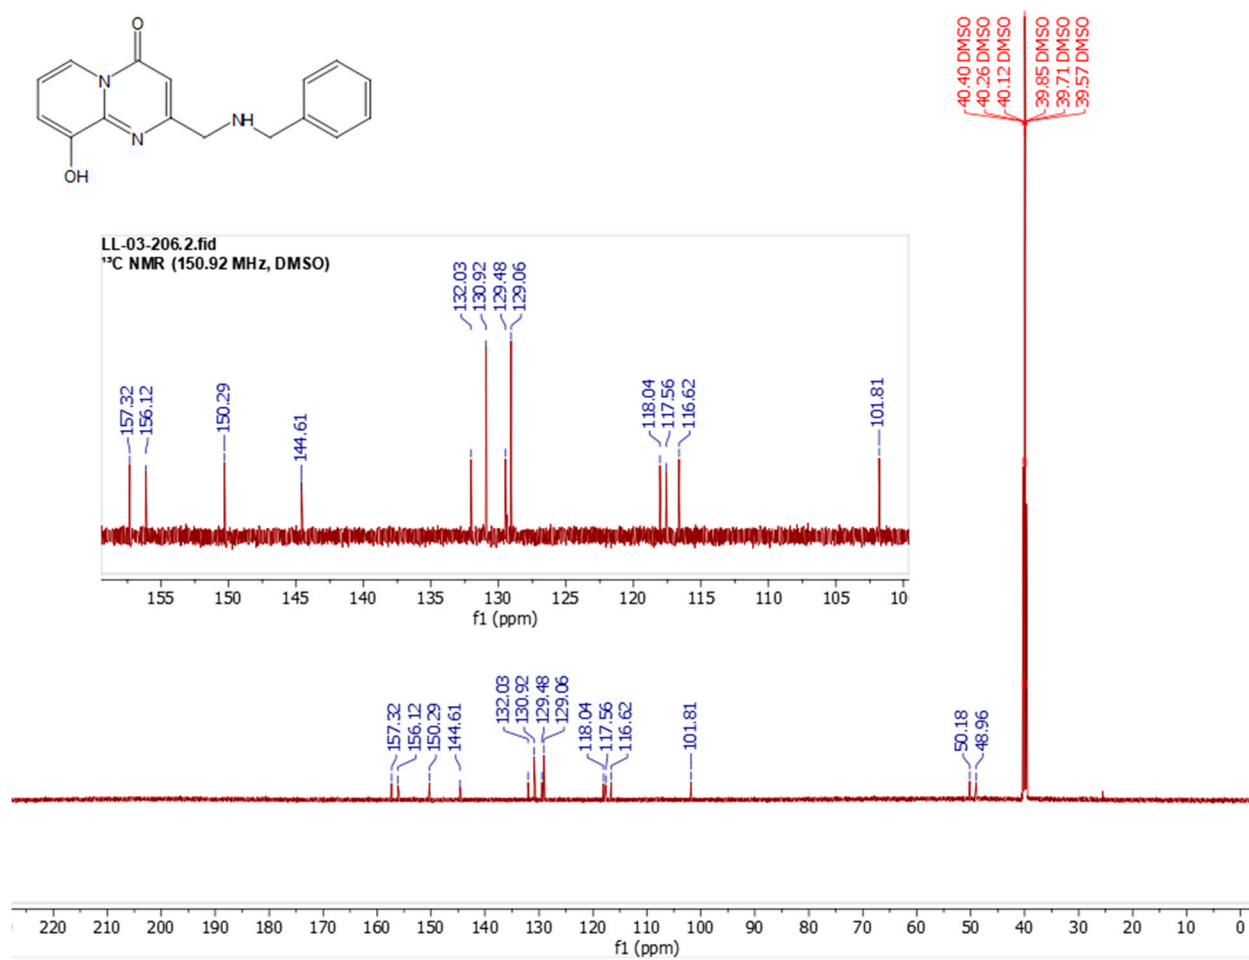

<sup>1</sup>H NMR of 6

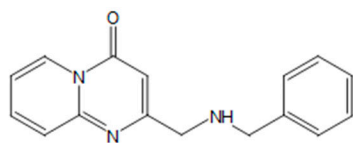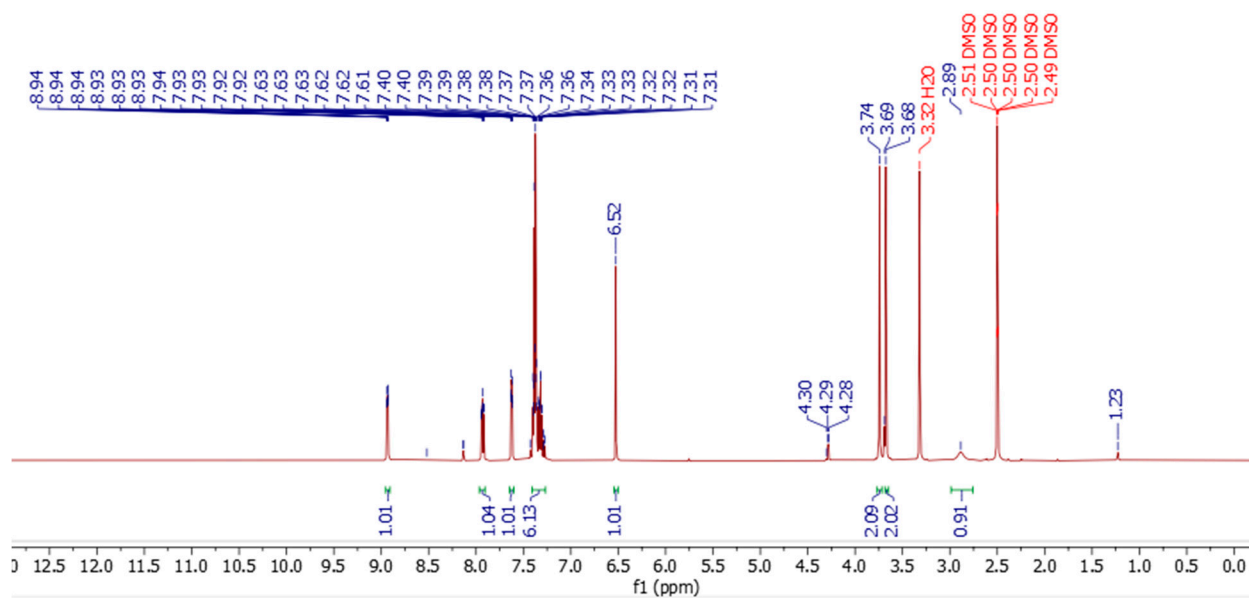

<sup>13</sup>C NMR of **6**

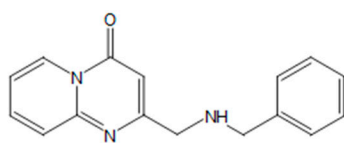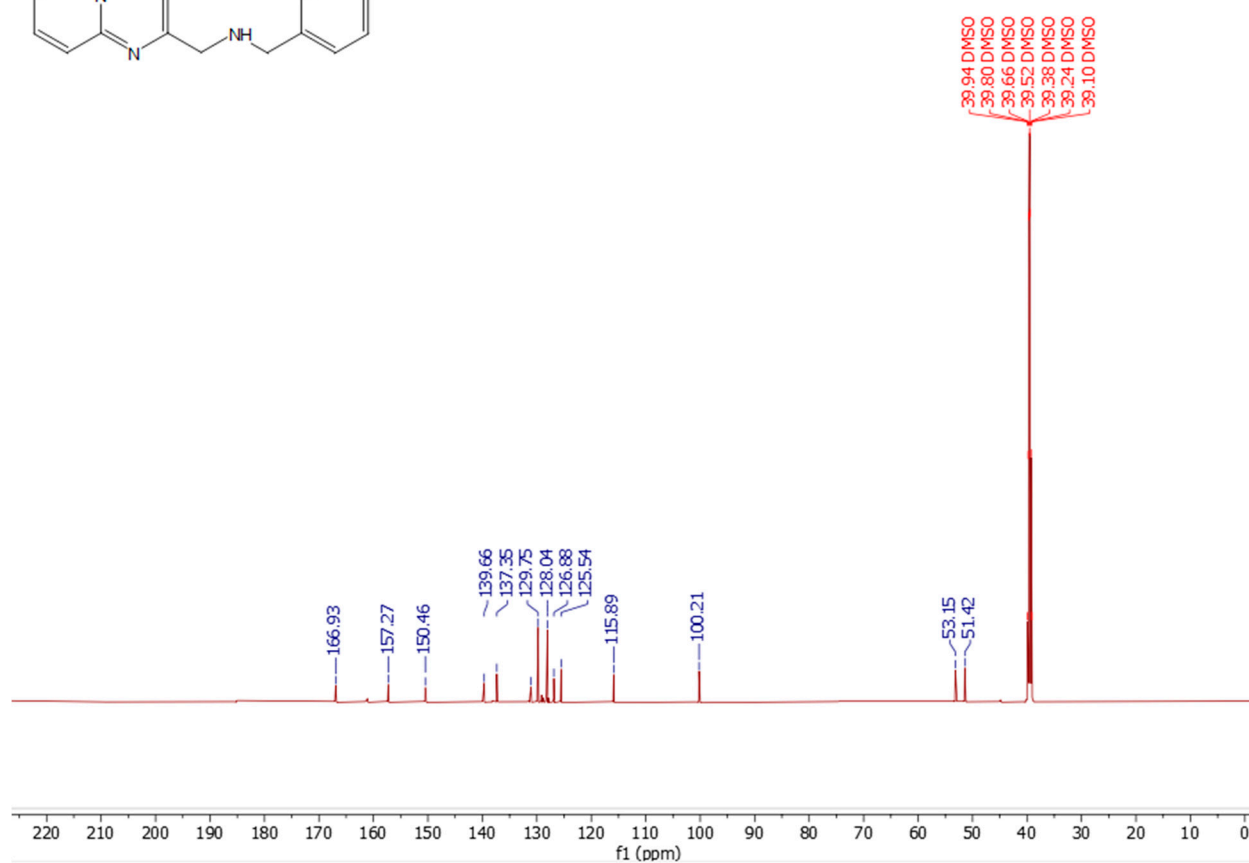

<sup>1</sup>H NMR of **11**

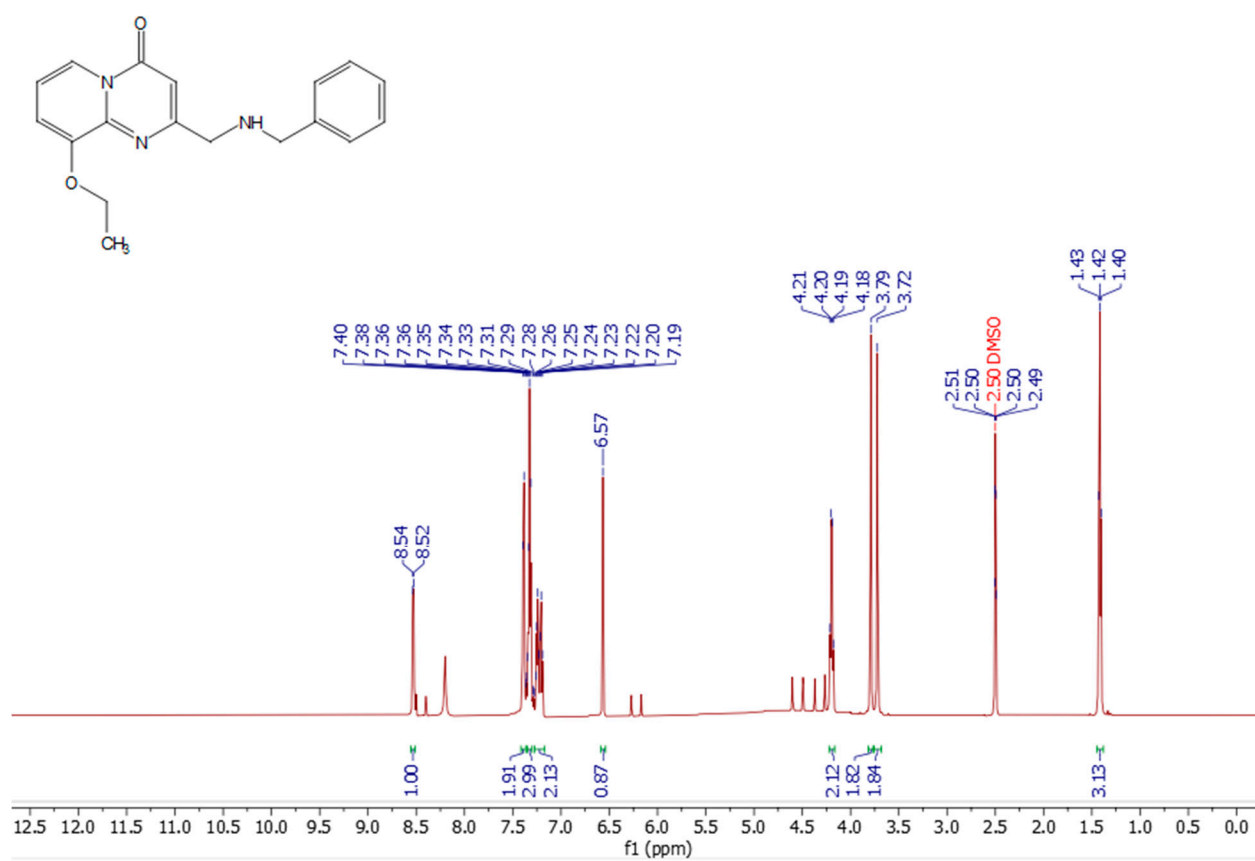

<sup>13</sup>CNMR of **11**

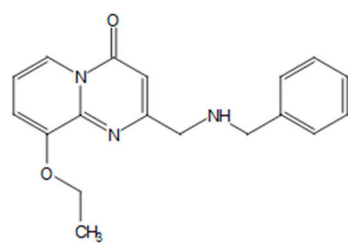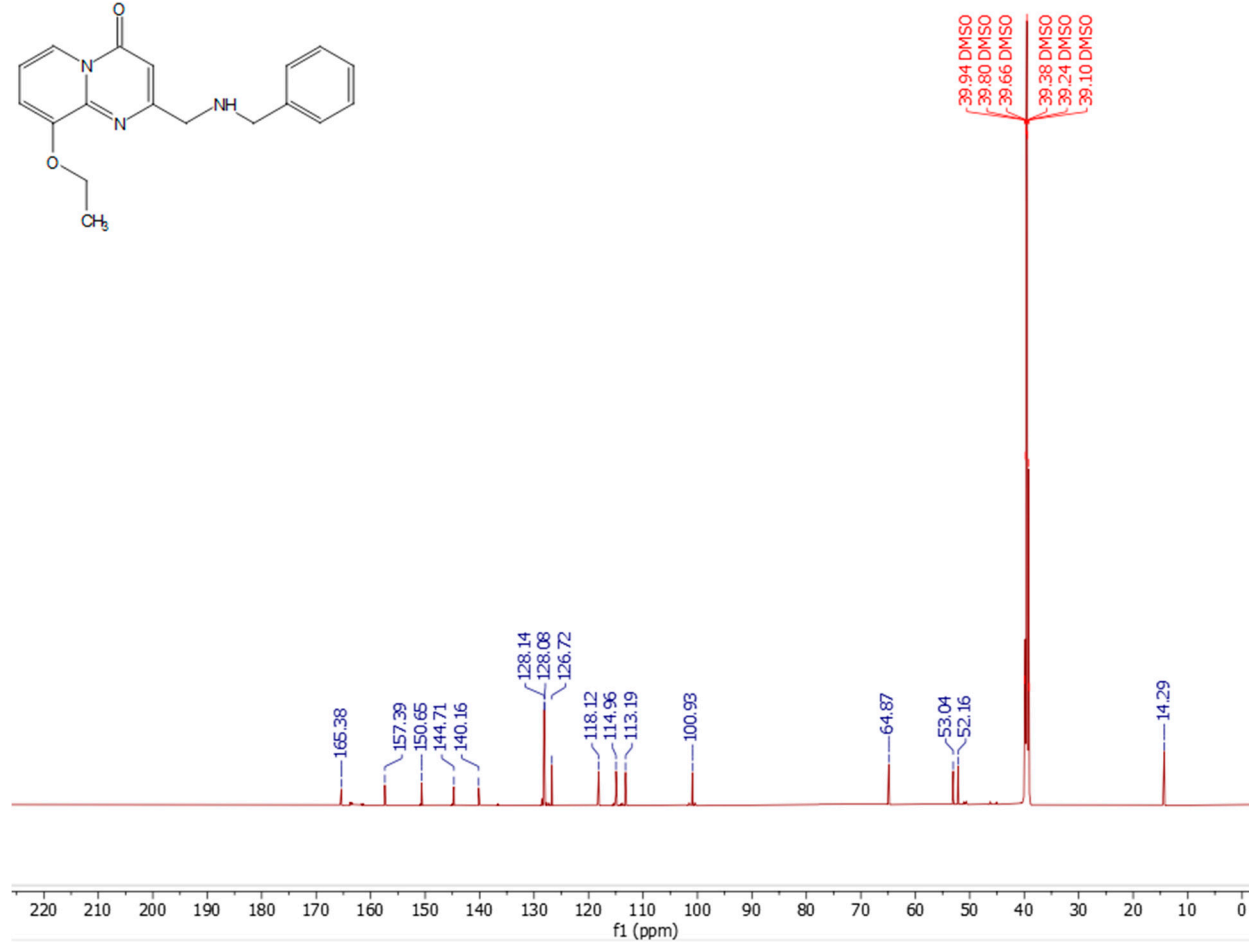

<sup>1</sup>H NMR of **13**

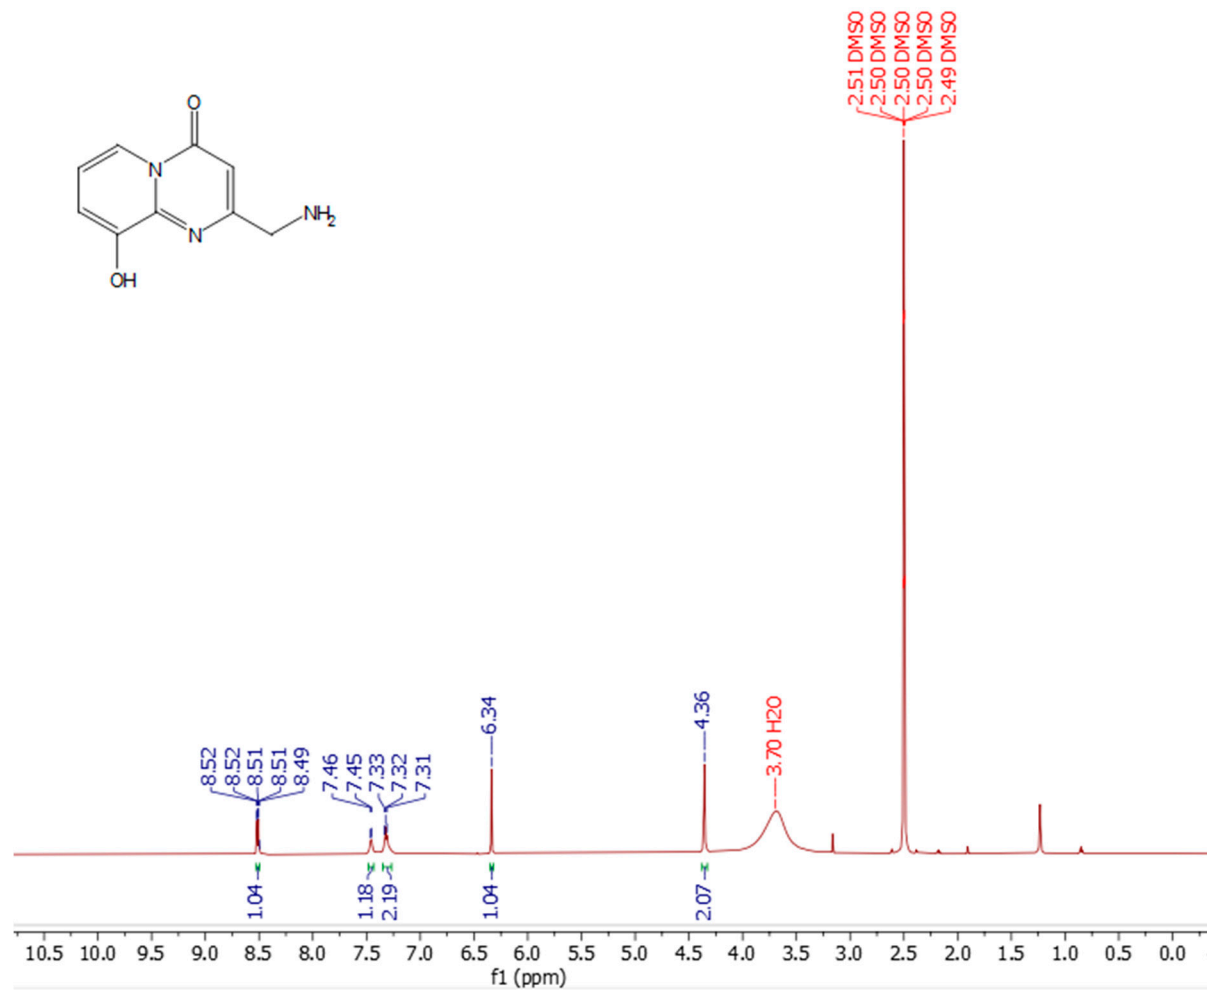

<sup>13</sup>C NMR of **13**

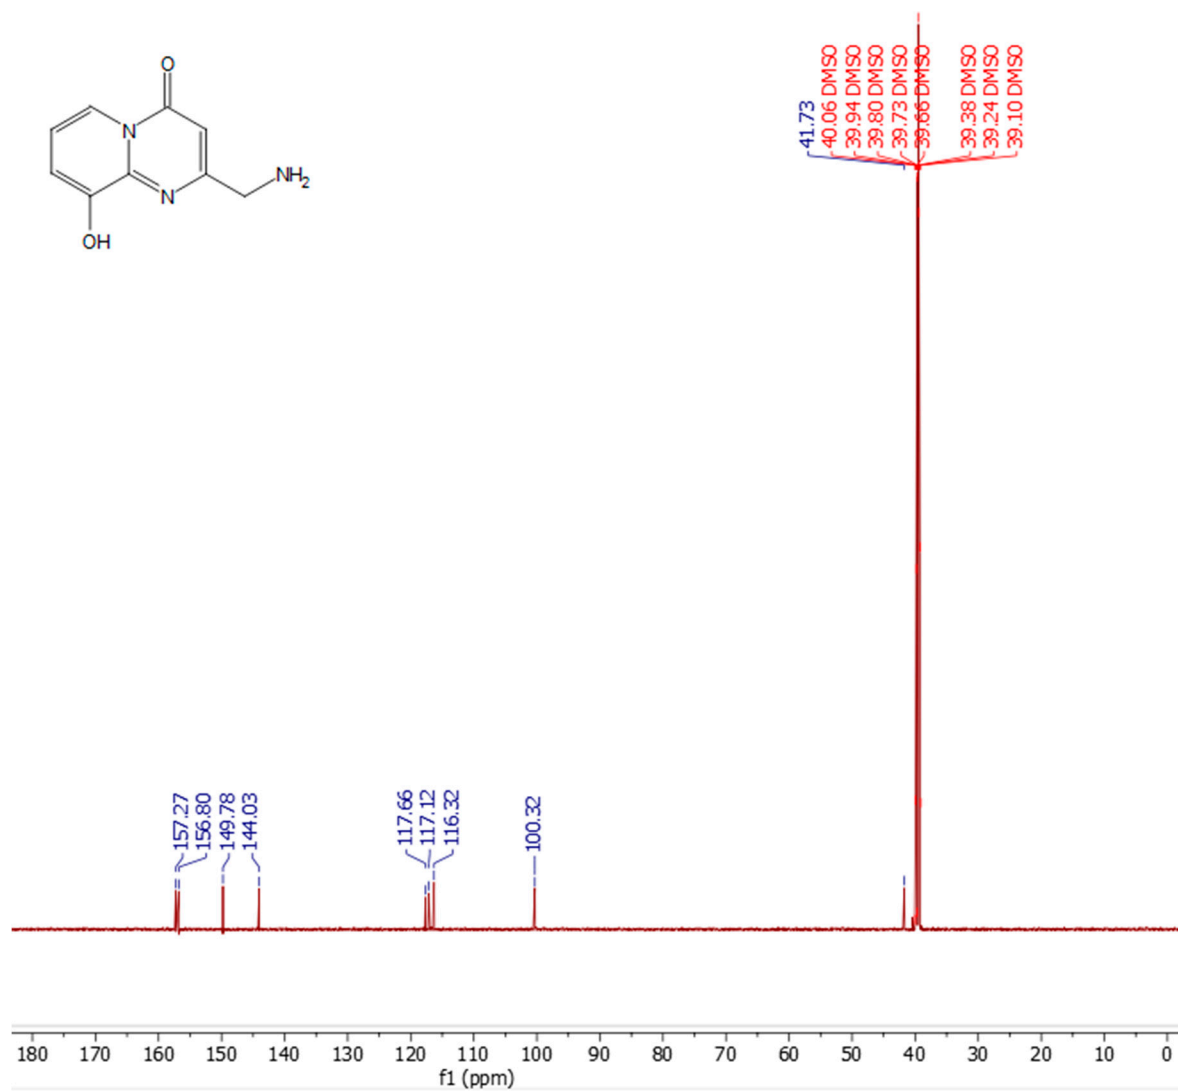

<sup>1</sup>H NMR of **14**

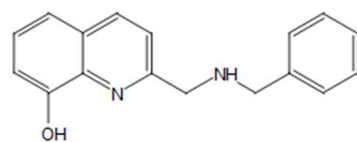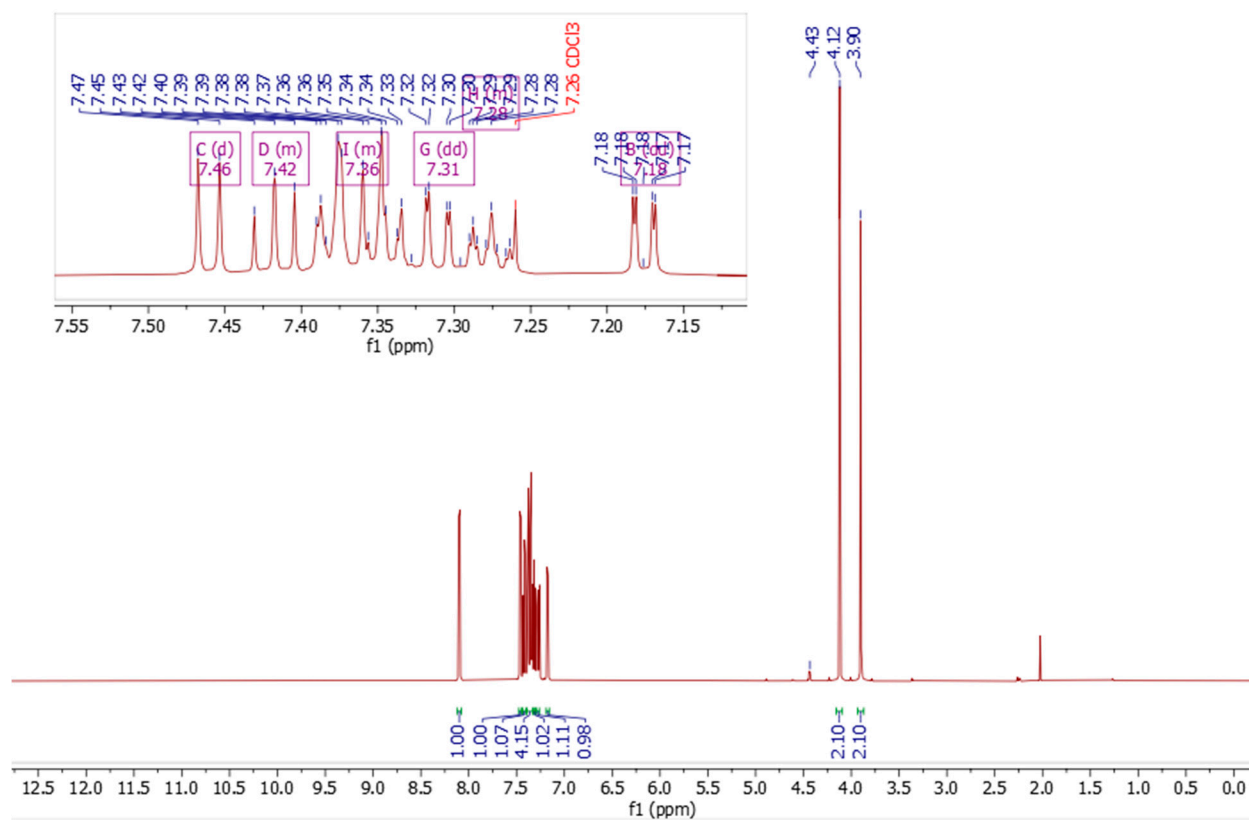



<sup>13</sup>C NMR of **14**

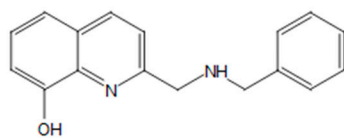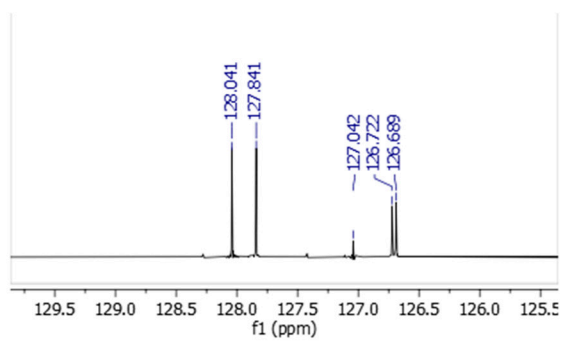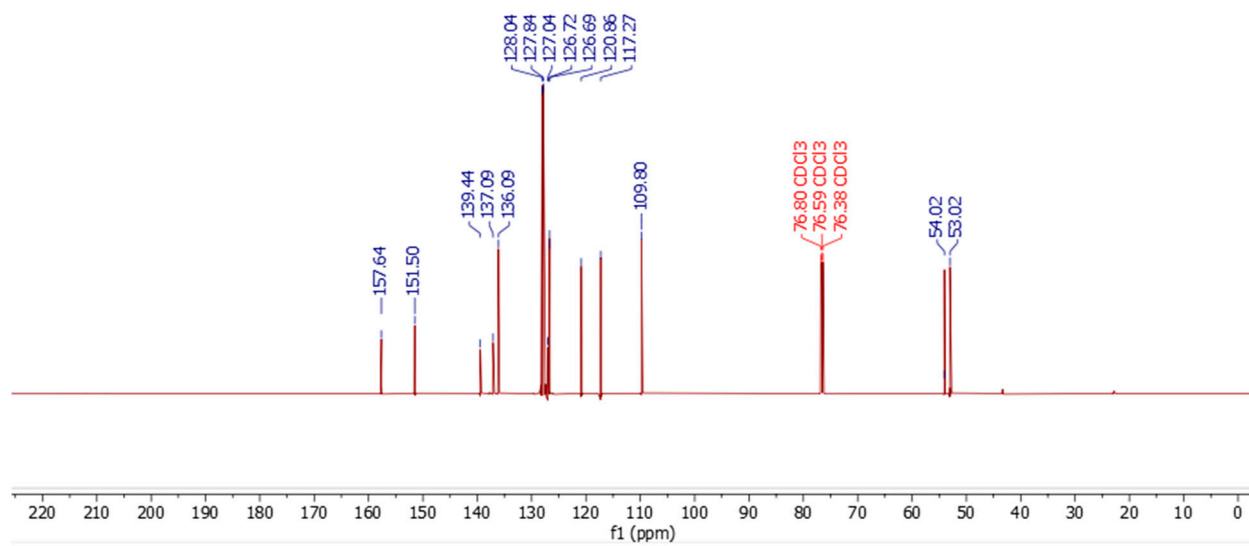

<sup>1</sup>H NMR of **16**

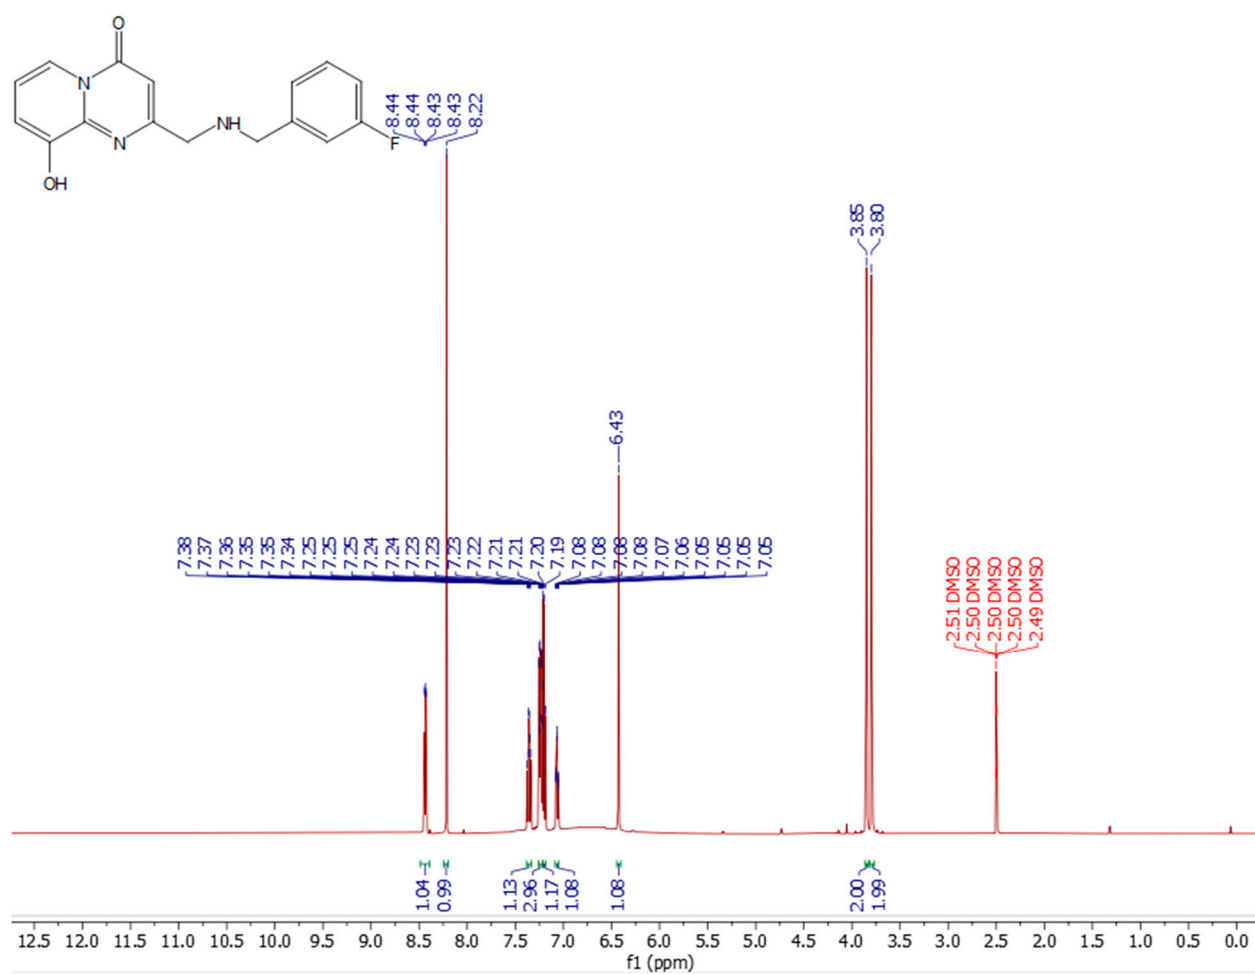

<sup>13</sup>C NMR of **16**

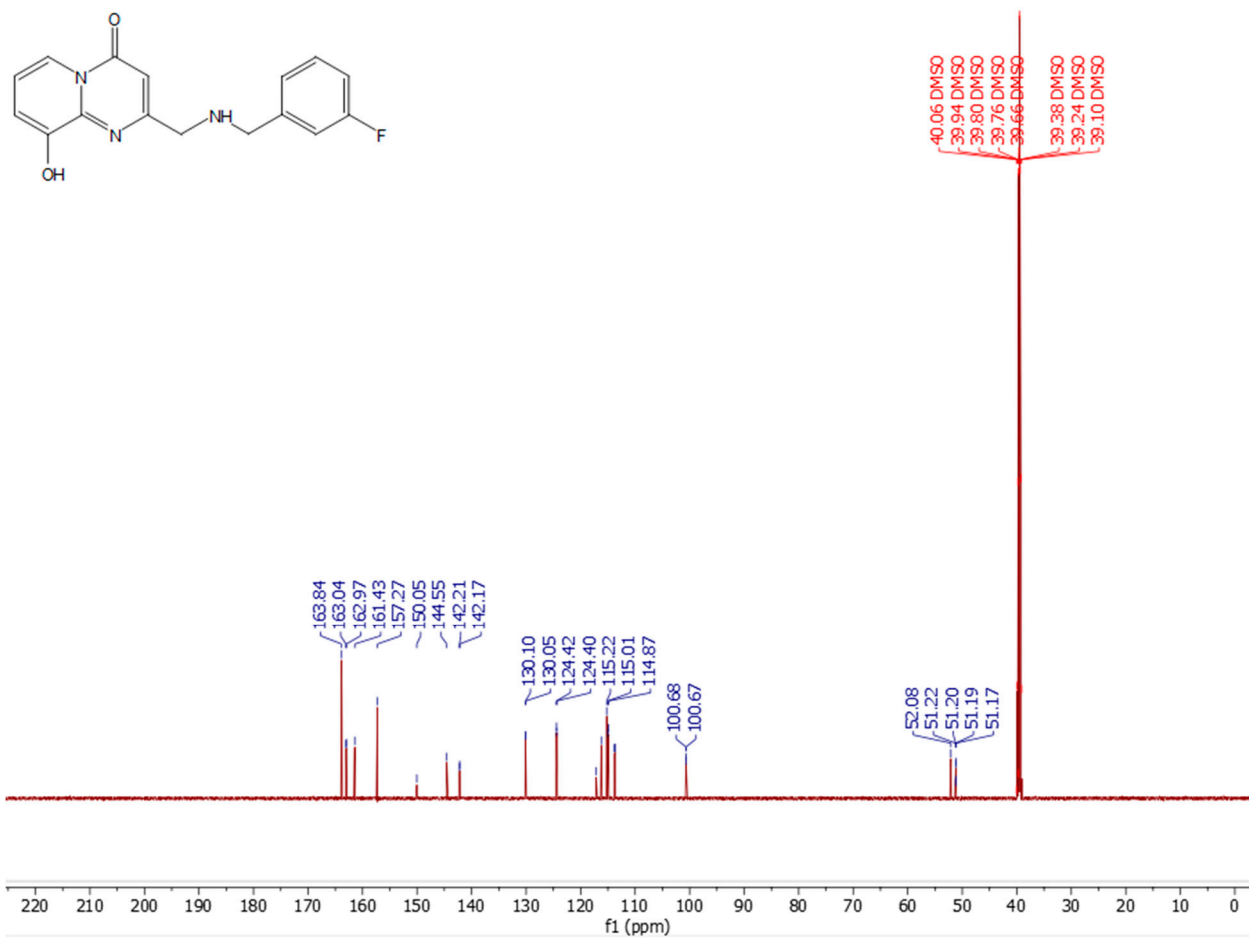

<sup>1</sup>H NMR of **20**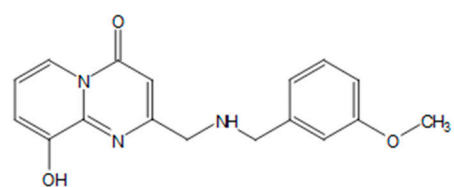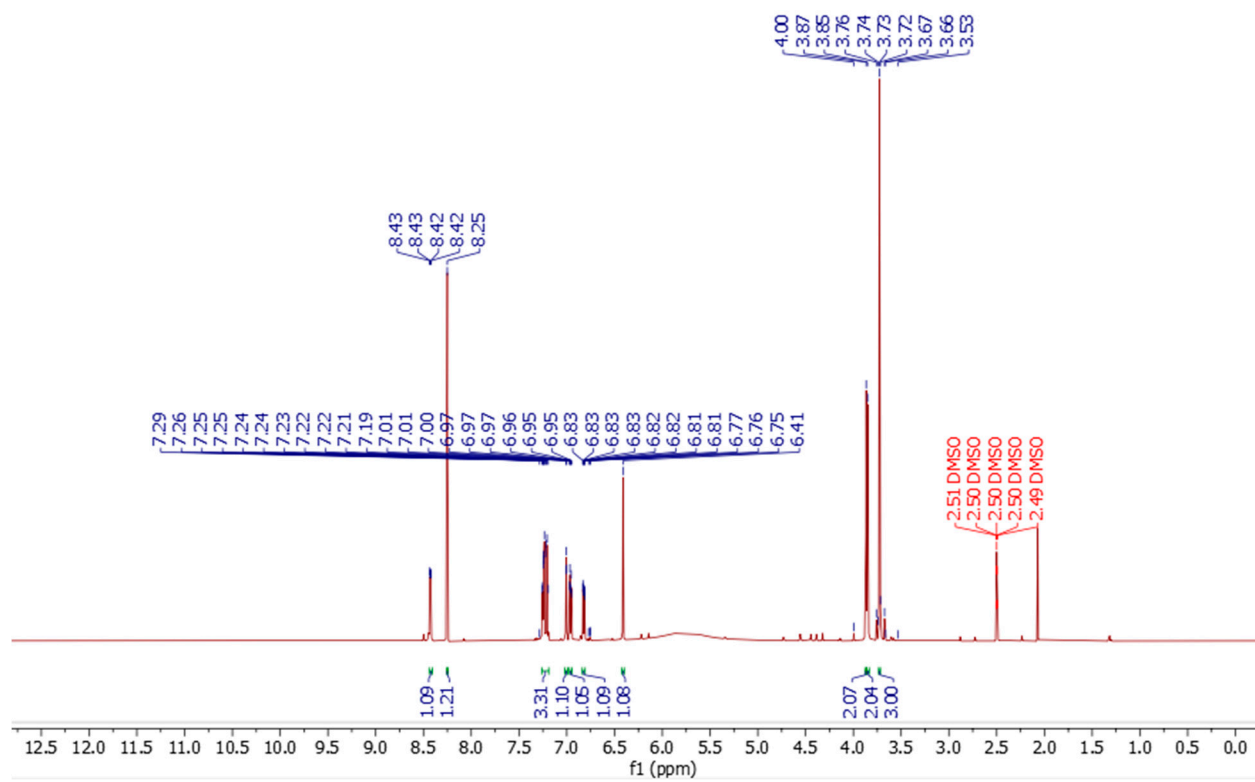

<sup>13</sup>C NMR of **20**

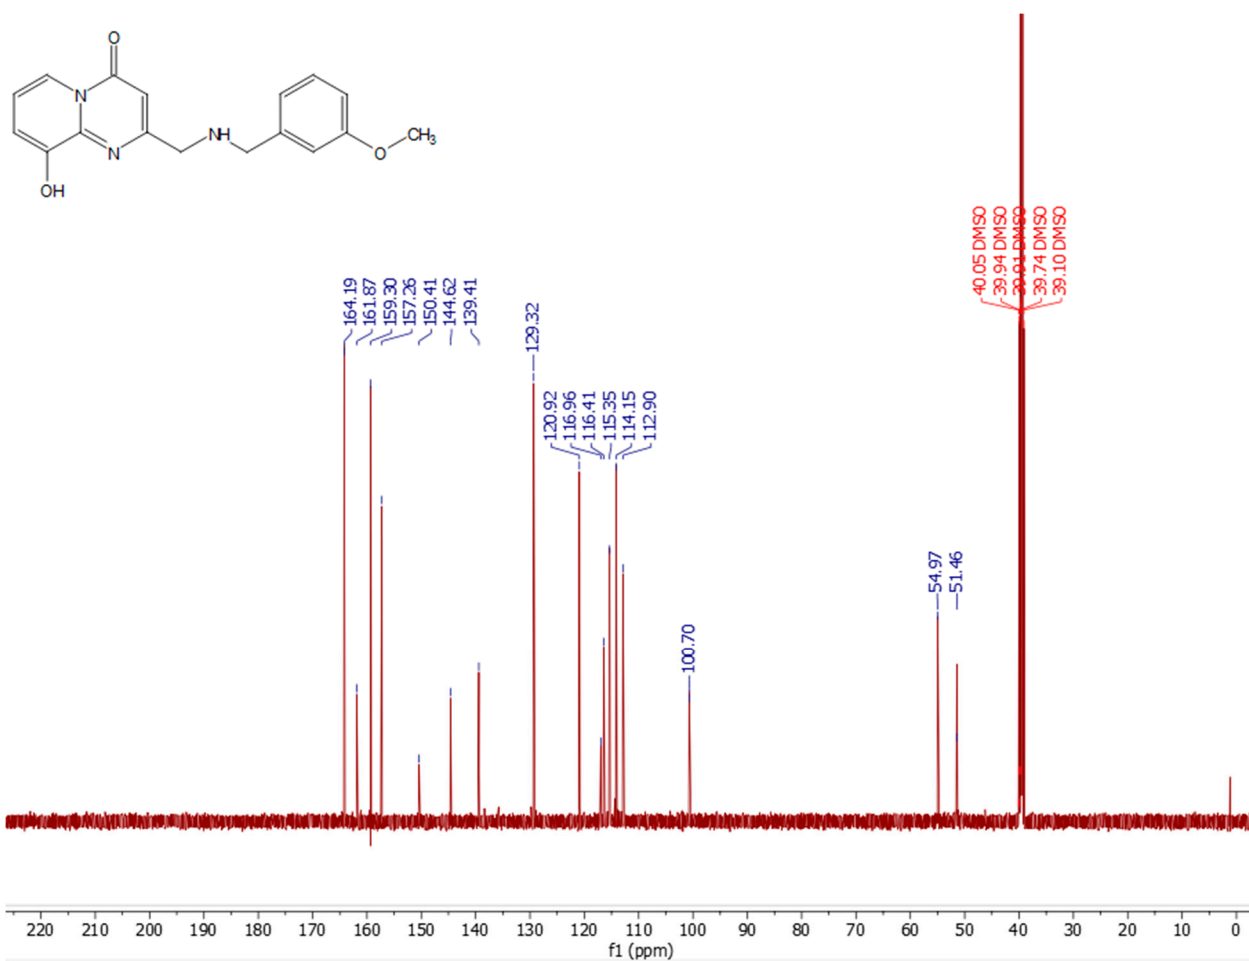

<sup>1</sup>H NMR of **21**

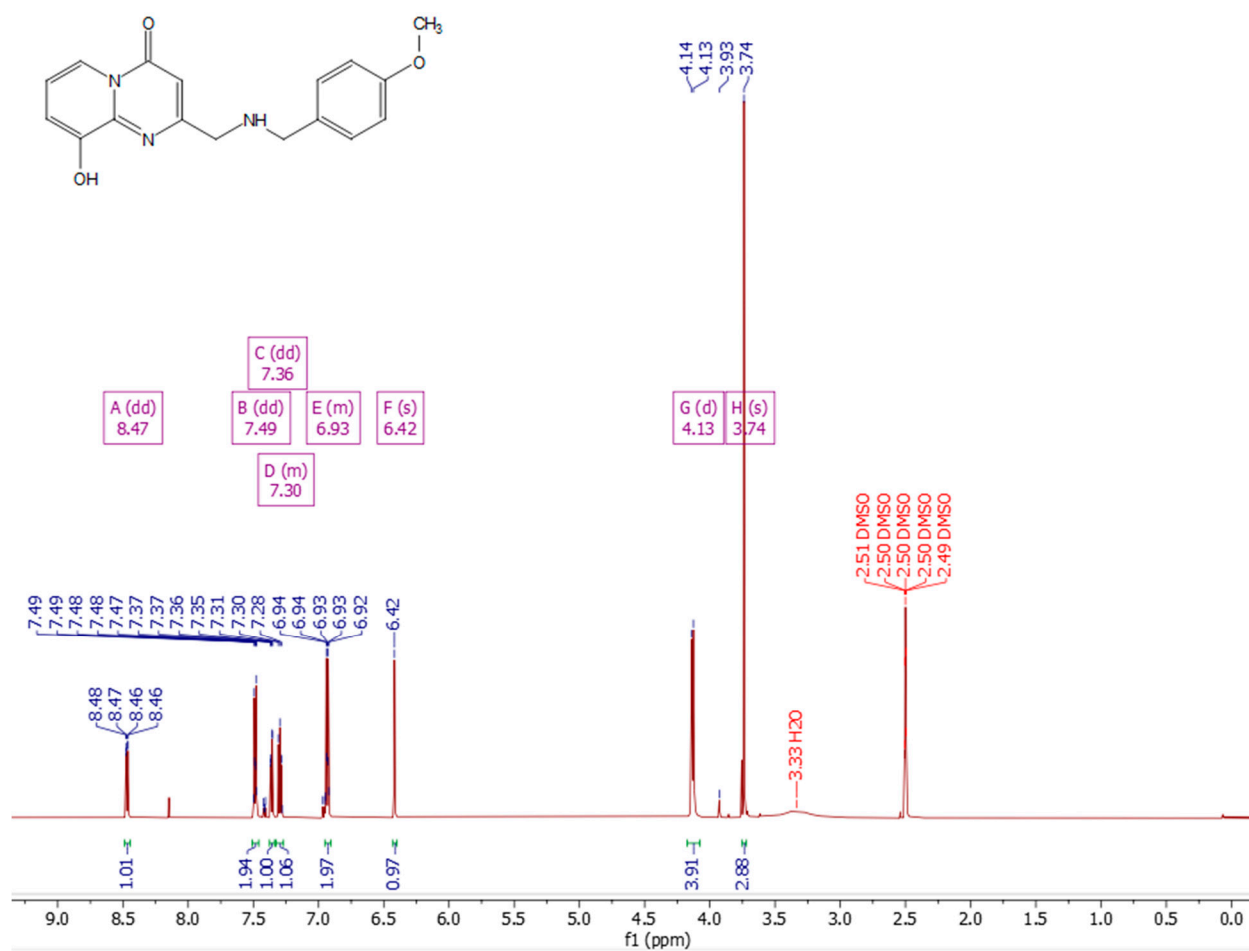

<sup>13</sup>C NMR of **21**

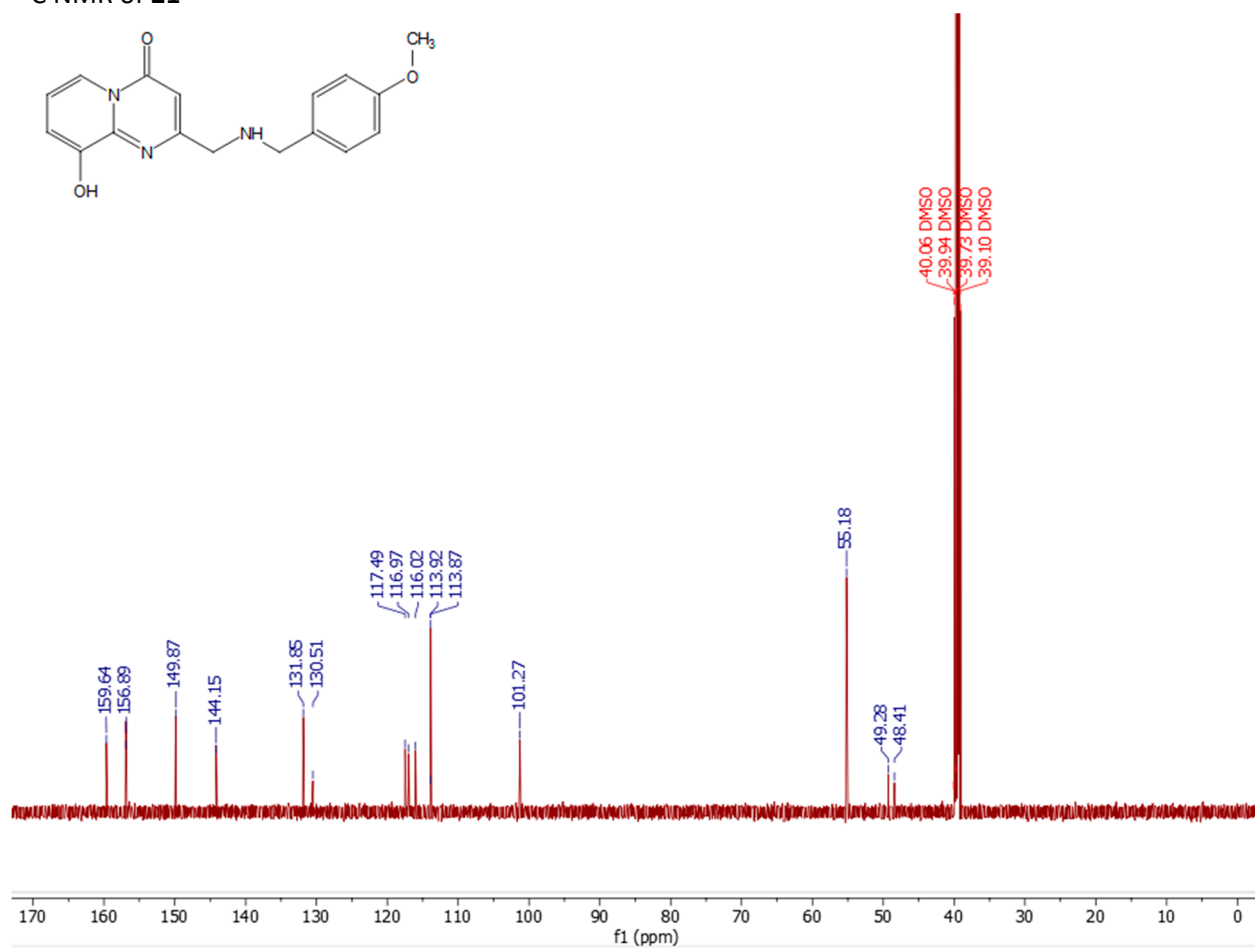

<sup>1</sup>H NMR of **23**

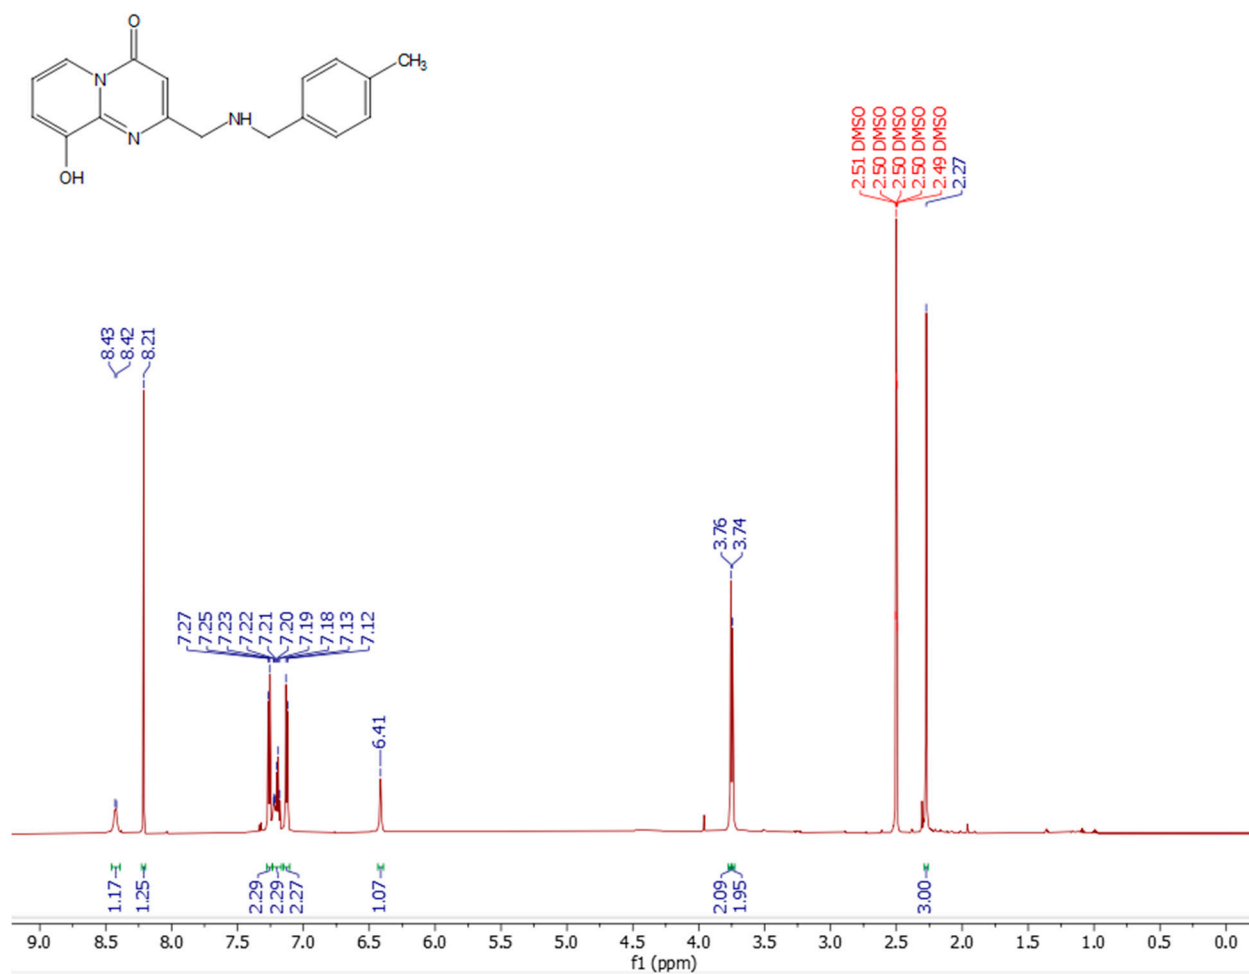



<sup>13</sup>C NMR of **23**

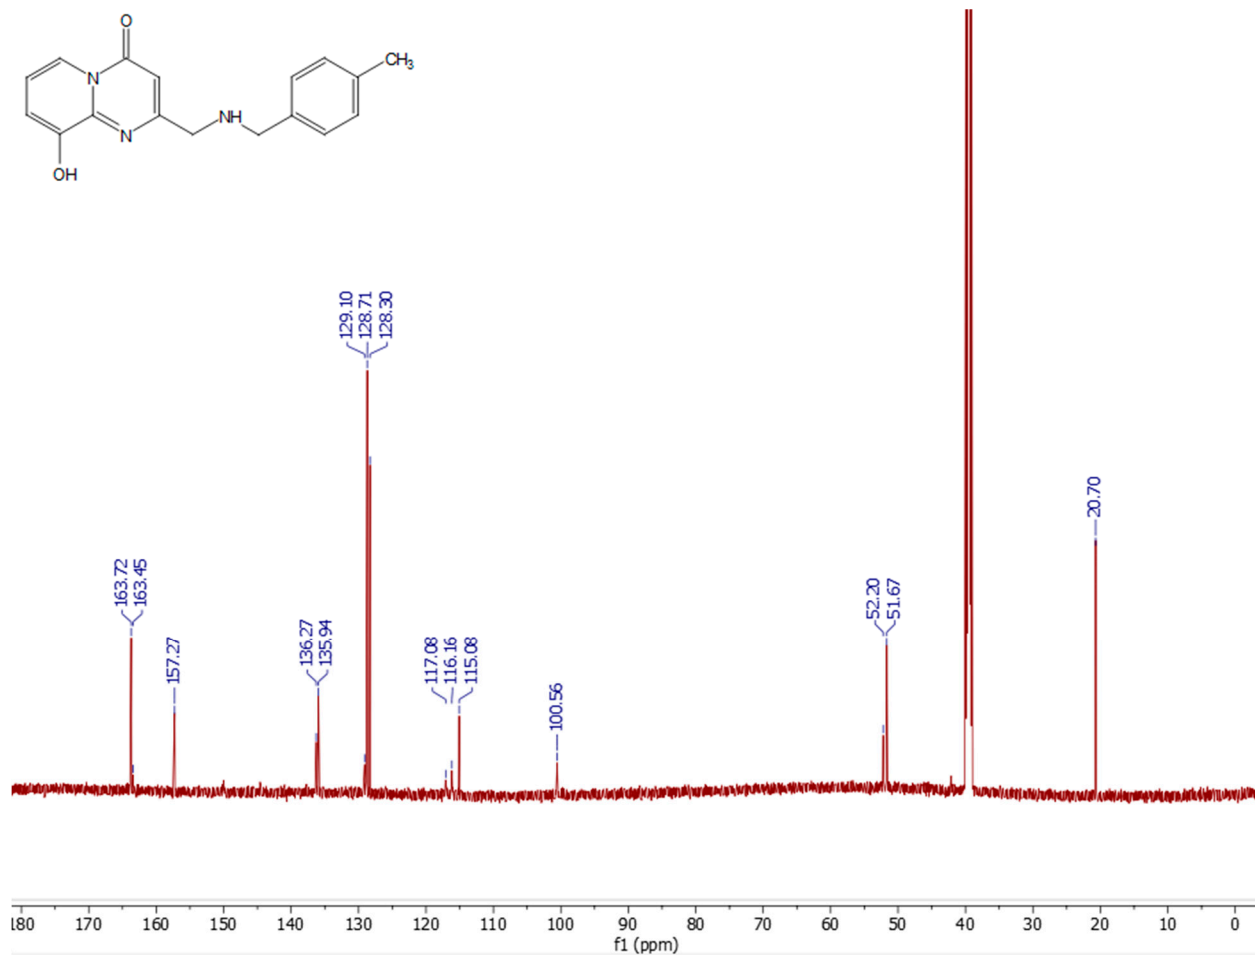

<sup>1</sup>H NMR of **24**

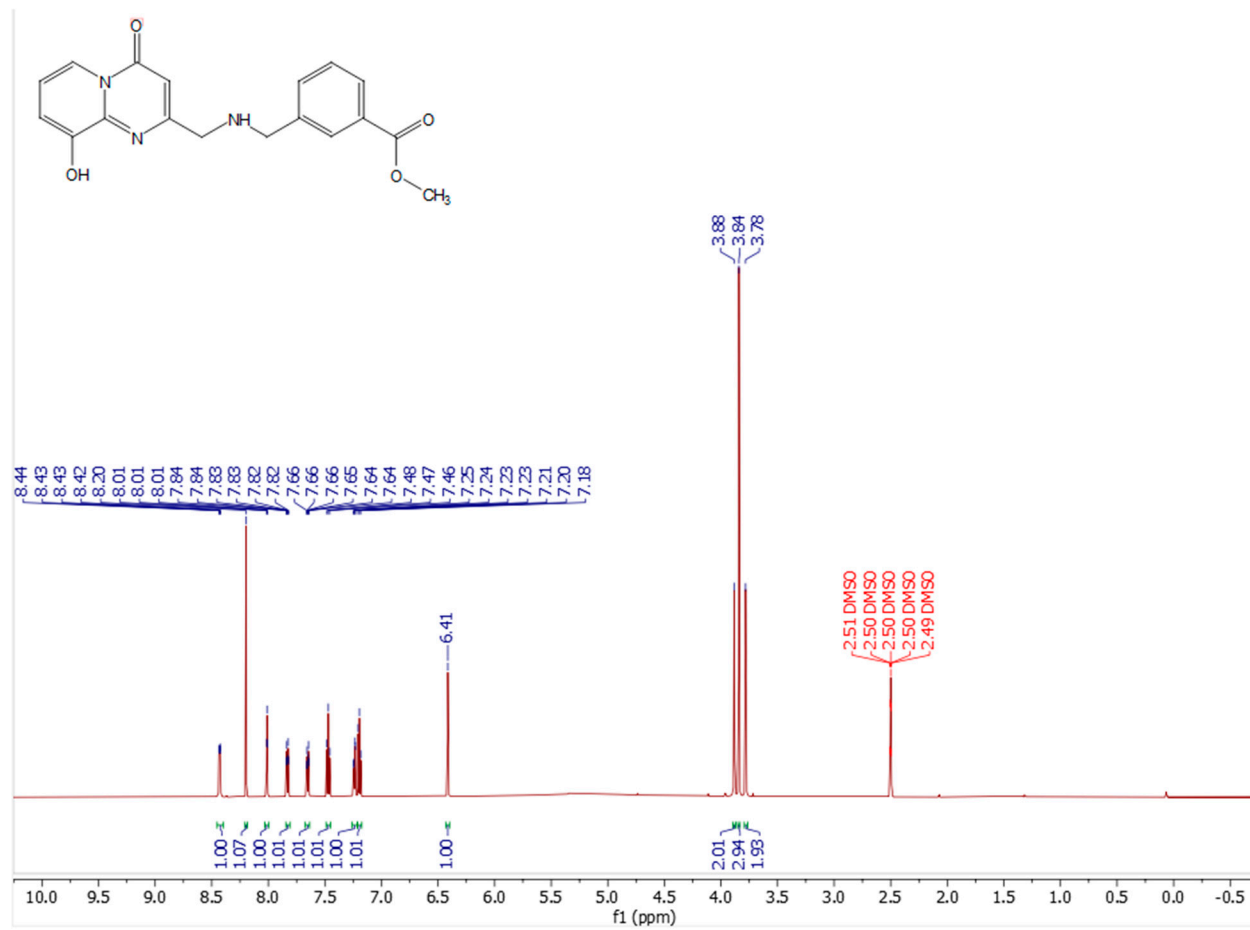

<sup>13</sup>C NMR of **24**

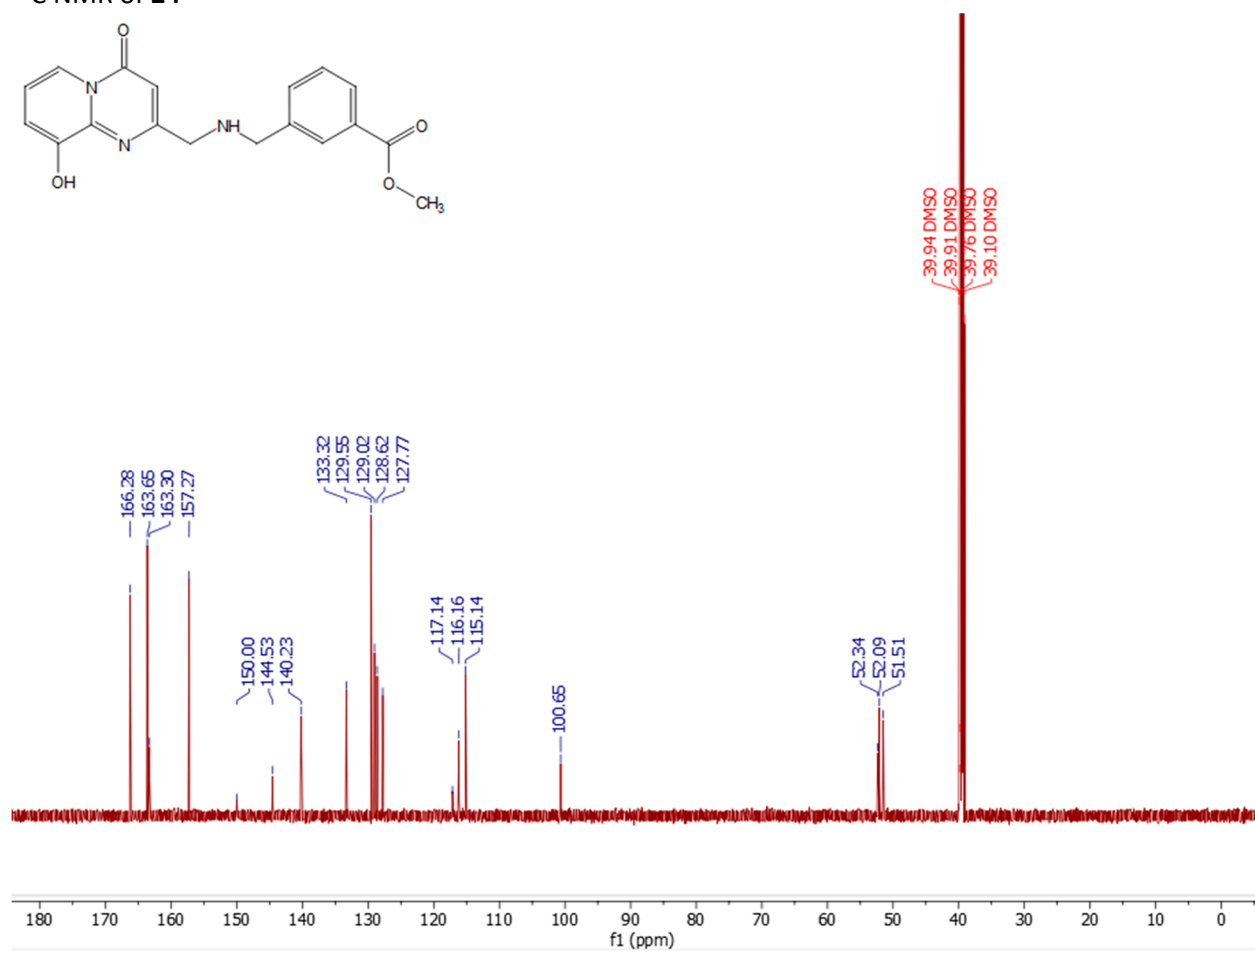

<sup>1</sup>H NMR of **25**

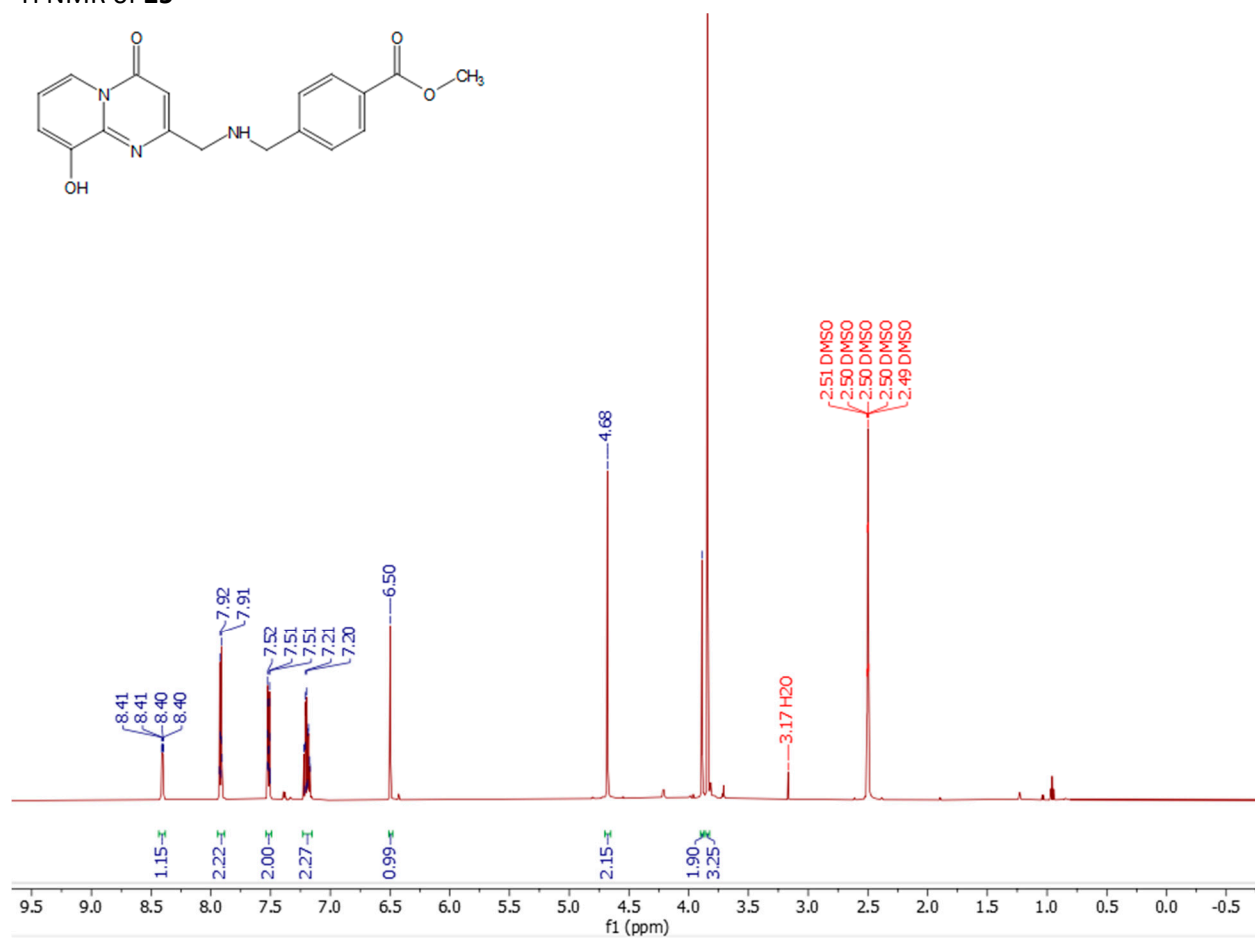

<sup>13</sup>C NMR of **25**

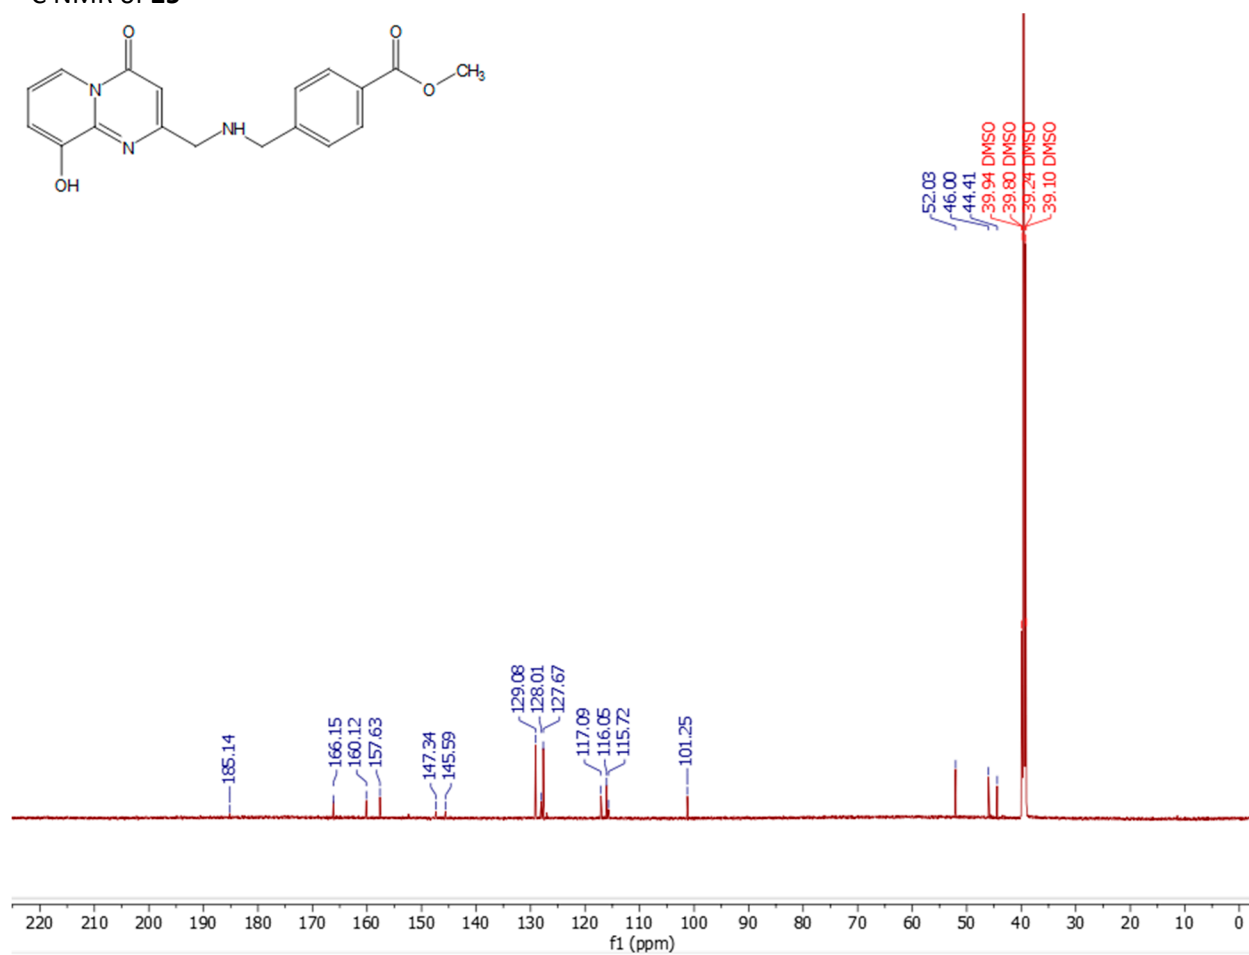

<sup>1</sup>H NMR of **26**

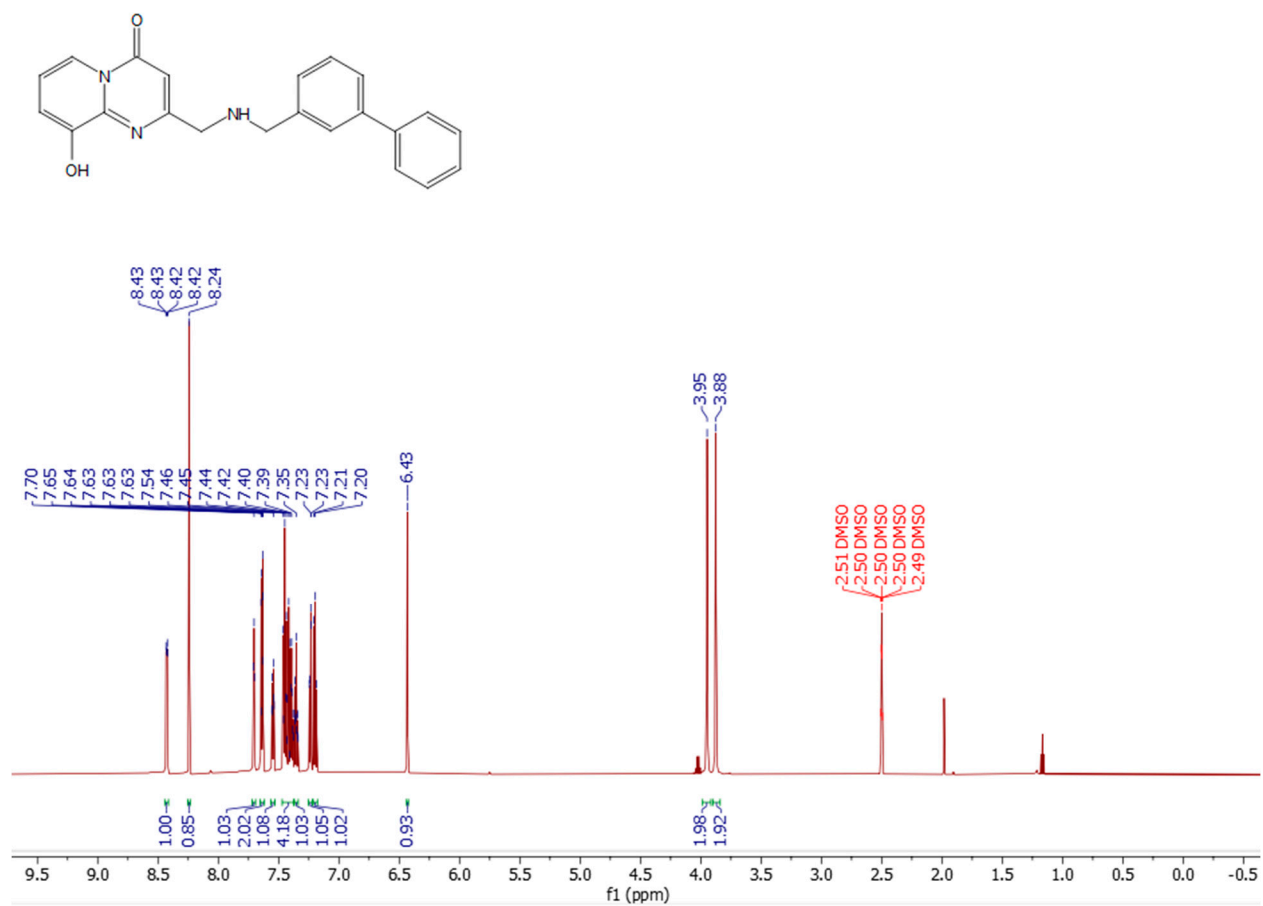

<sup>13</sup>C NMR of **26**

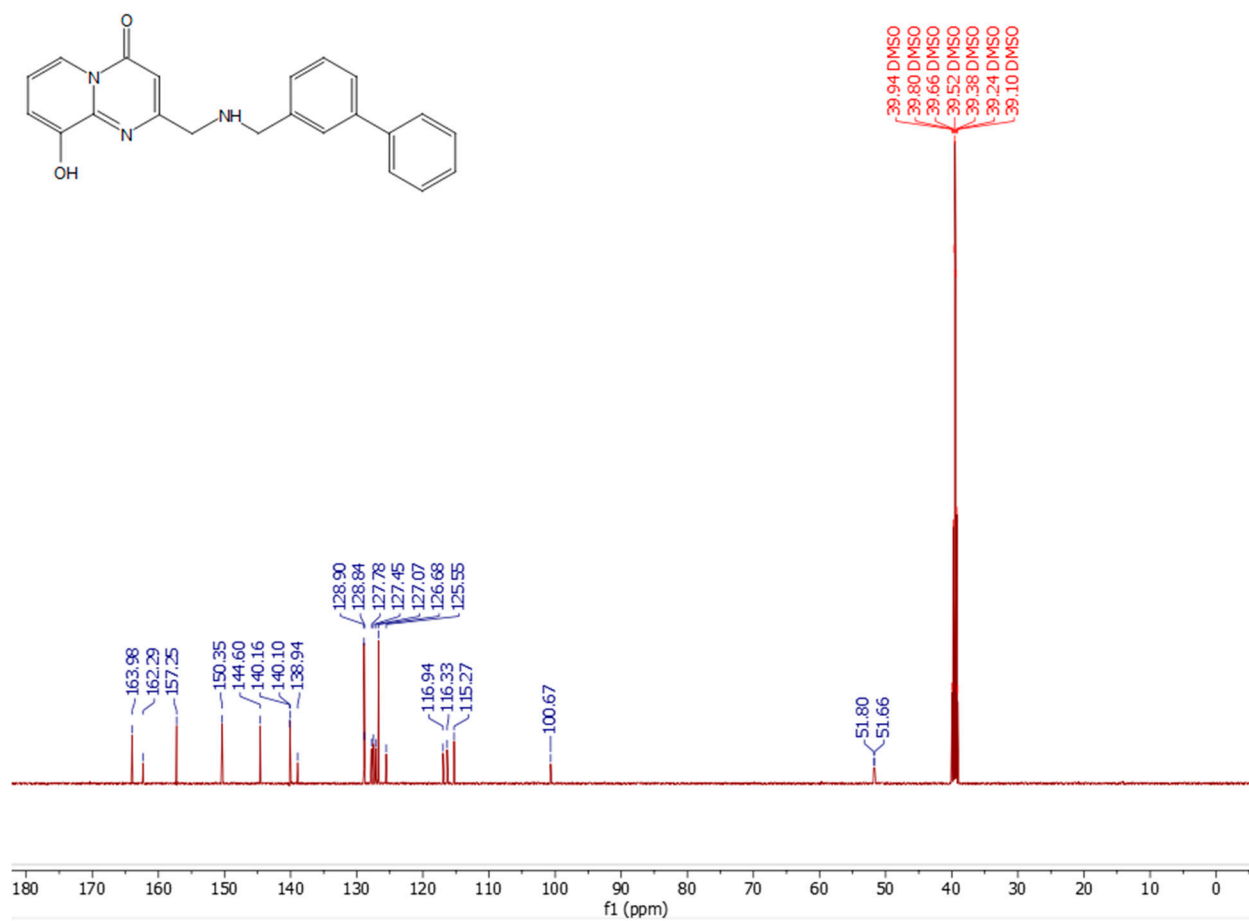

<sup>1</sup>H NMR of **27**

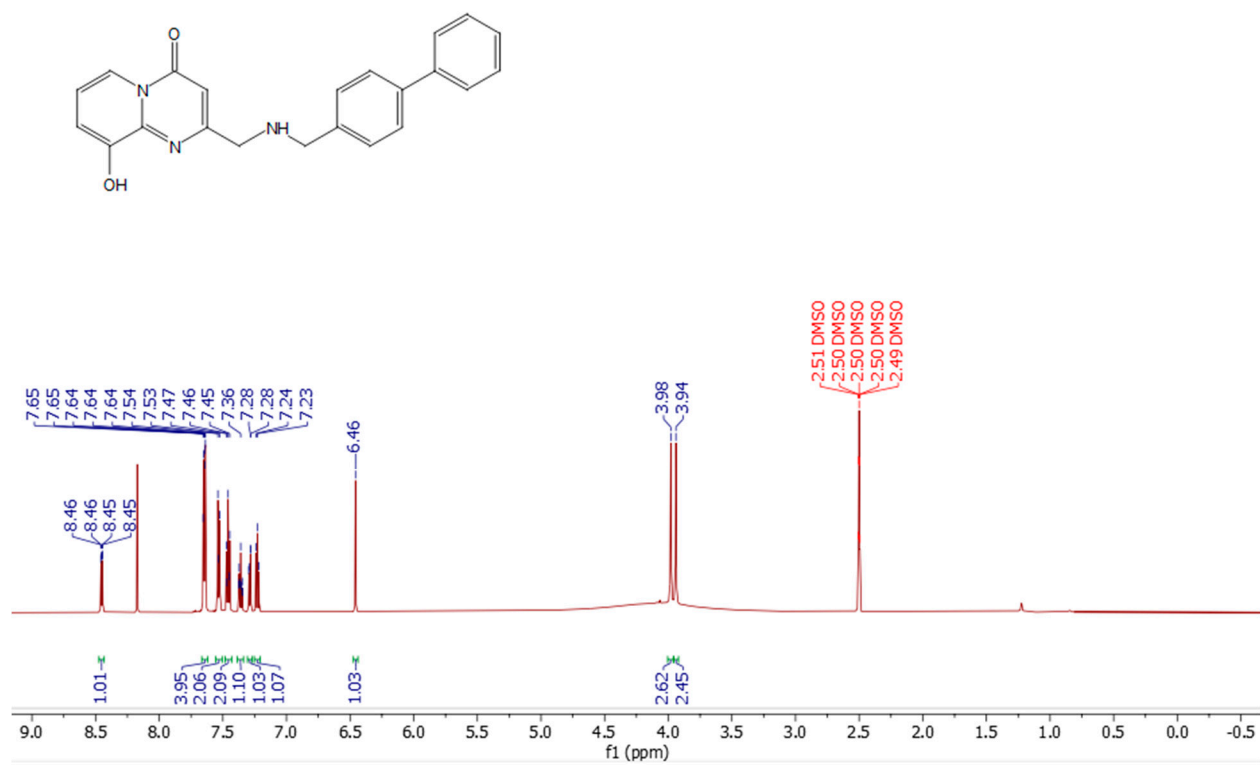



<sup>13</sup>C NMR of **27**

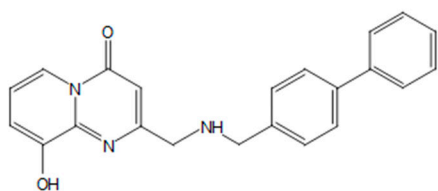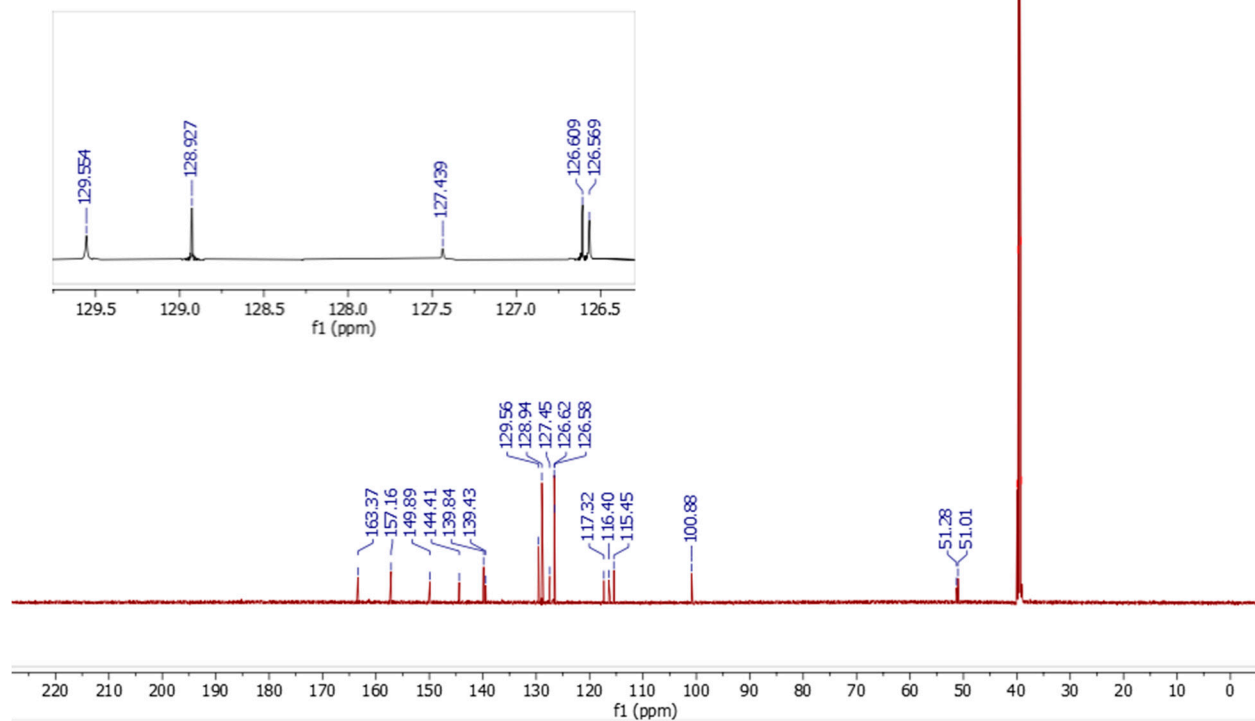

<sup>1</sup>H NMR of **28**

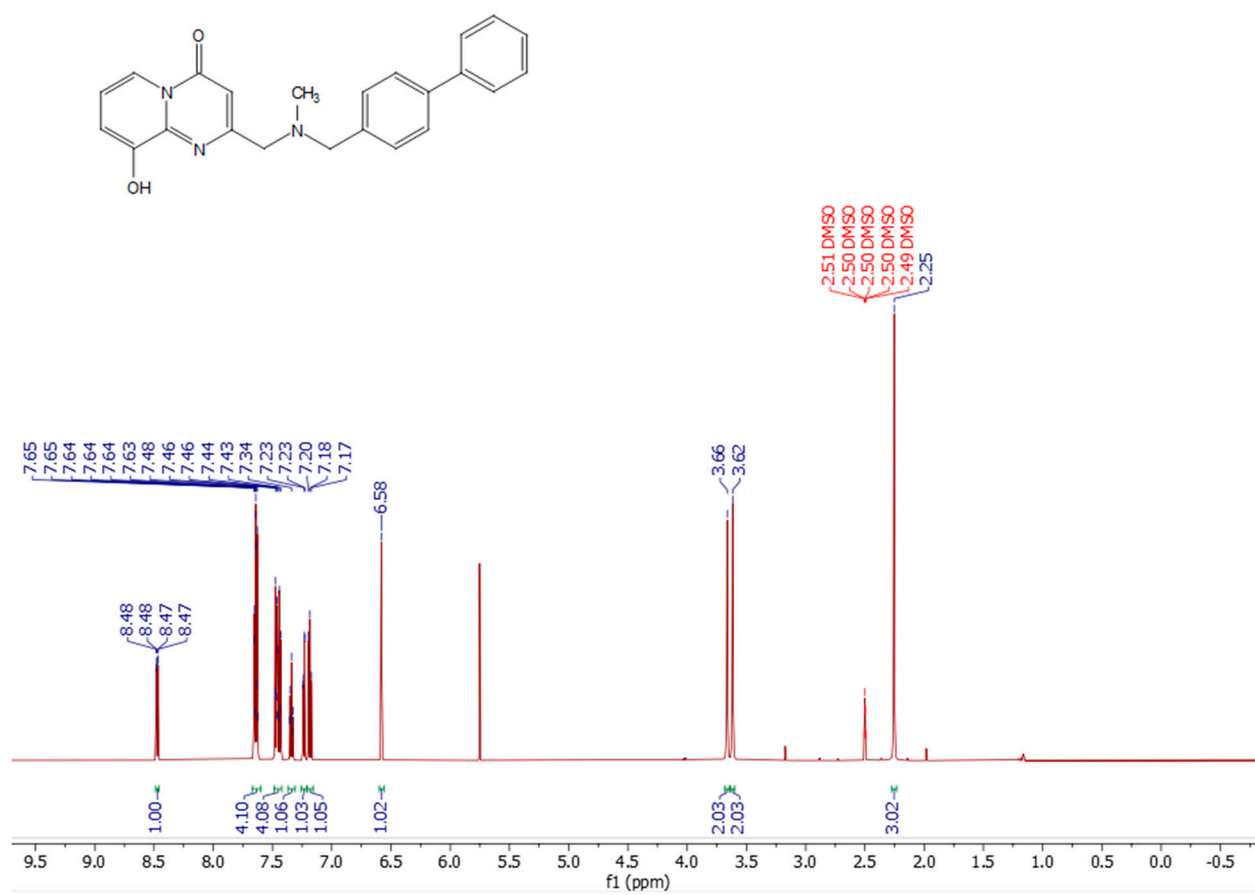

<sup>13</sup>C NMR of **28**

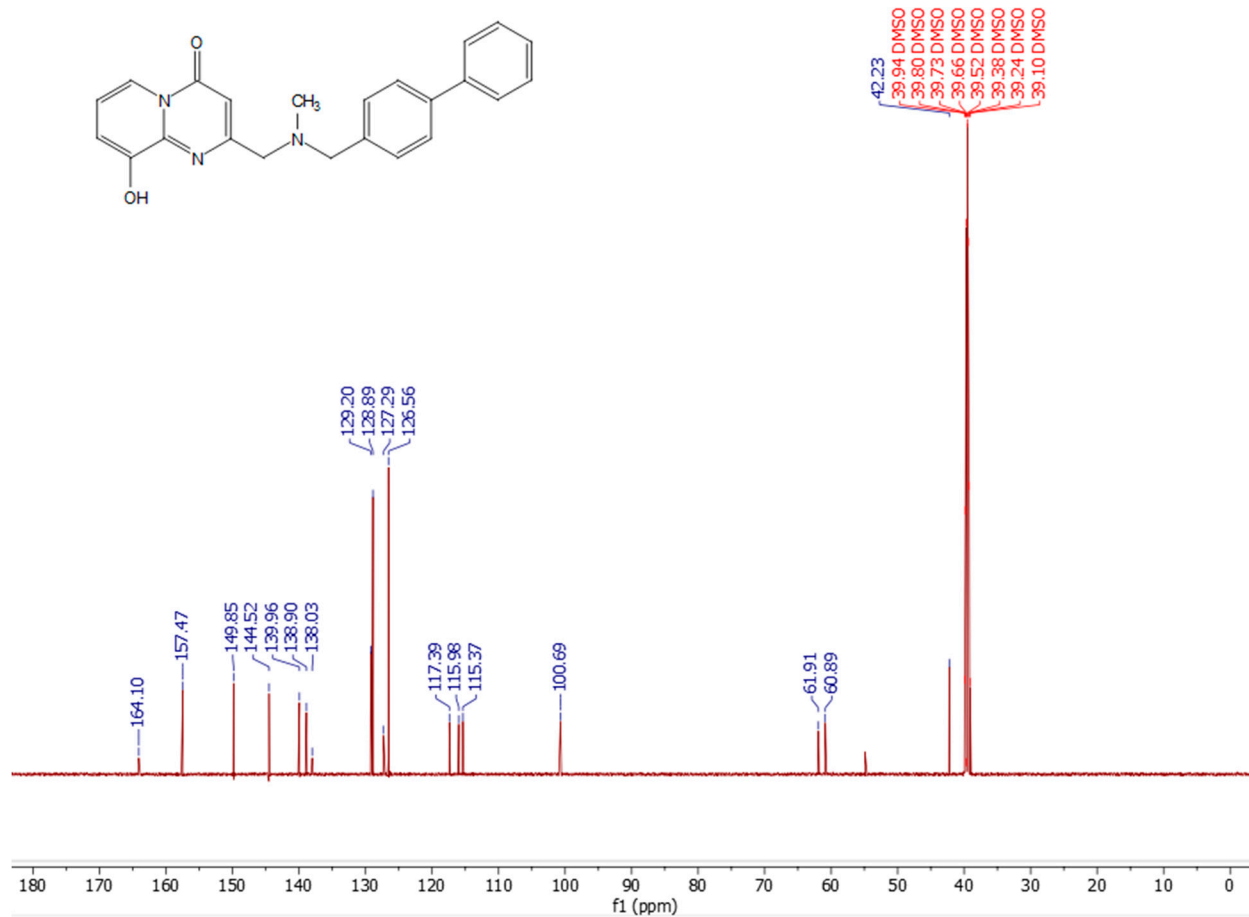

<sup>1</sup>H NMR of **29**

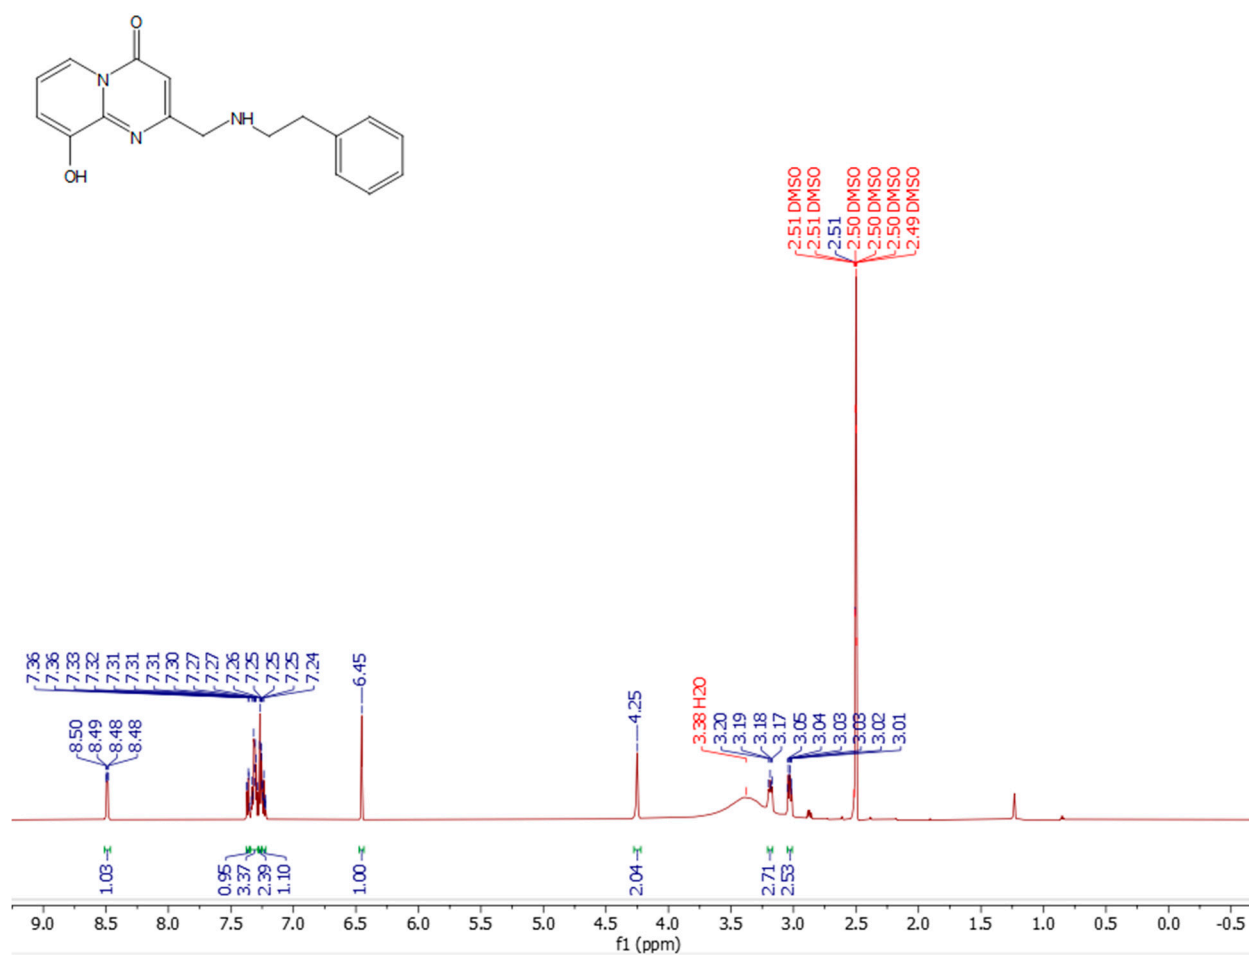

<sup>13</sup>C NMR of **29**

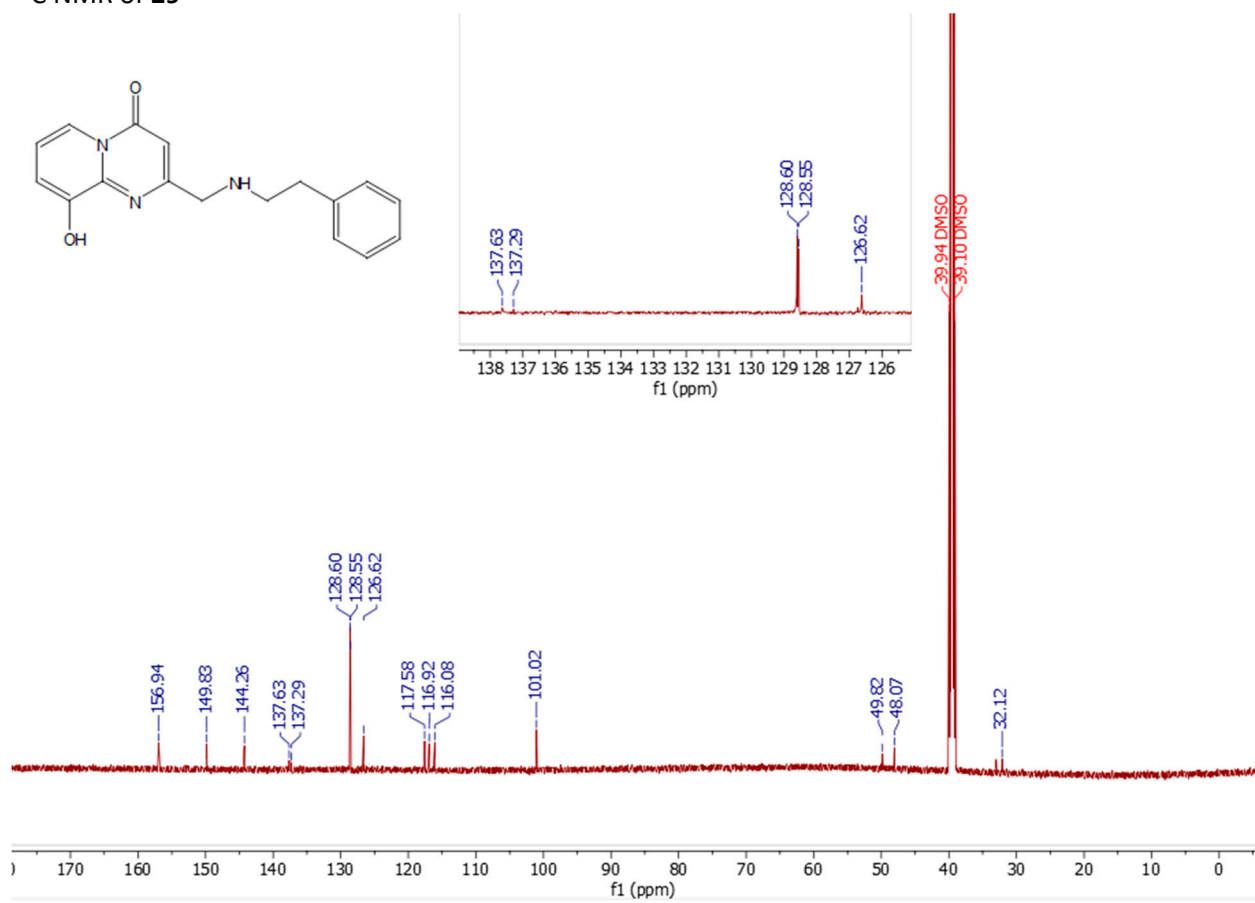

<sup>1</sup>H NMR of **30**

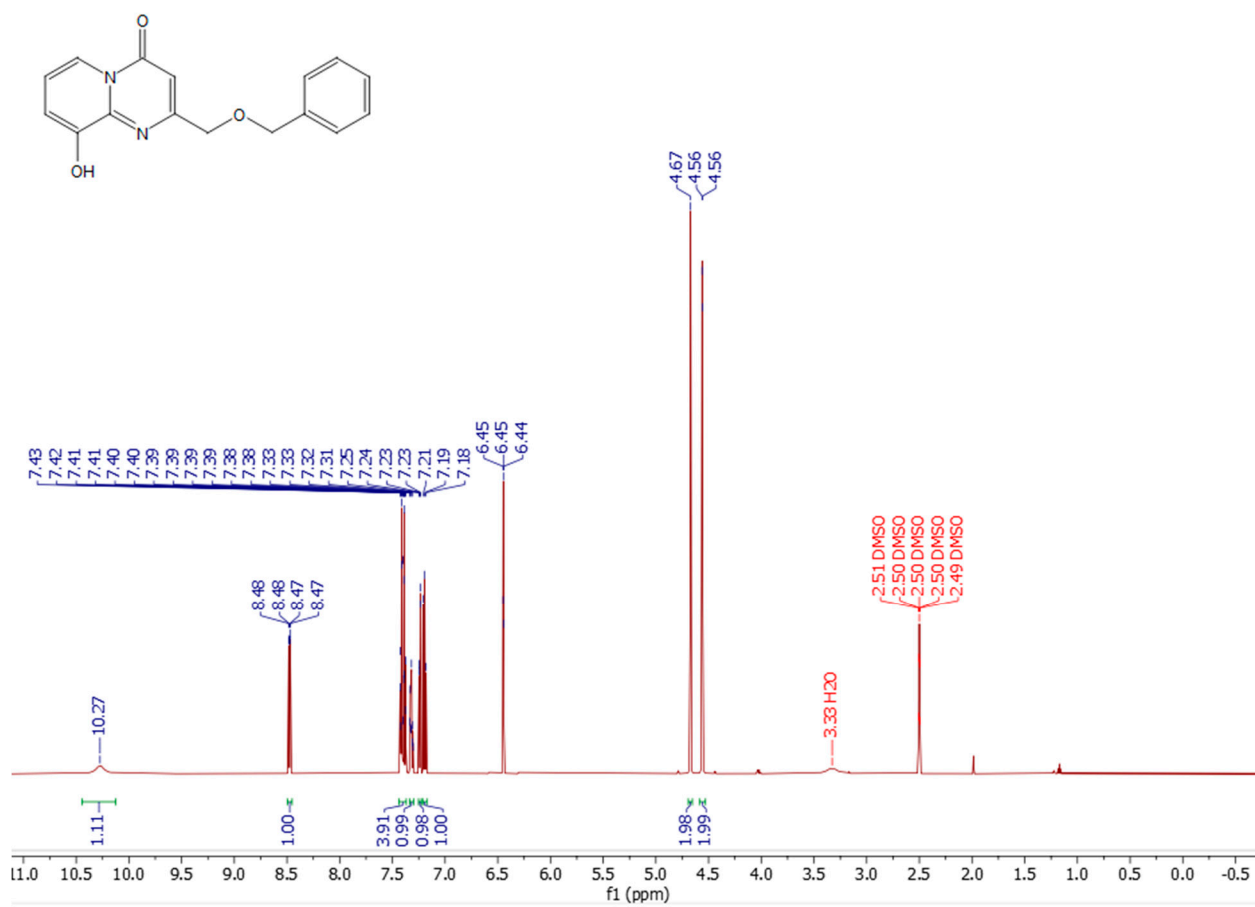

<sup>13</sup>C NMR of **30**

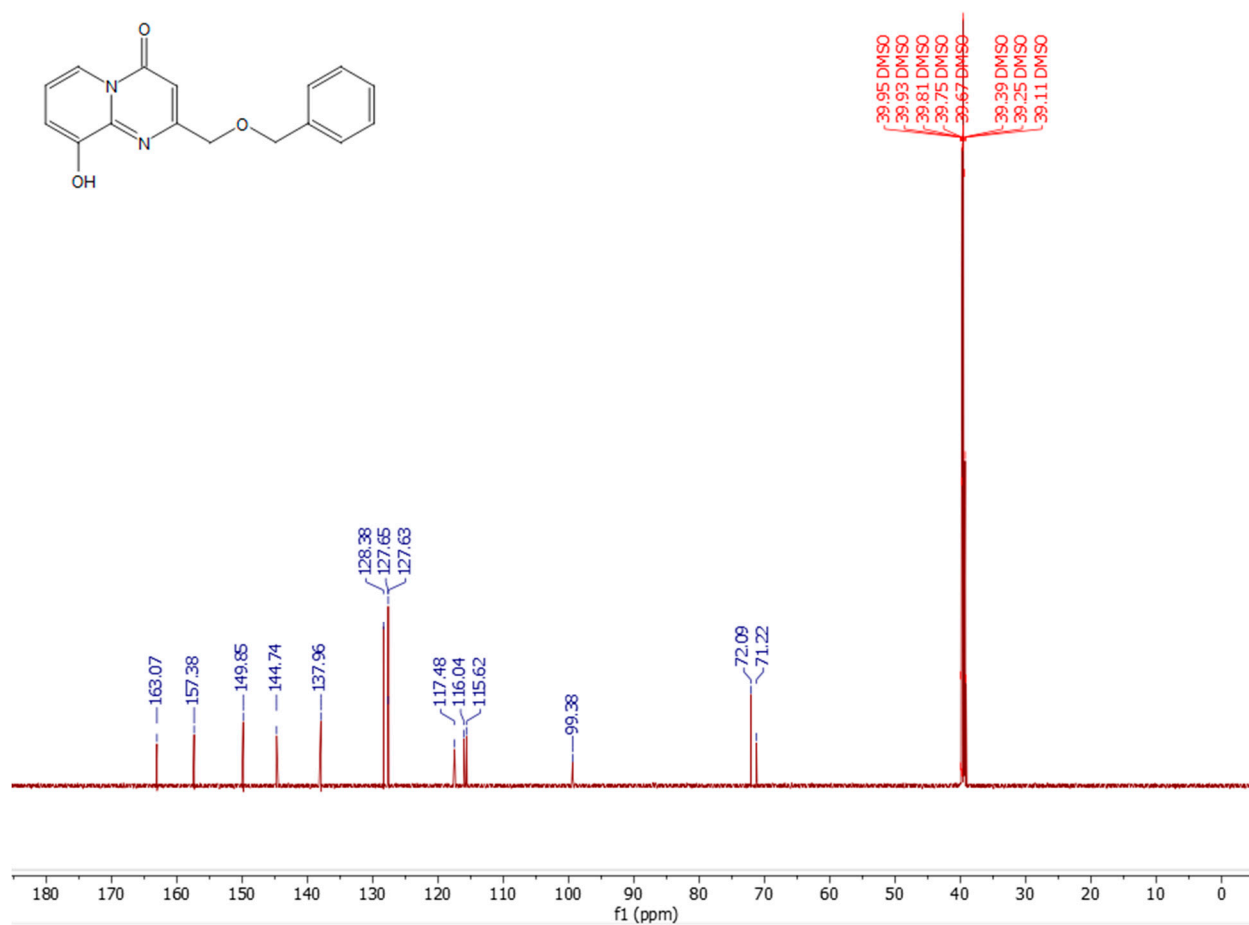

<sup>1</sup>H NMR of **31**

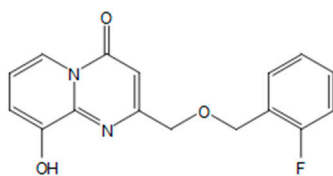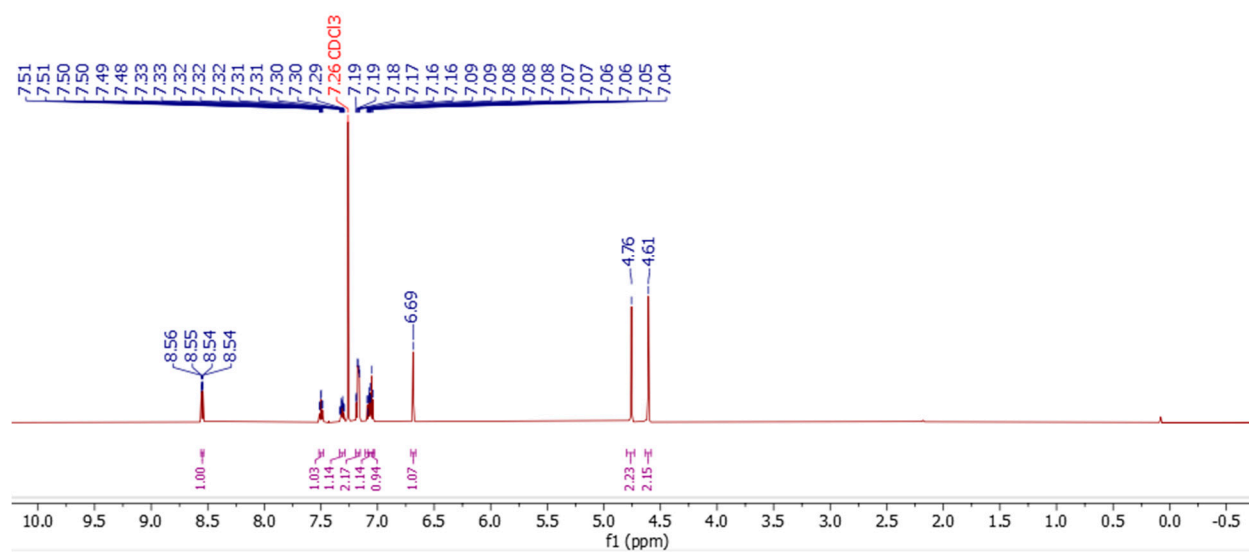



<sup>13</sup>C NMR of **31**

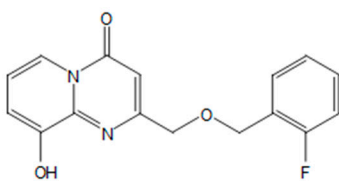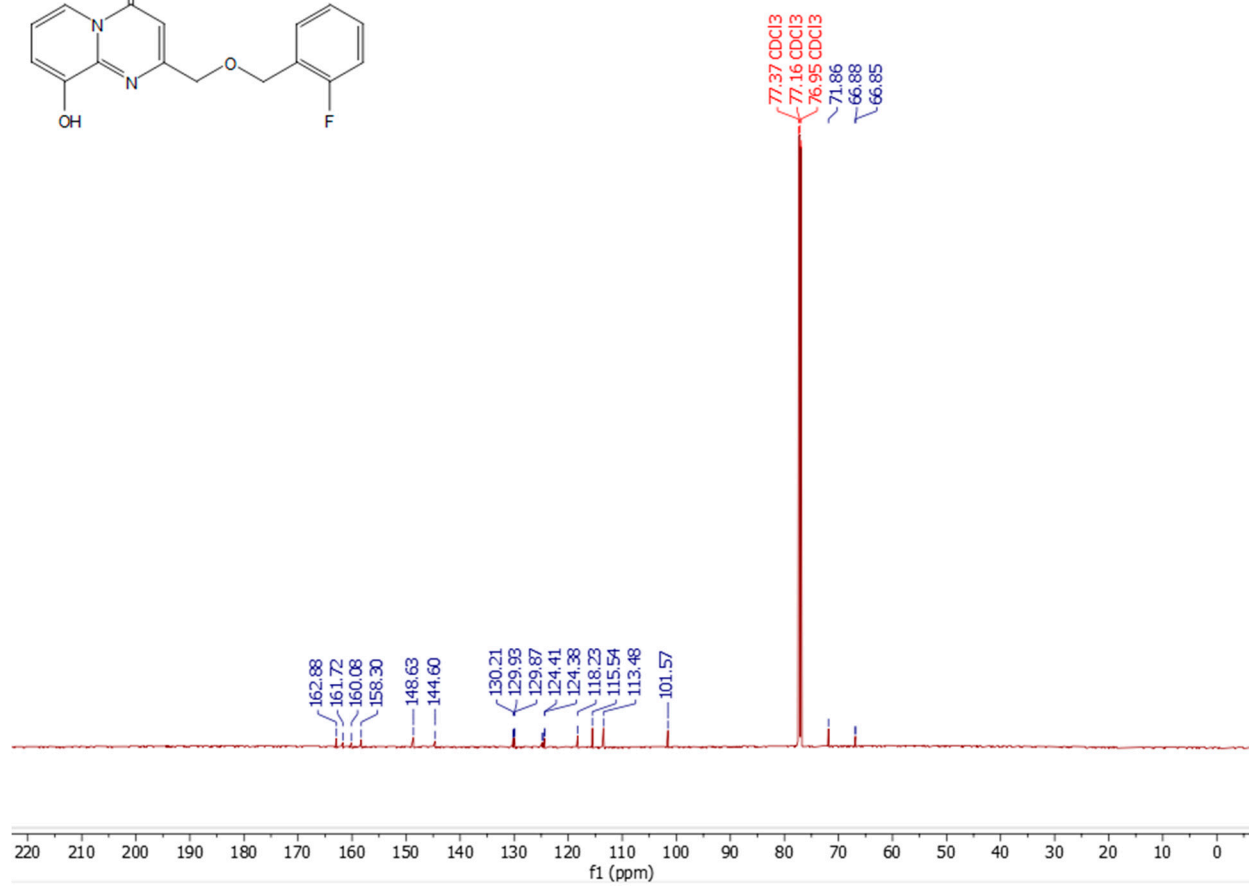

<sup>1</sup>H NMR of **32**

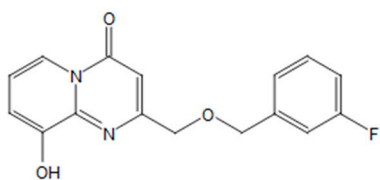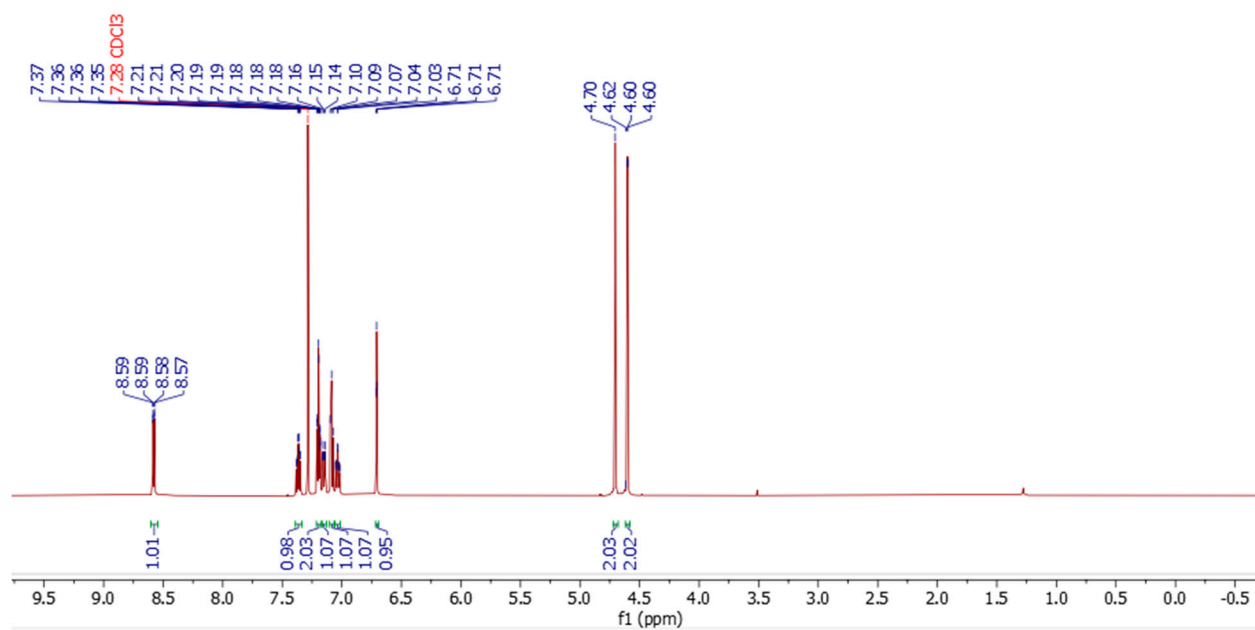

<sup>13</sup>C NMR of **32**

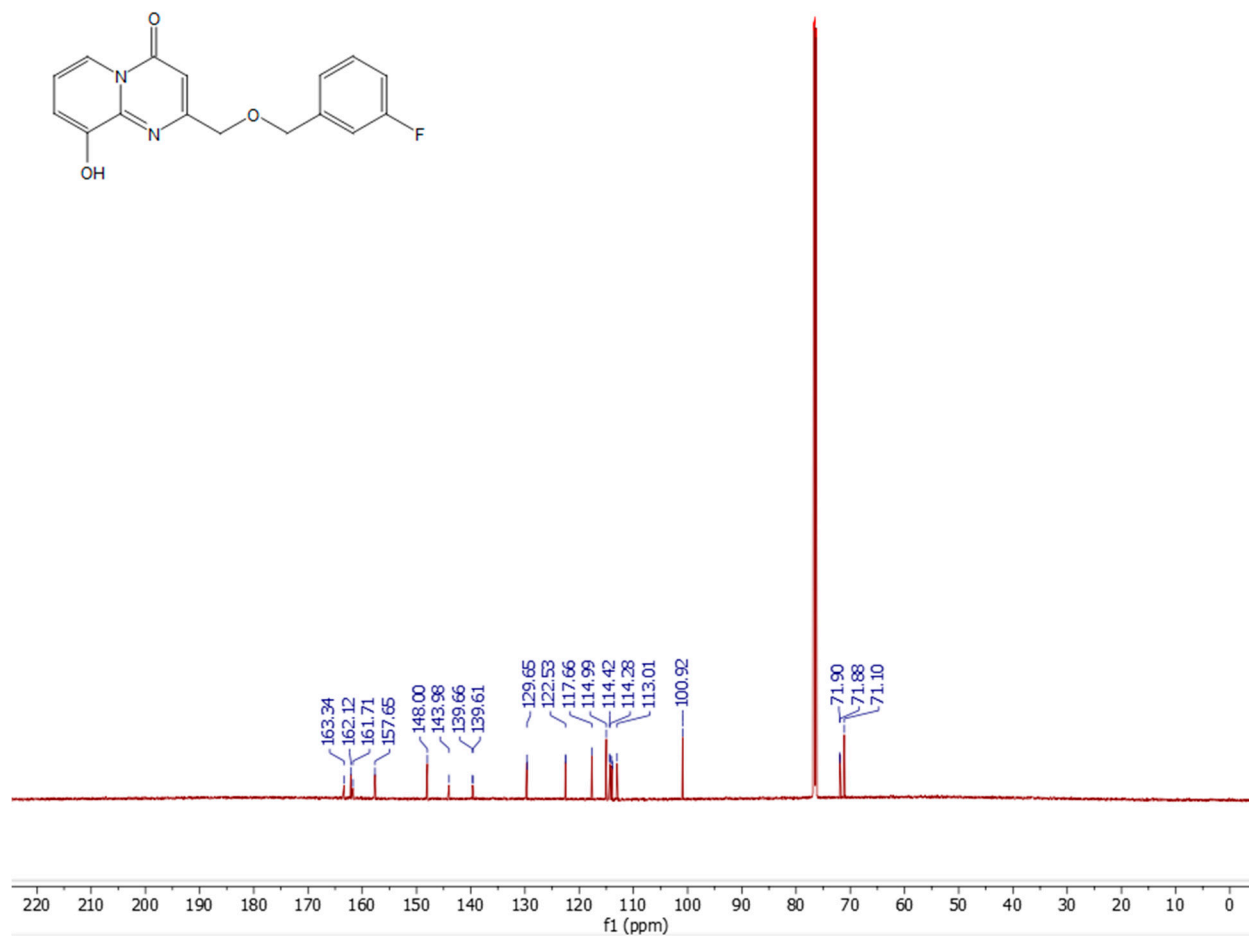

<sup>1</sup>H NMR of **33**

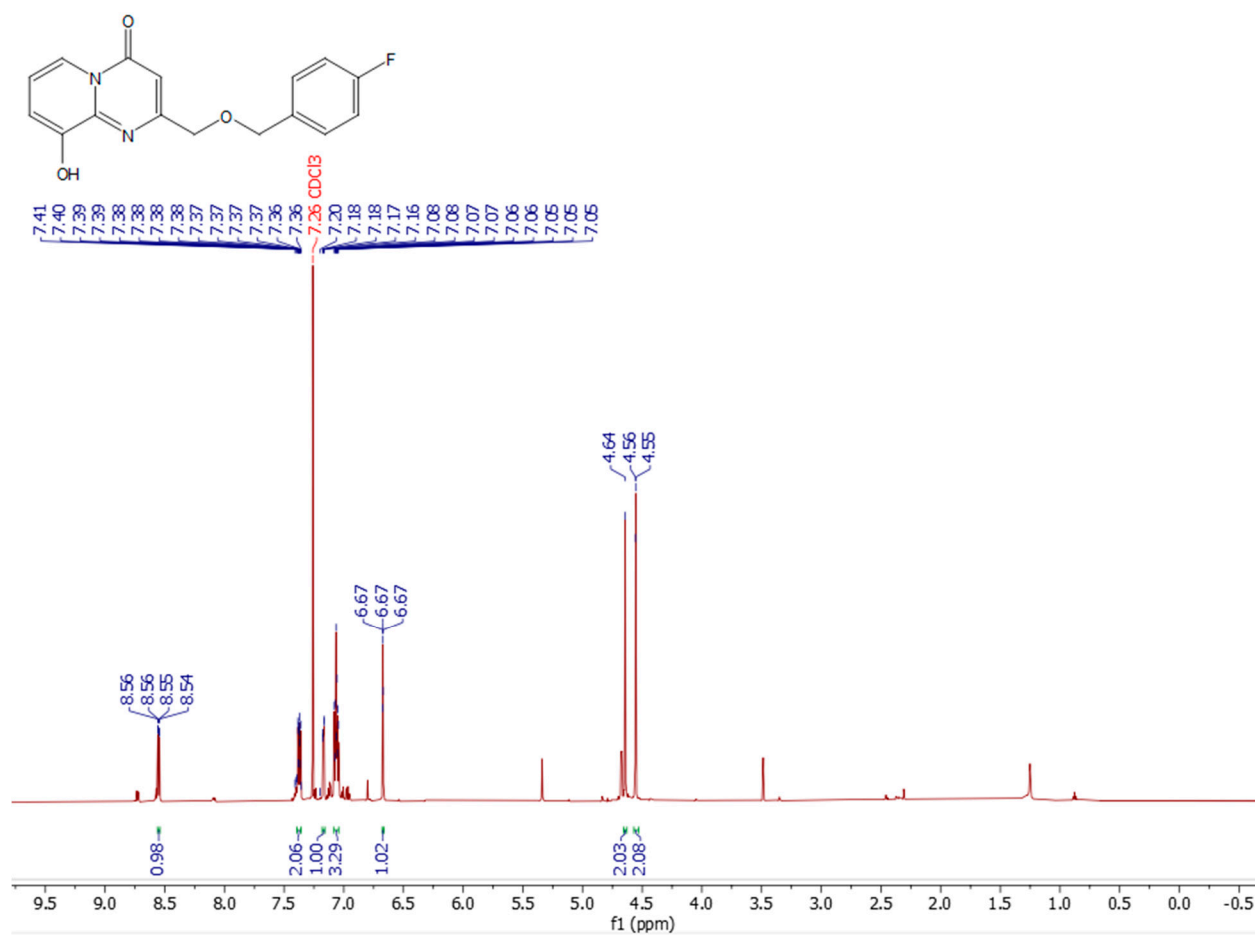

<sup>13</sup>C NMR of **33**

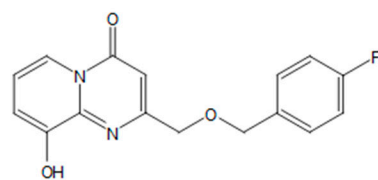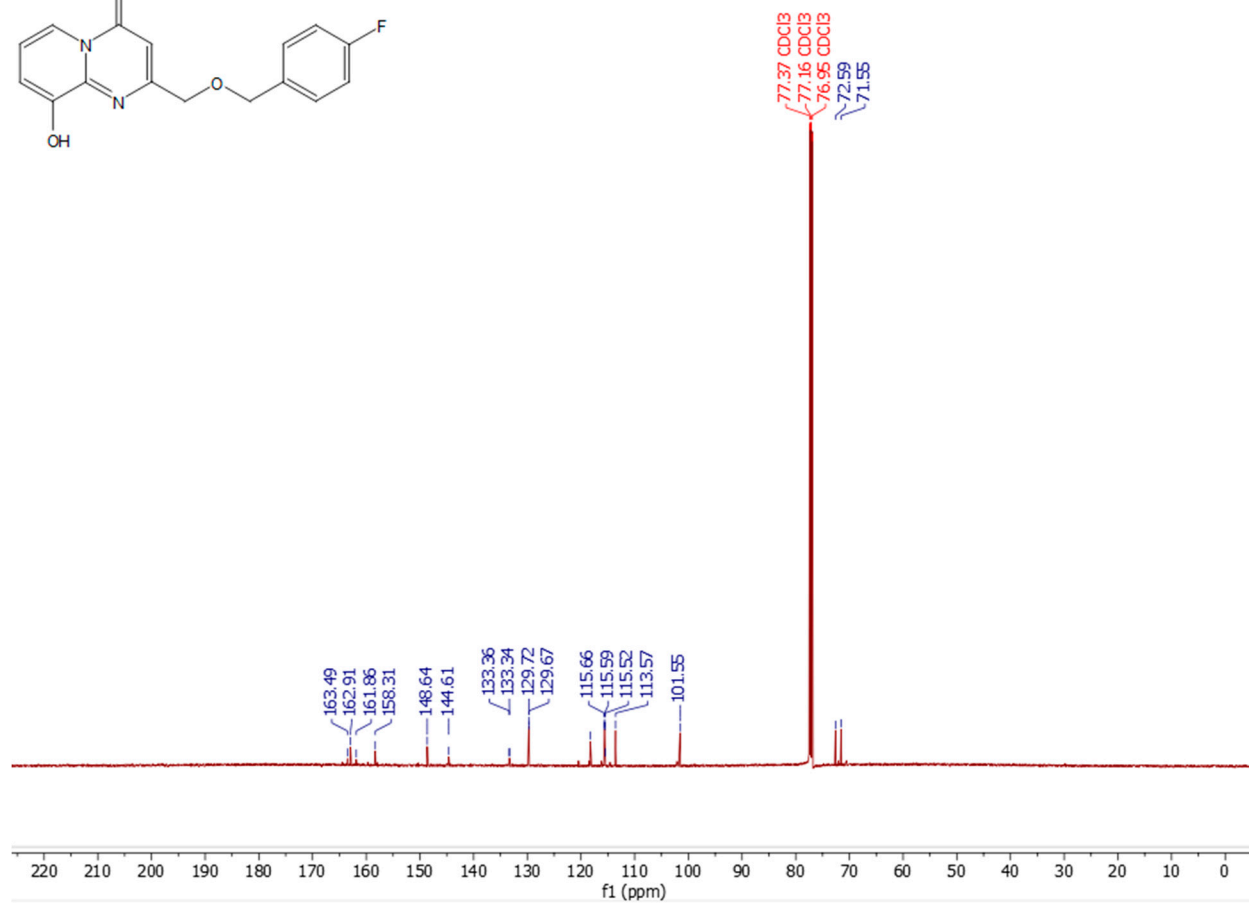

<sup>1</sup>H NMR of **34**

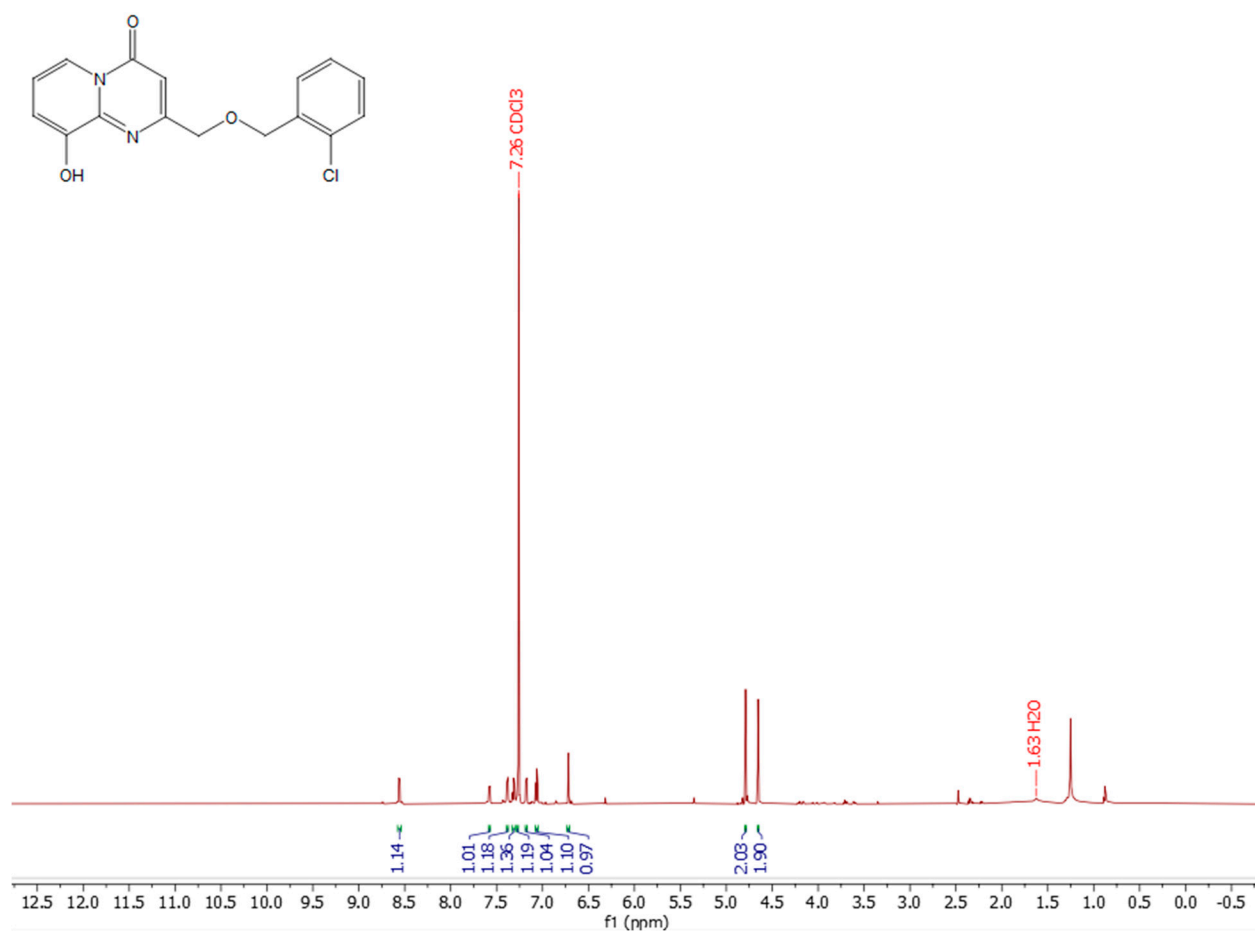

<sup>13</sup>C NMR of **34**

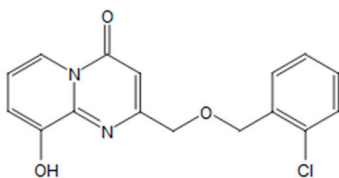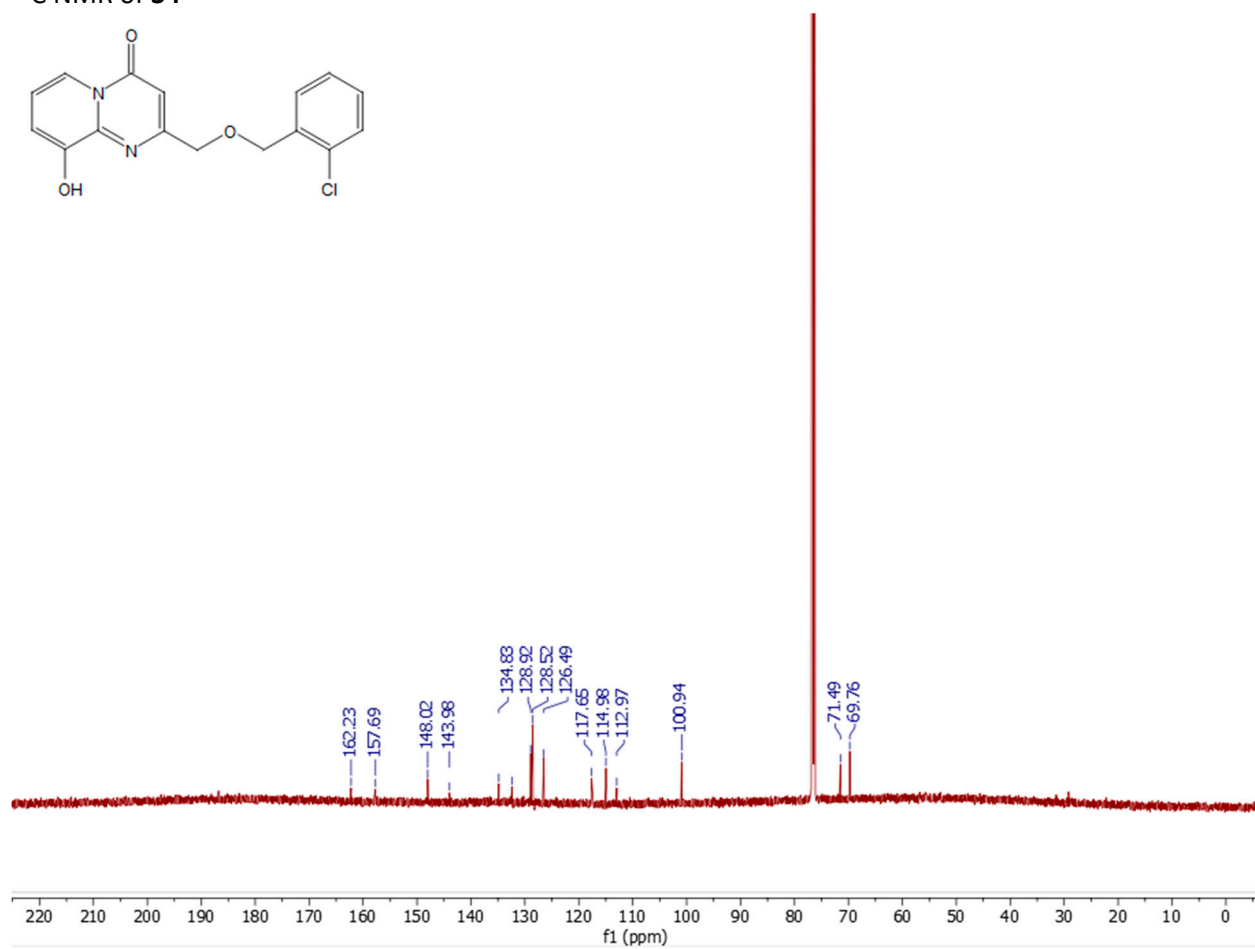

<sup>1</sup>H NMR of **35**

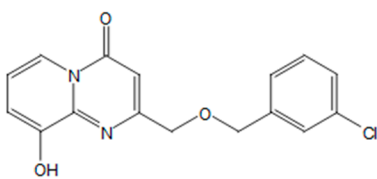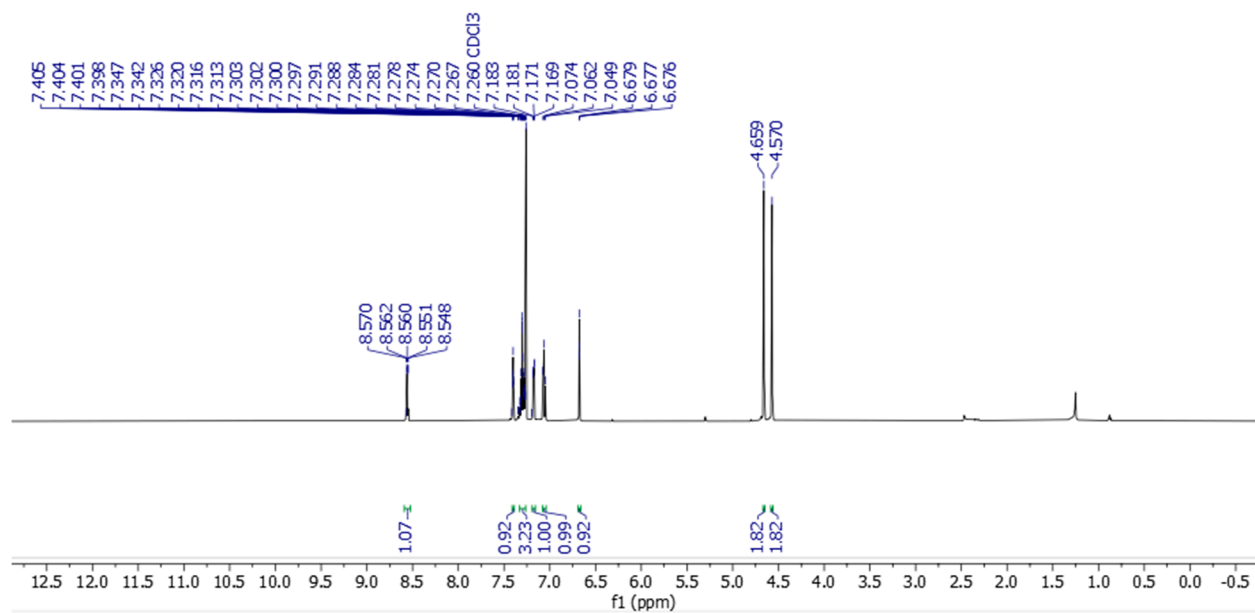



<sup>13</sup>C NMR of **35**

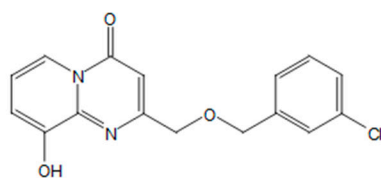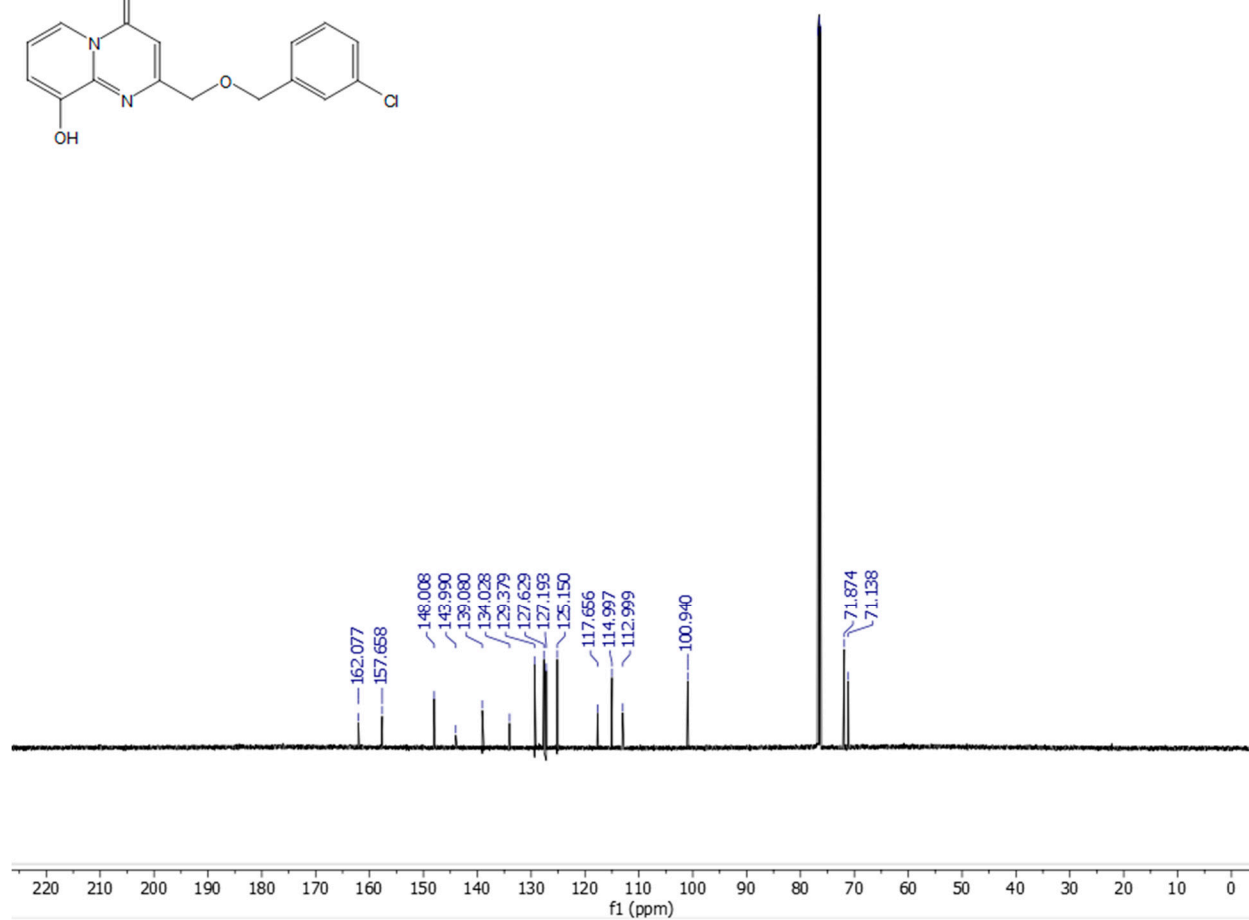

<sup>1</sup>H NMR of **38**

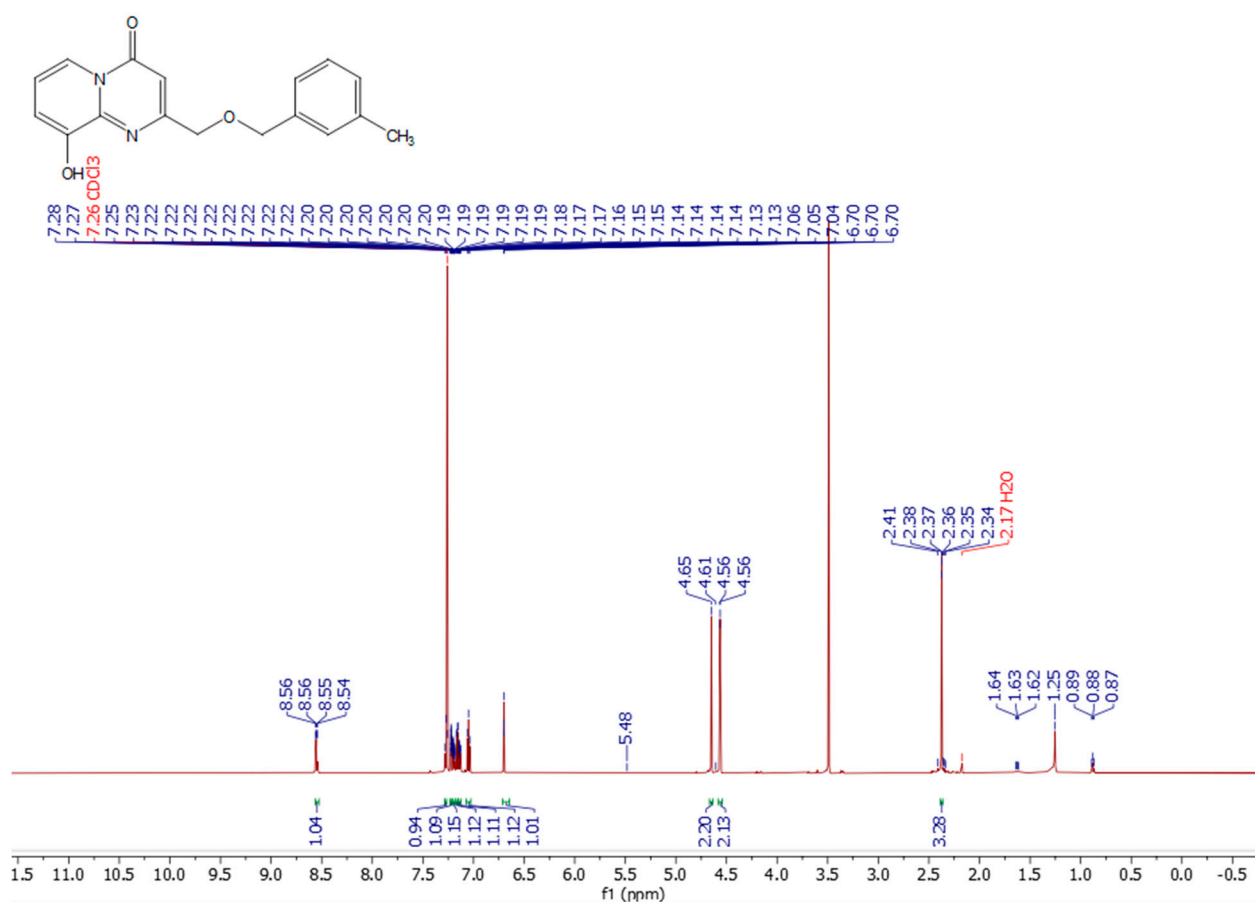

<sup>13</sup>C NMR of **38**

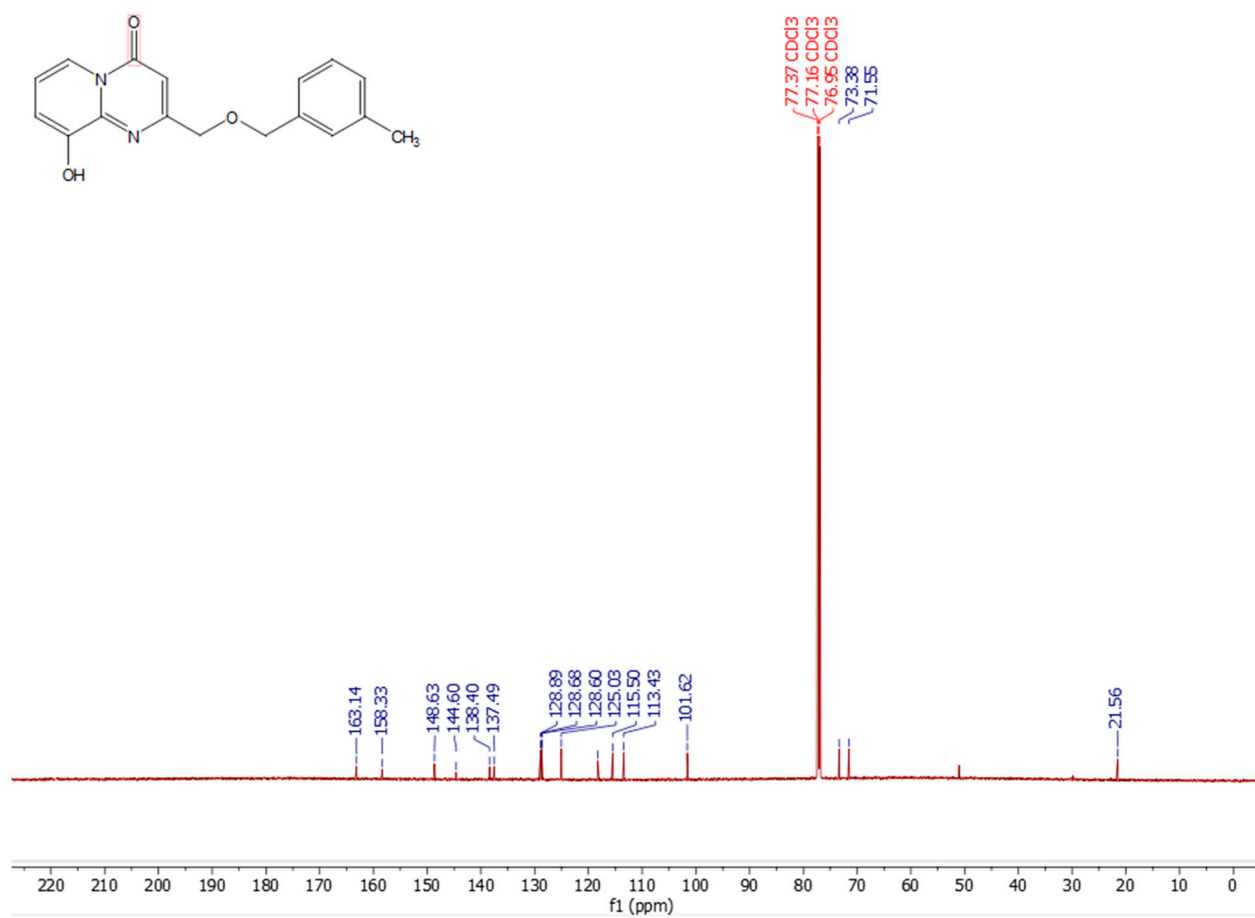

<sup>1</sup>H NMR of **39**

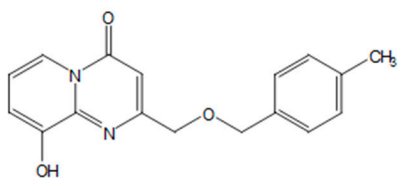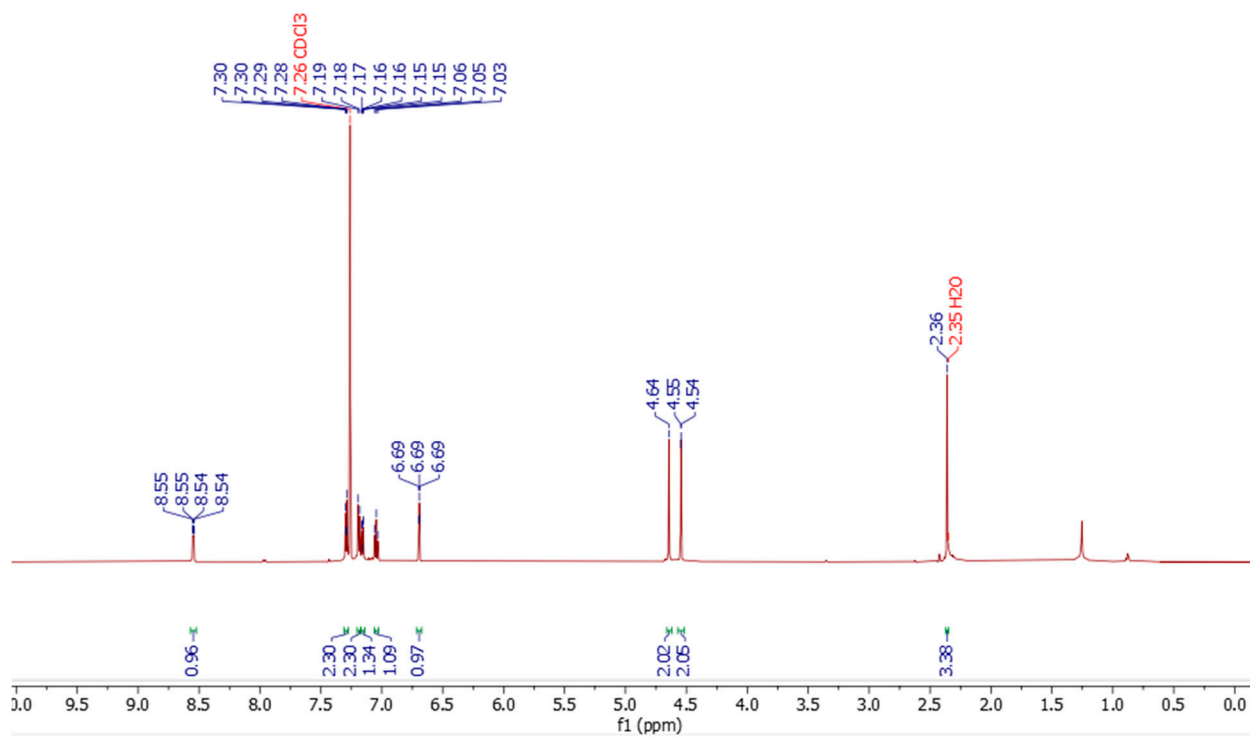

<sup>13</sup>C NMR of **39**

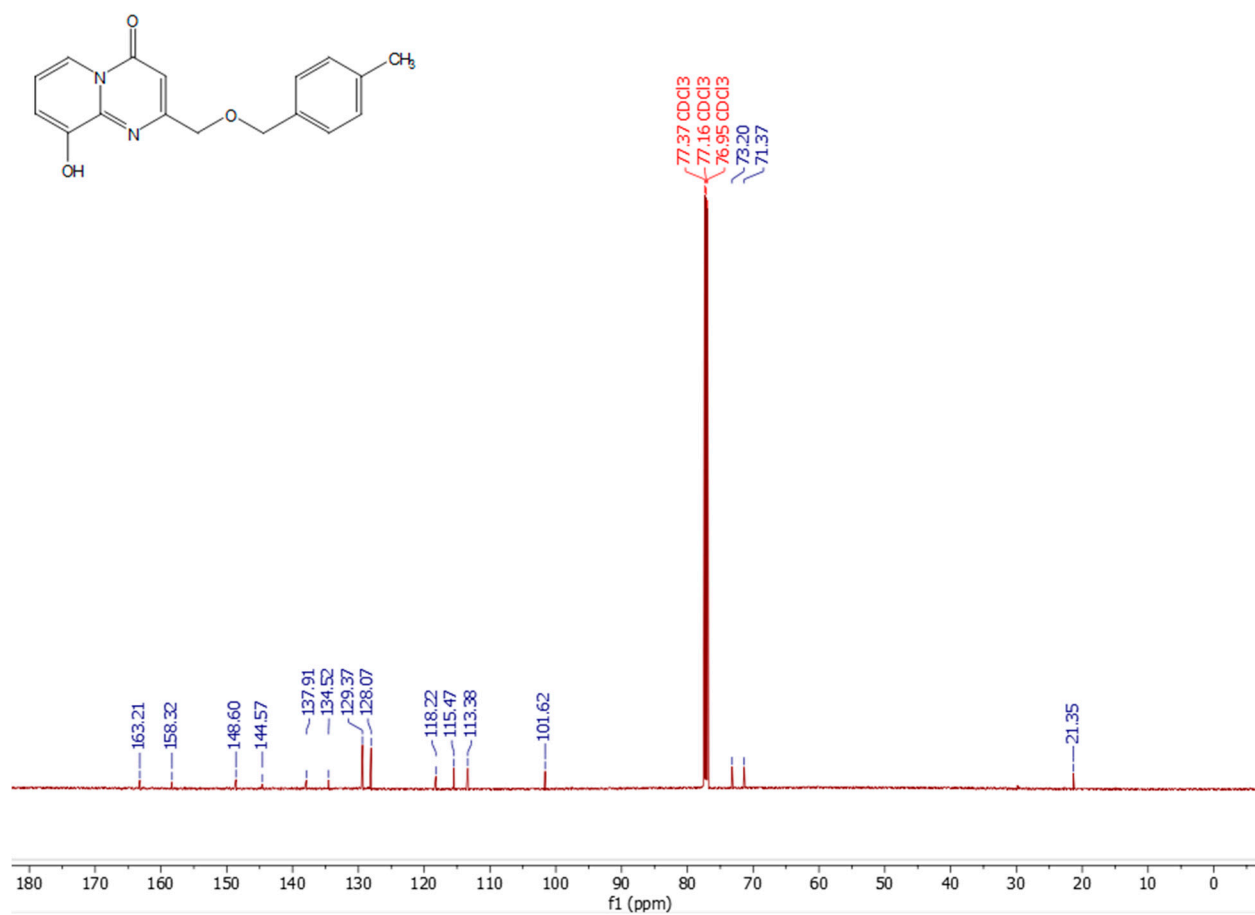

<sup>1</sup>H NMR of **40**

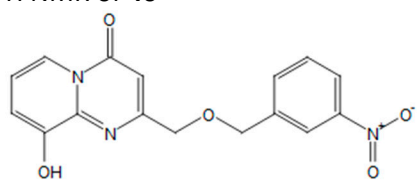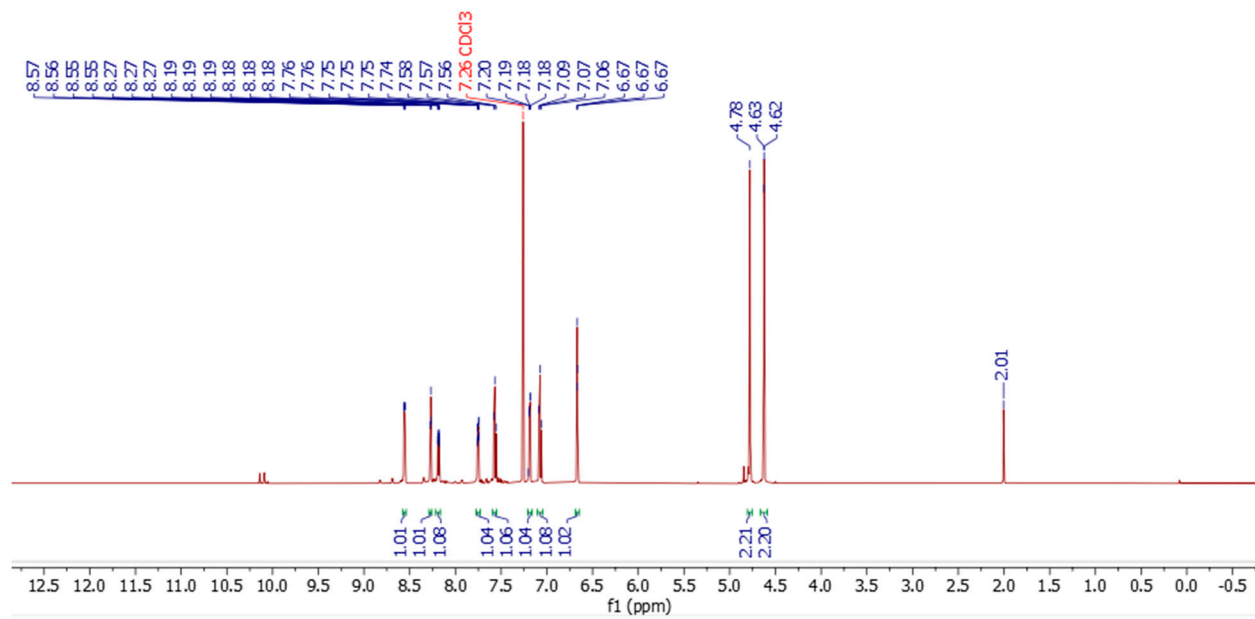

<sup>13</sup>C NMR of **40**

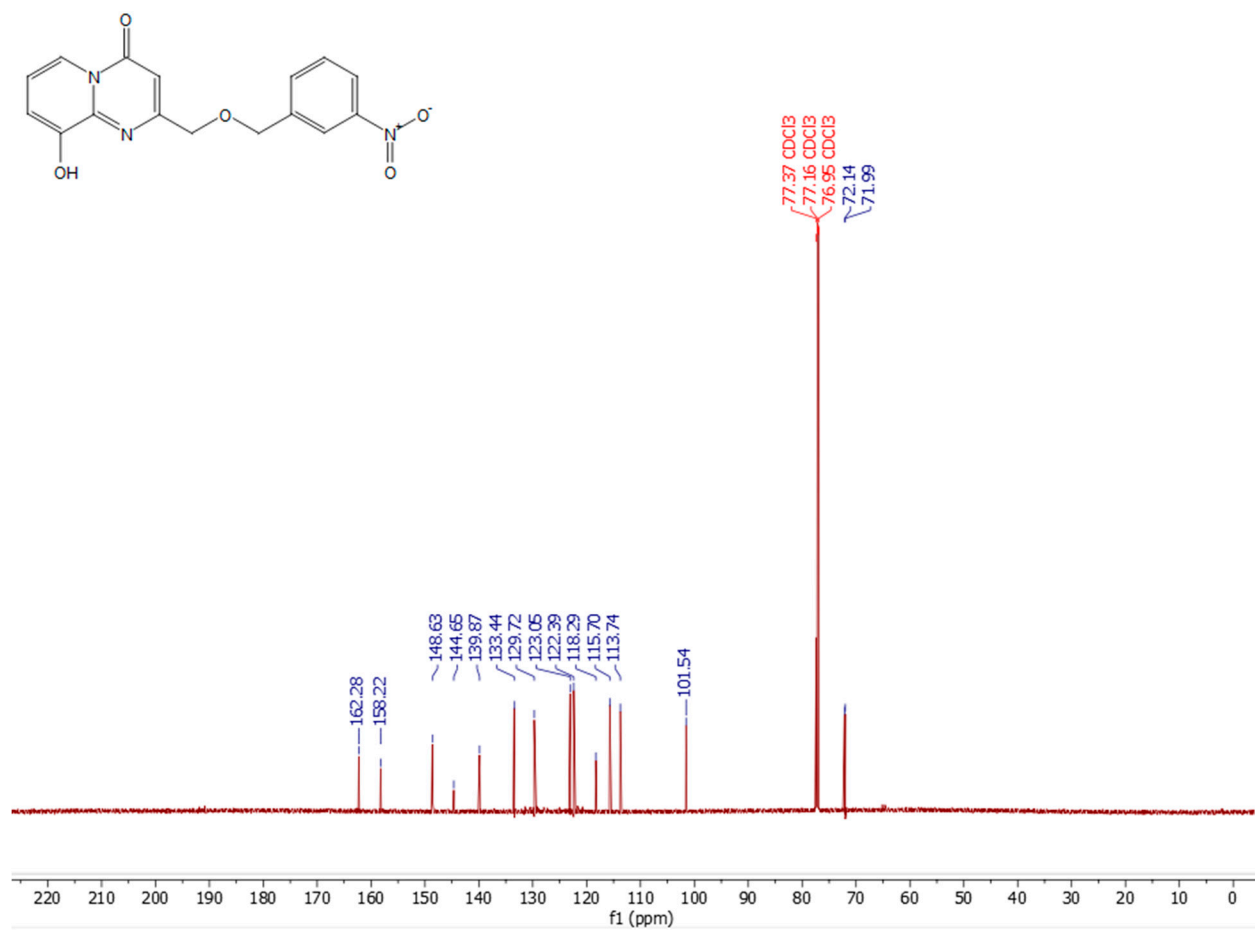

<sup>1</sup>H NMR of **41**

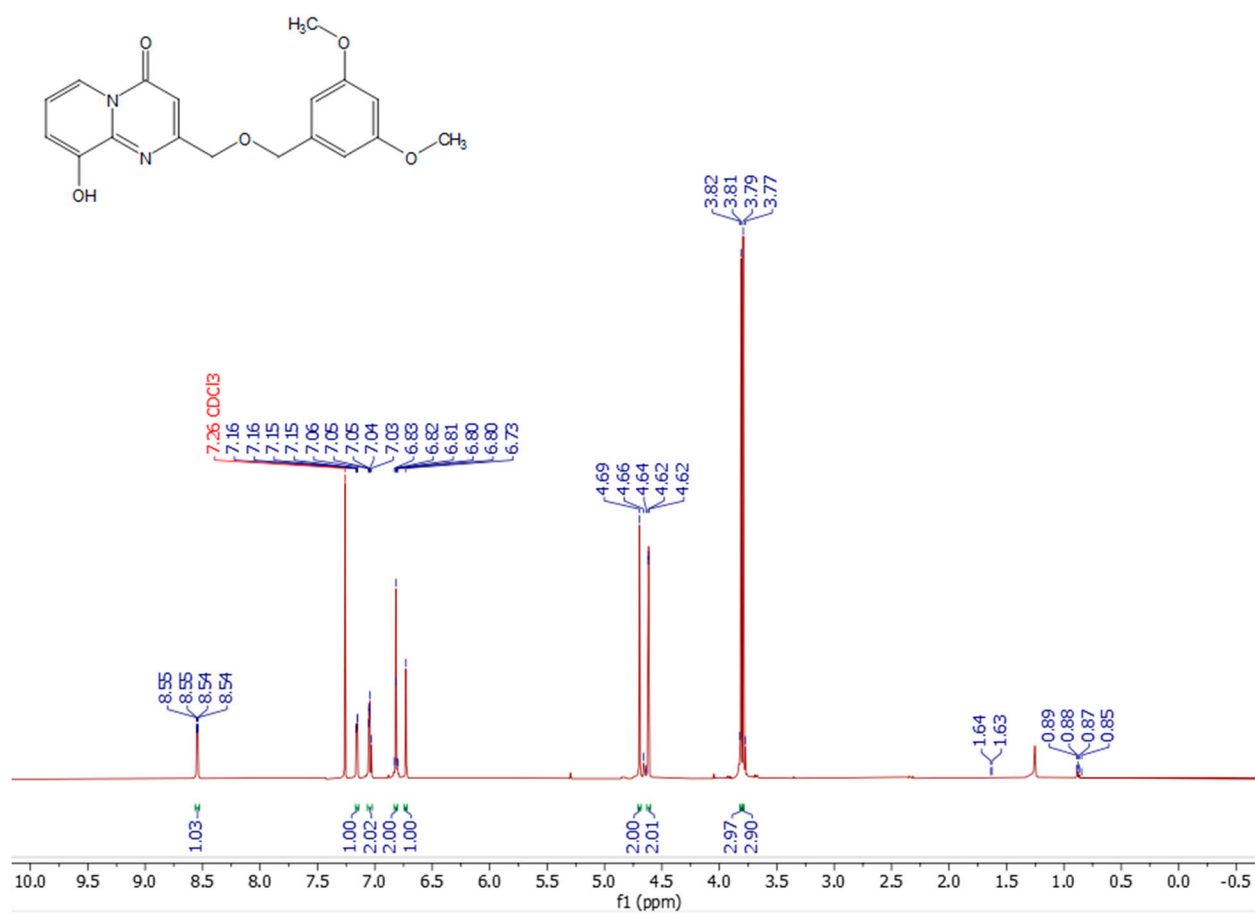



<sup>13</sup>C NMR of **41**

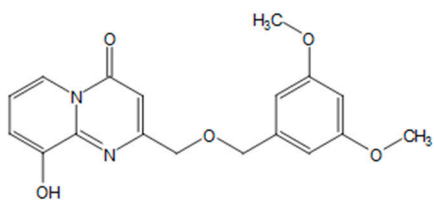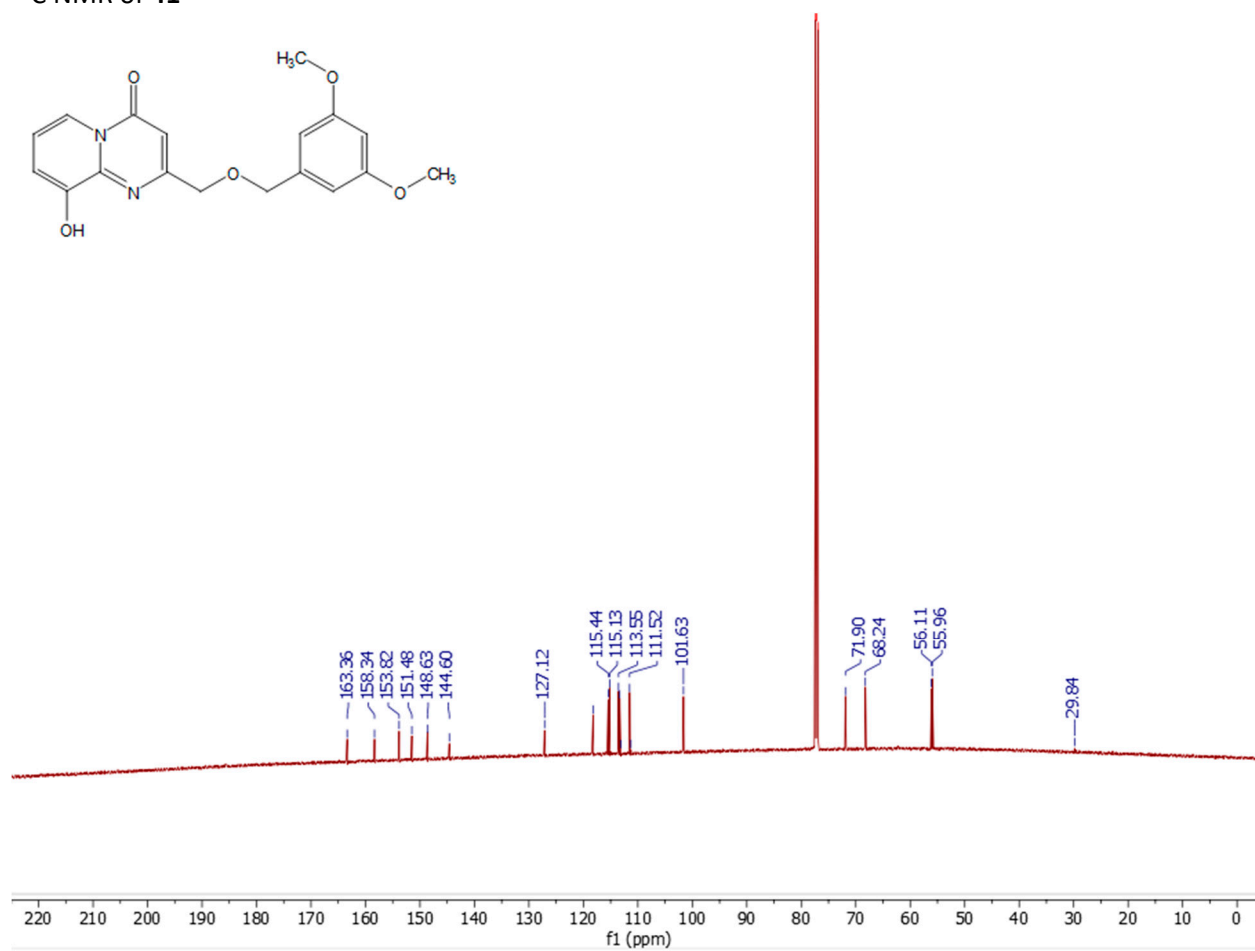

<sup>1</sup>H NMR of **43**

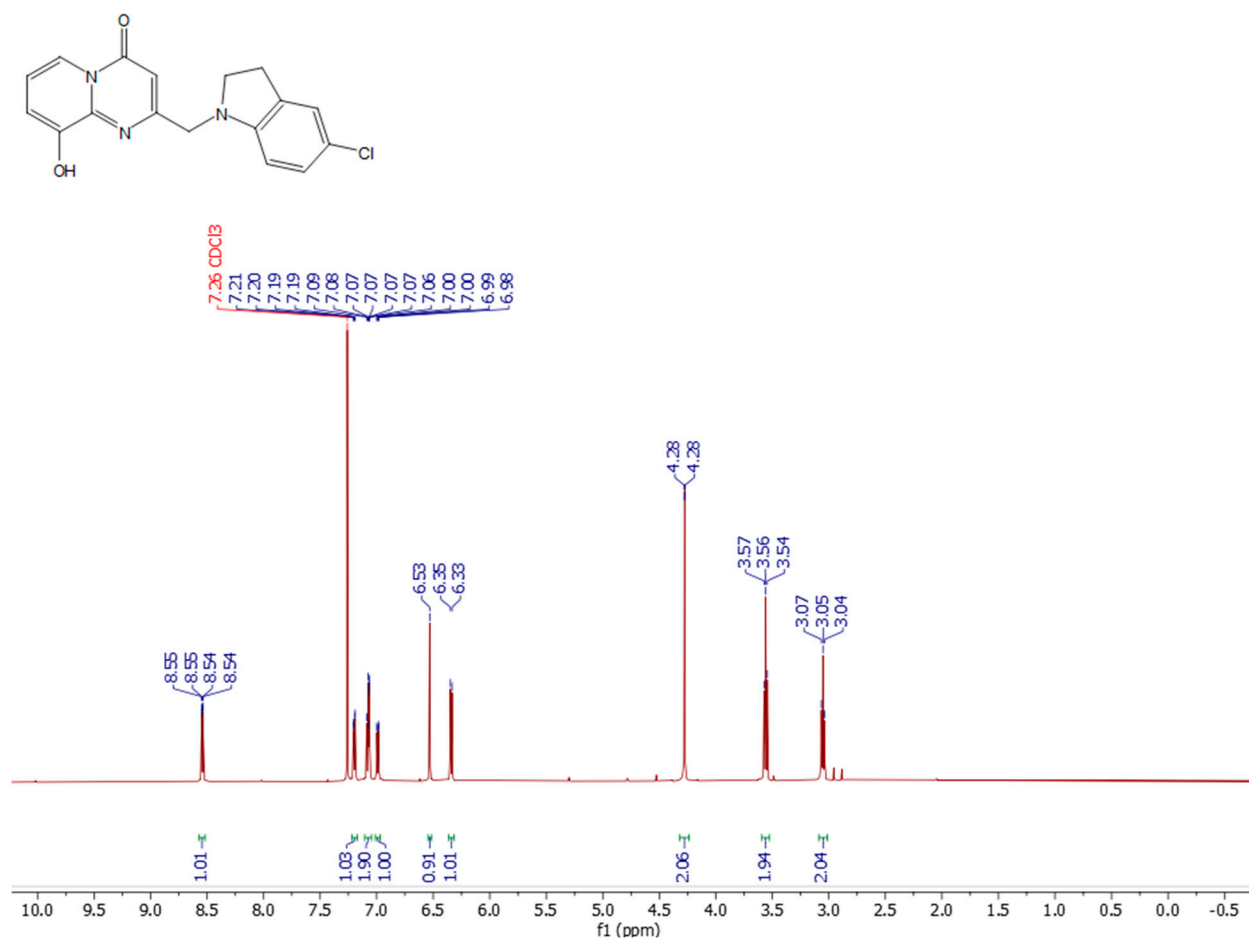

<sup>13</sup>C NMR of **43**

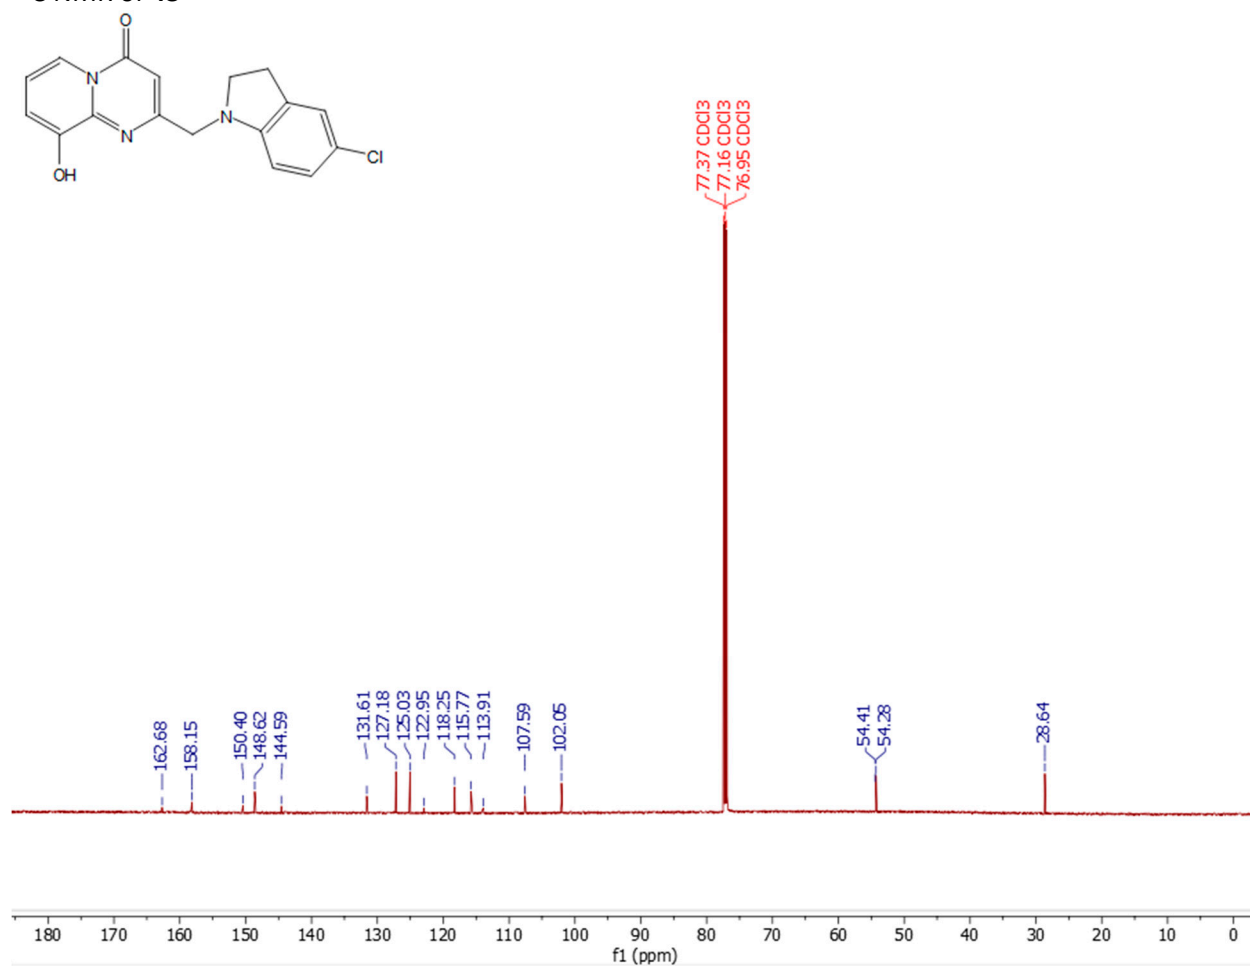

<sup>1</sup>H NMR of **44**

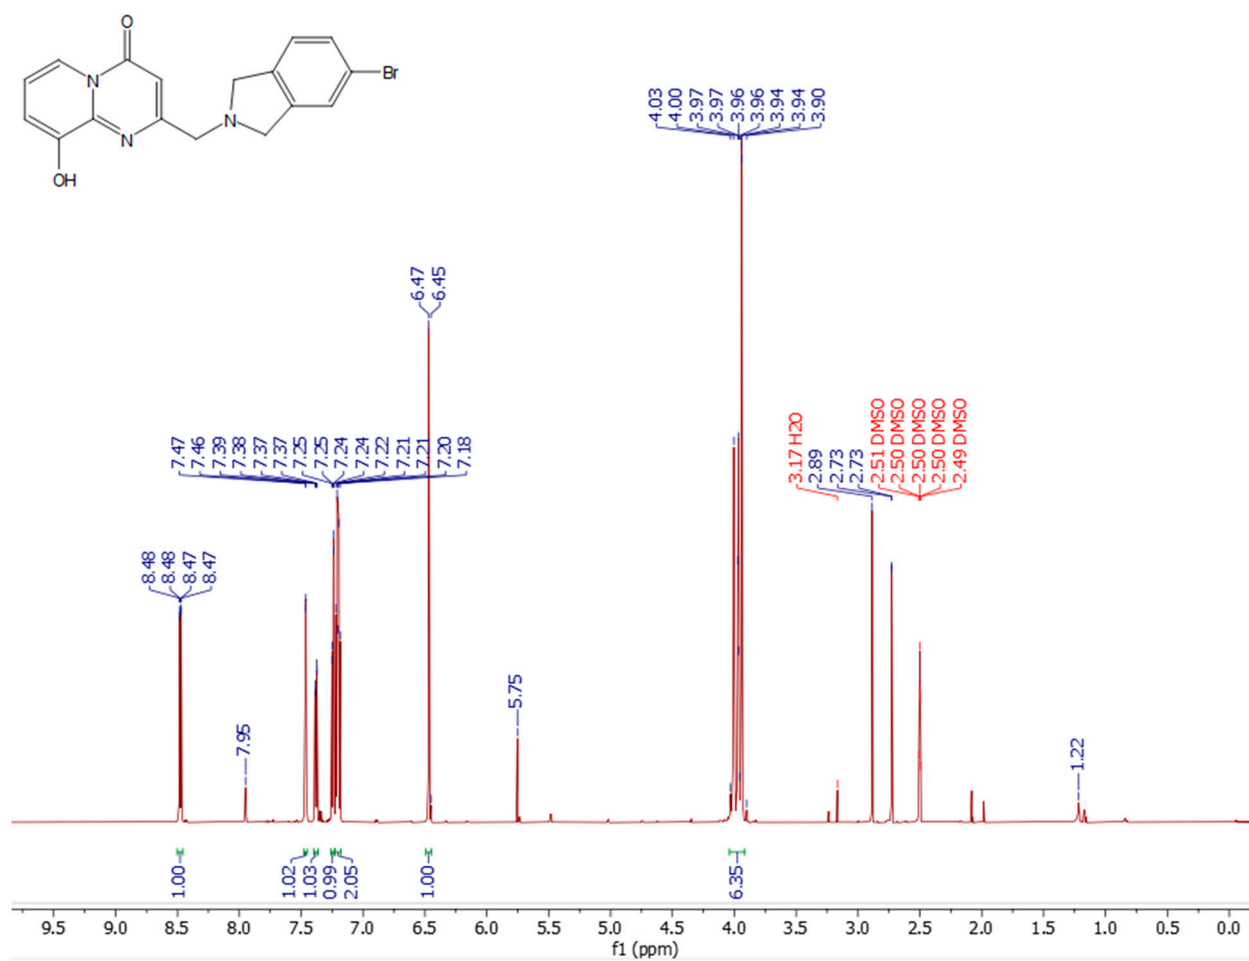

<sup>13</sup>C NMR of **44**

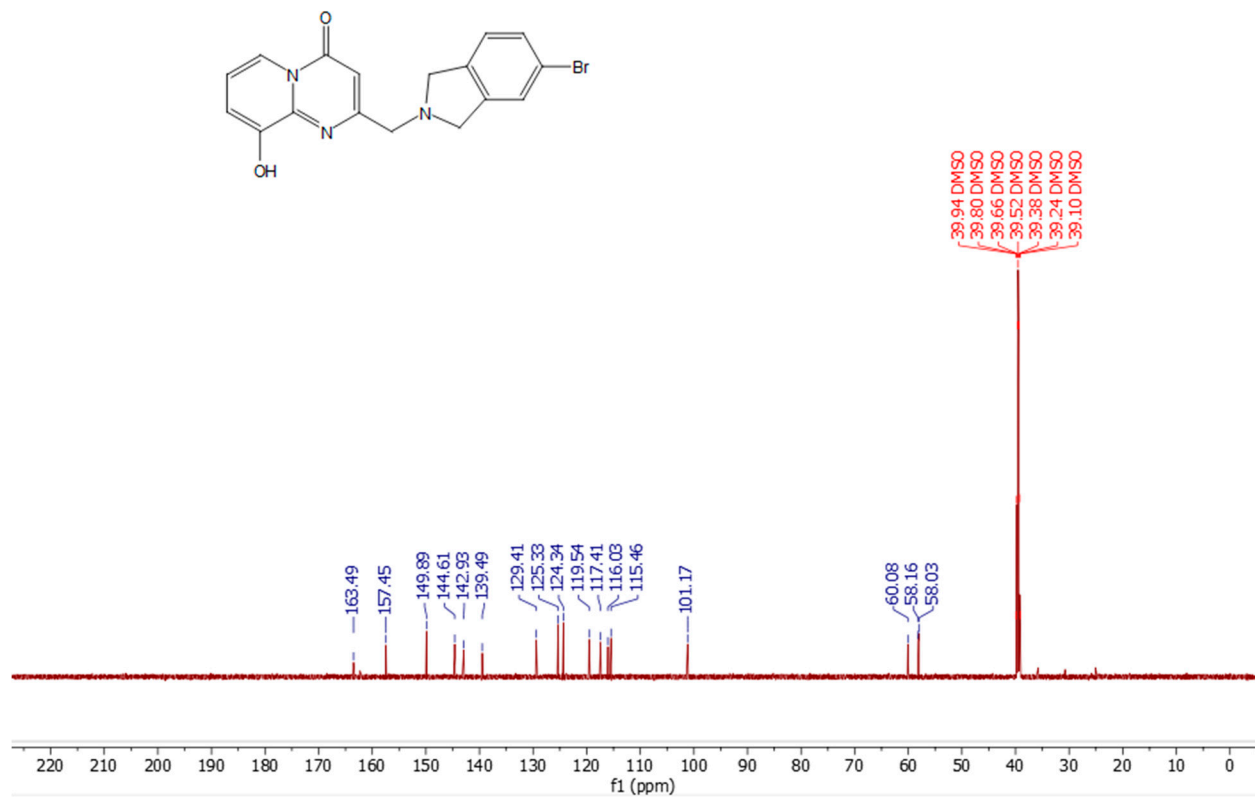

<sup>1</sup>H NMR of **45**

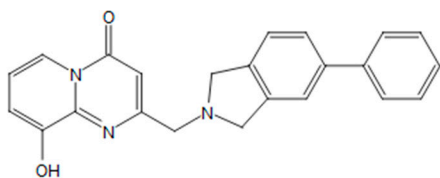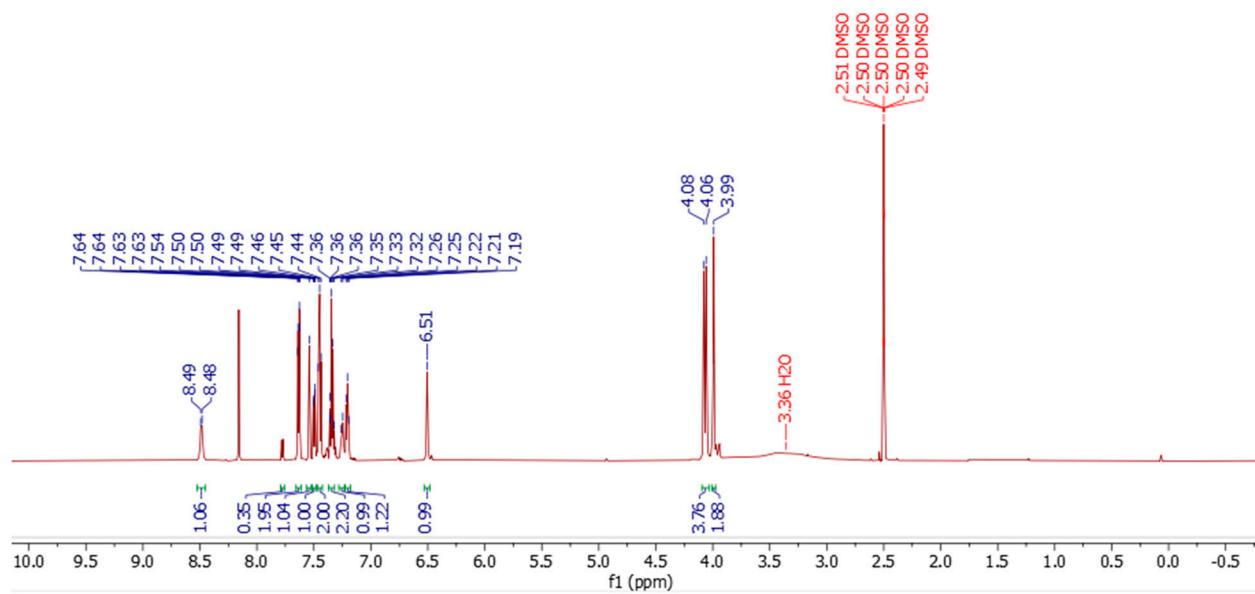

<sup>13</sup>C NMR of **45**

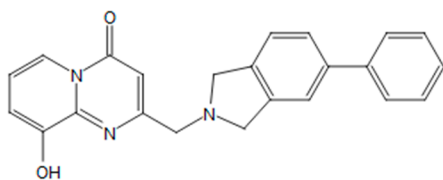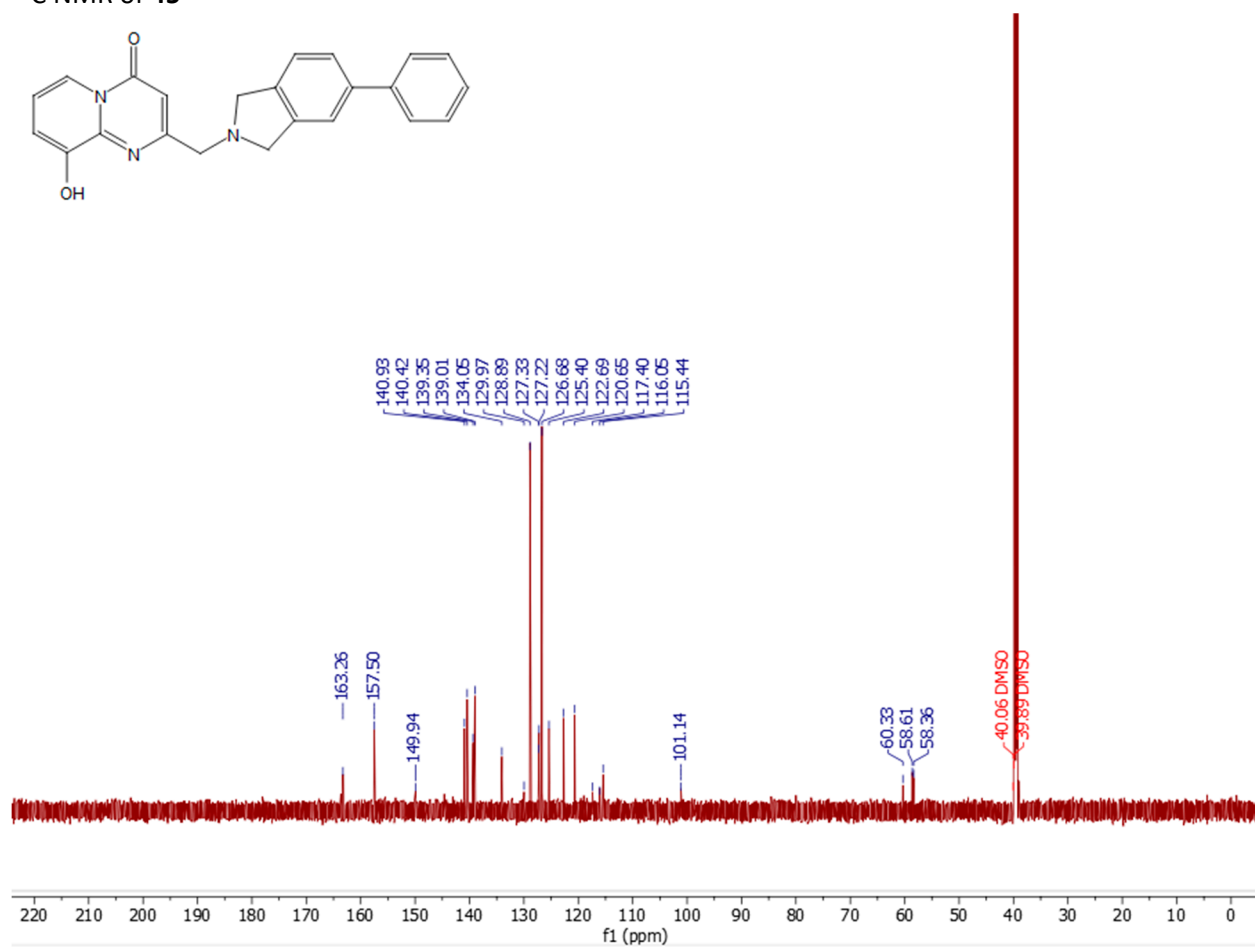

<sup>1</sup>H NMR of 46

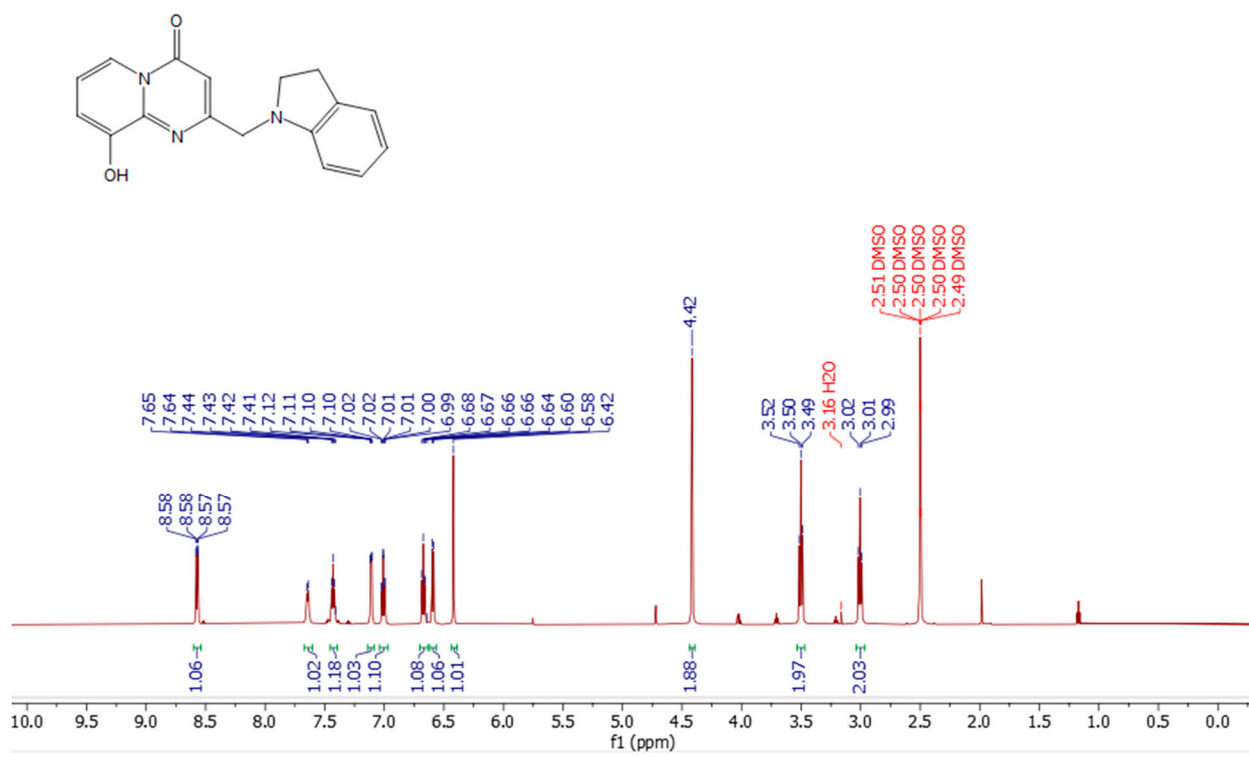



$^{13}\text{C}$  NMR of **46**

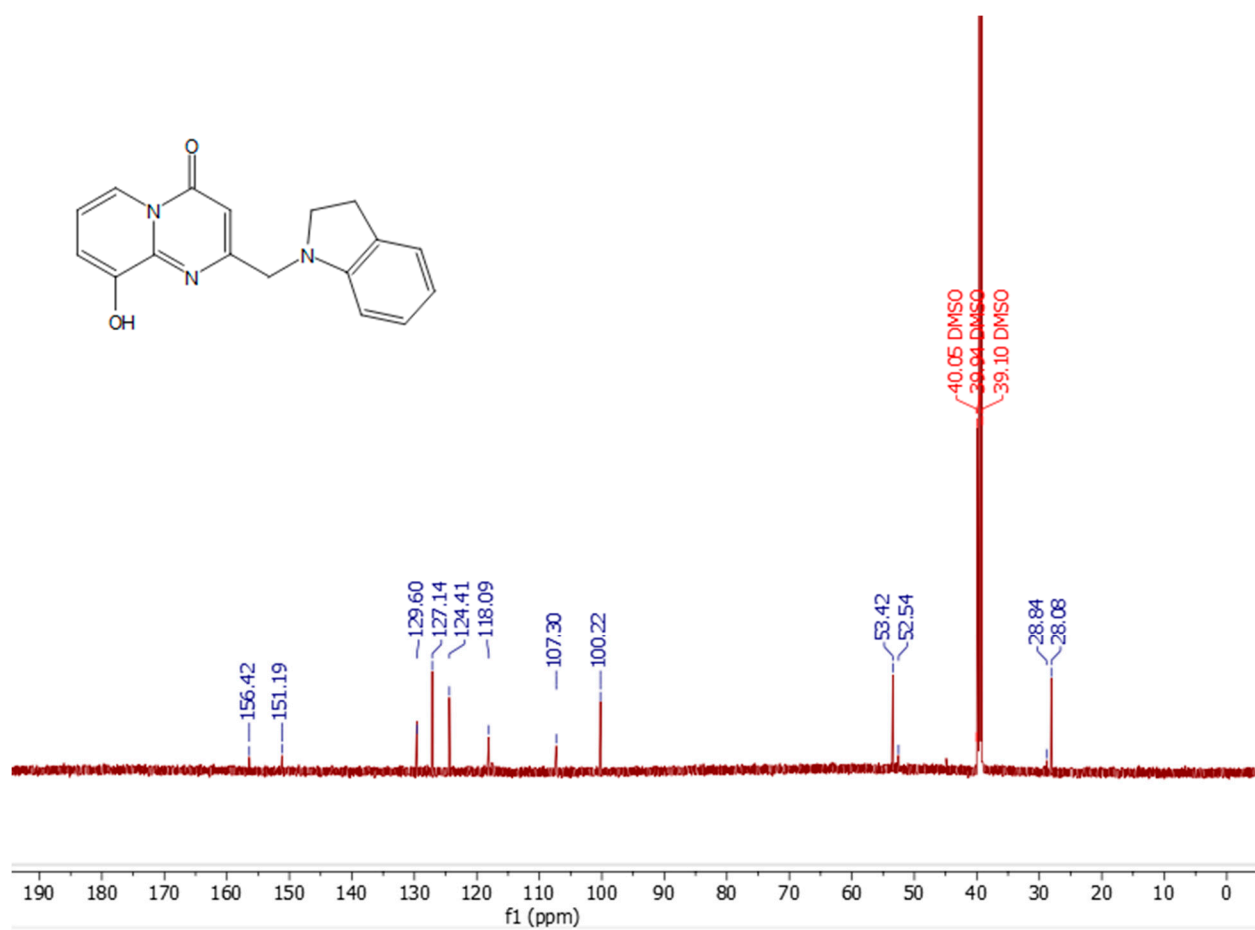

<sup>1</sup>H NMR of **47**

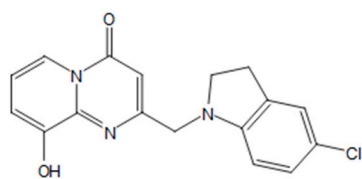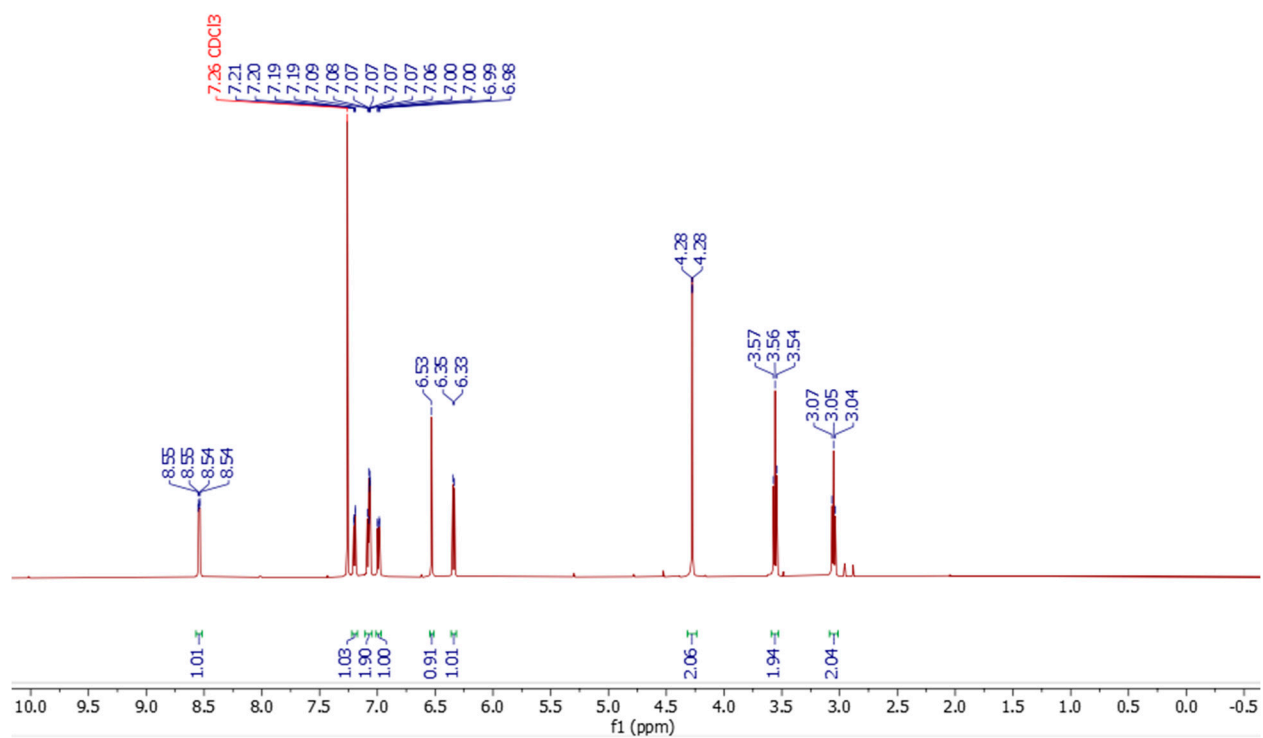

<sup>13</sup>C NMR of **47**

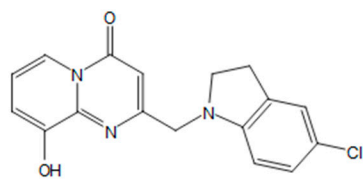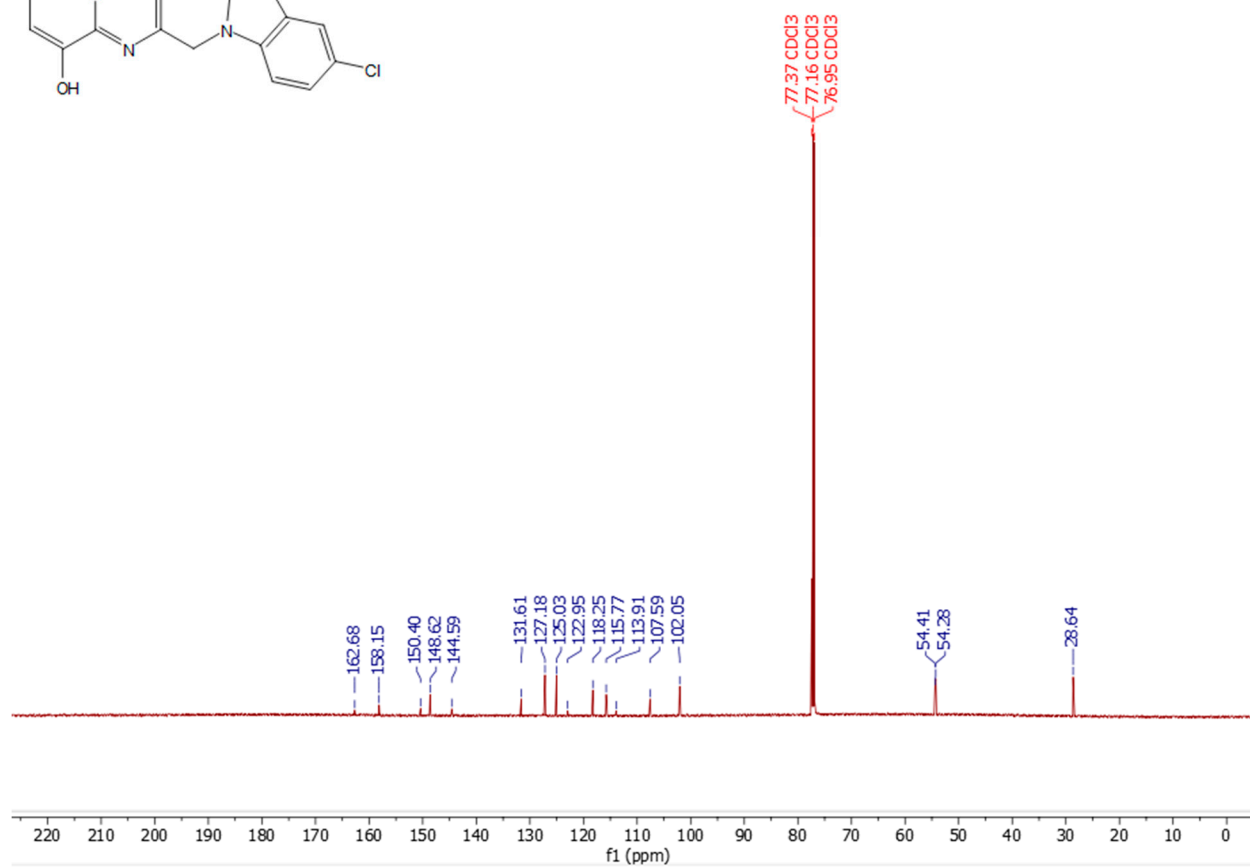

<sup>1</sup>H NMR of **48**

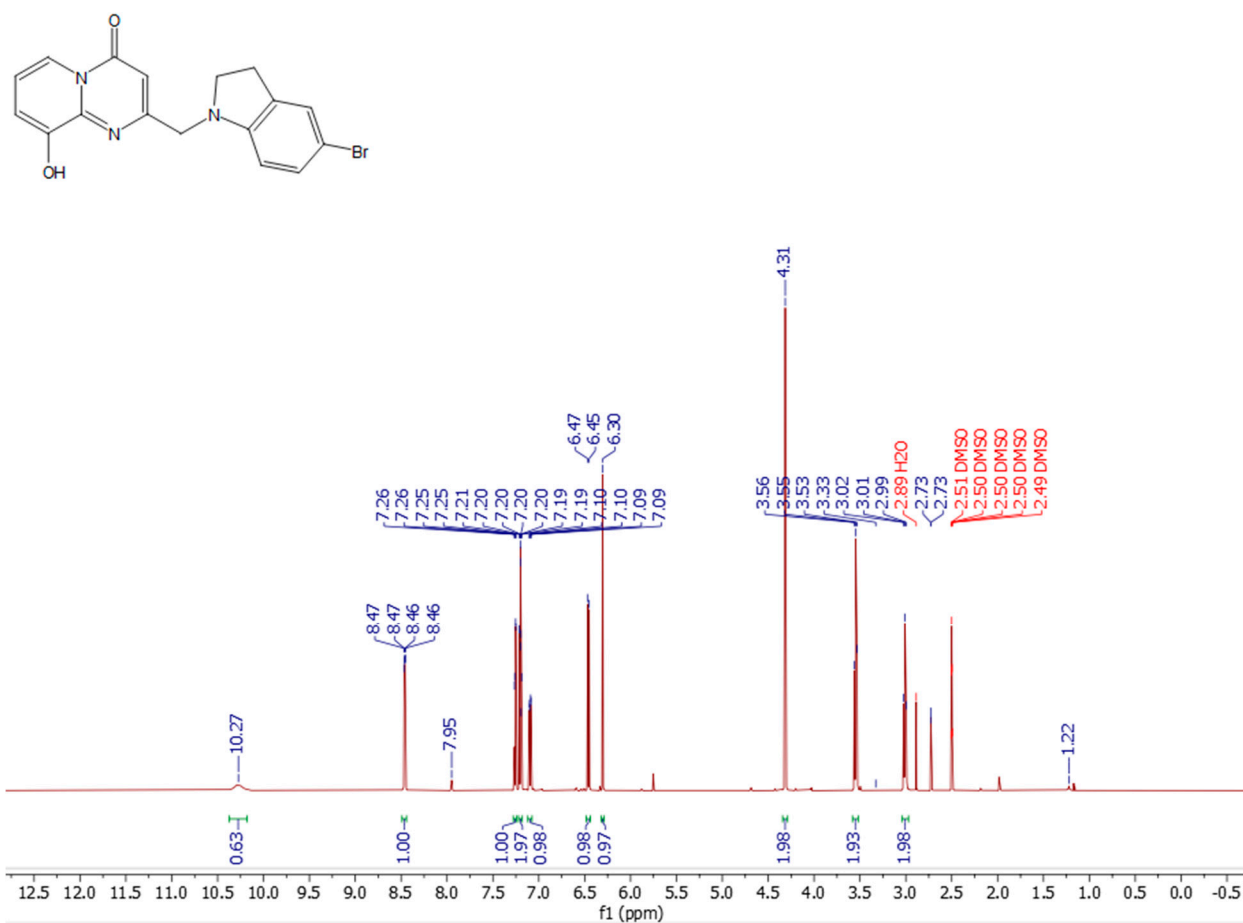

<sup>13</sup>C NMR of **48**

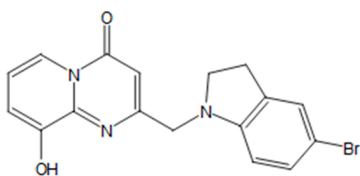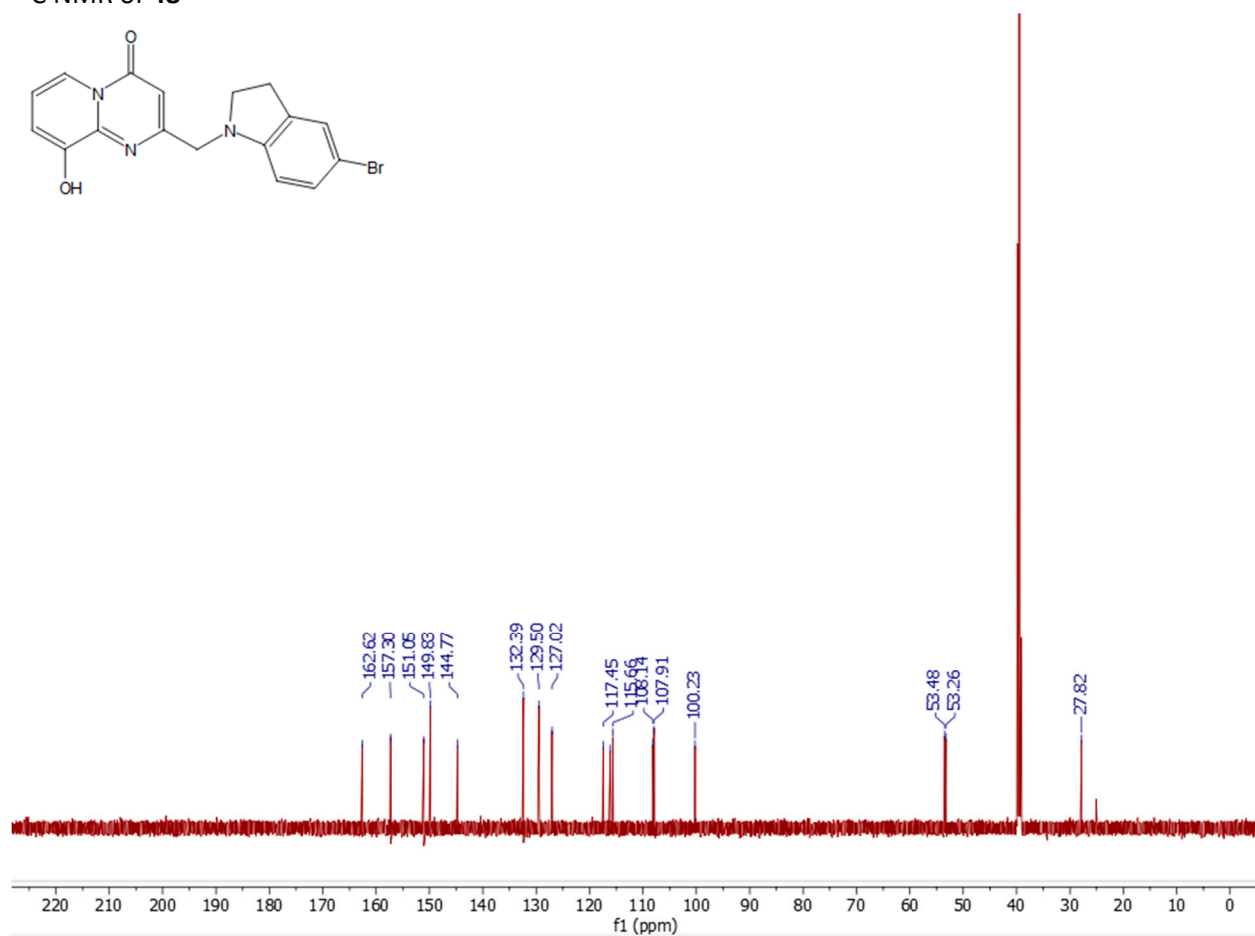

<sup>1</sup>H NMR of **49**

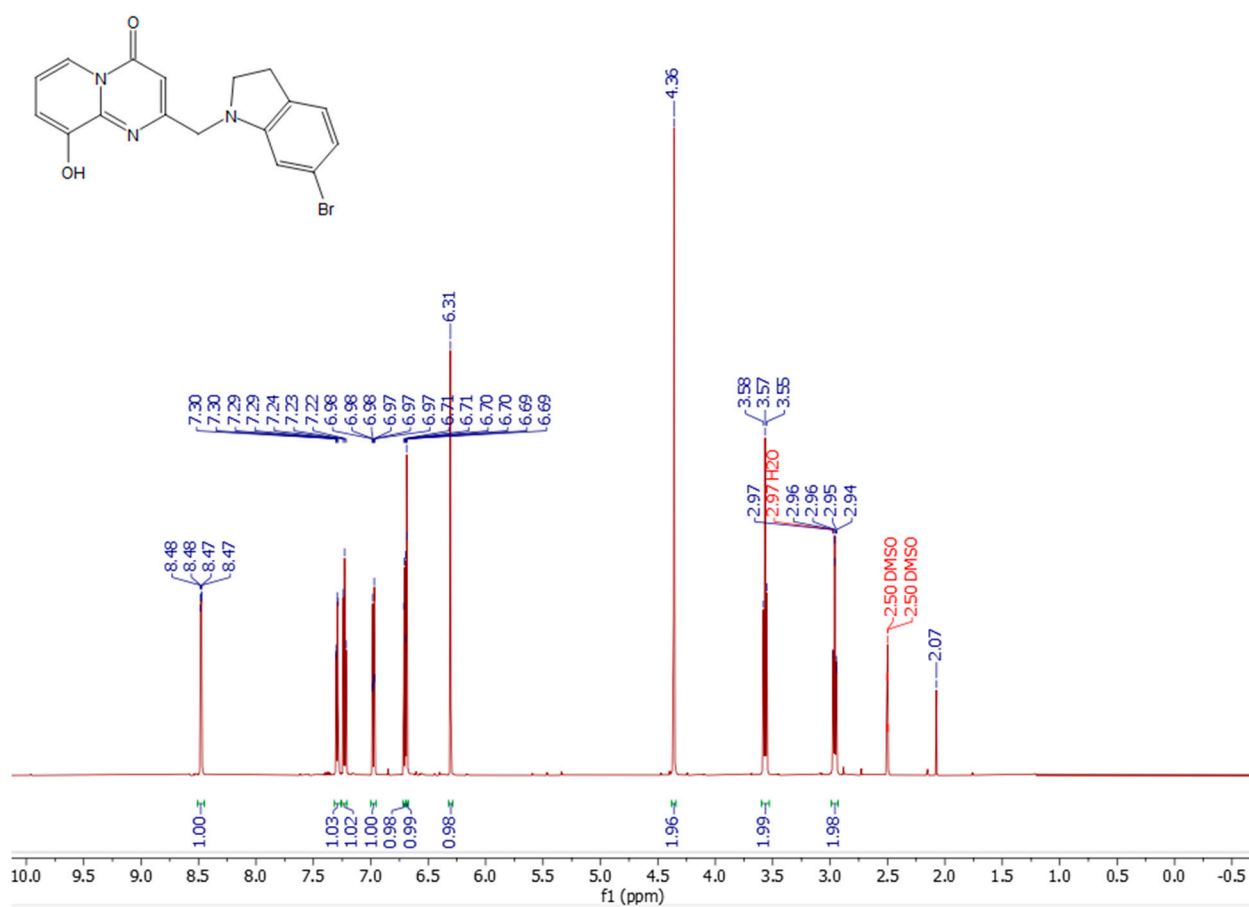

<sup>13</sup>C NMR of **49**

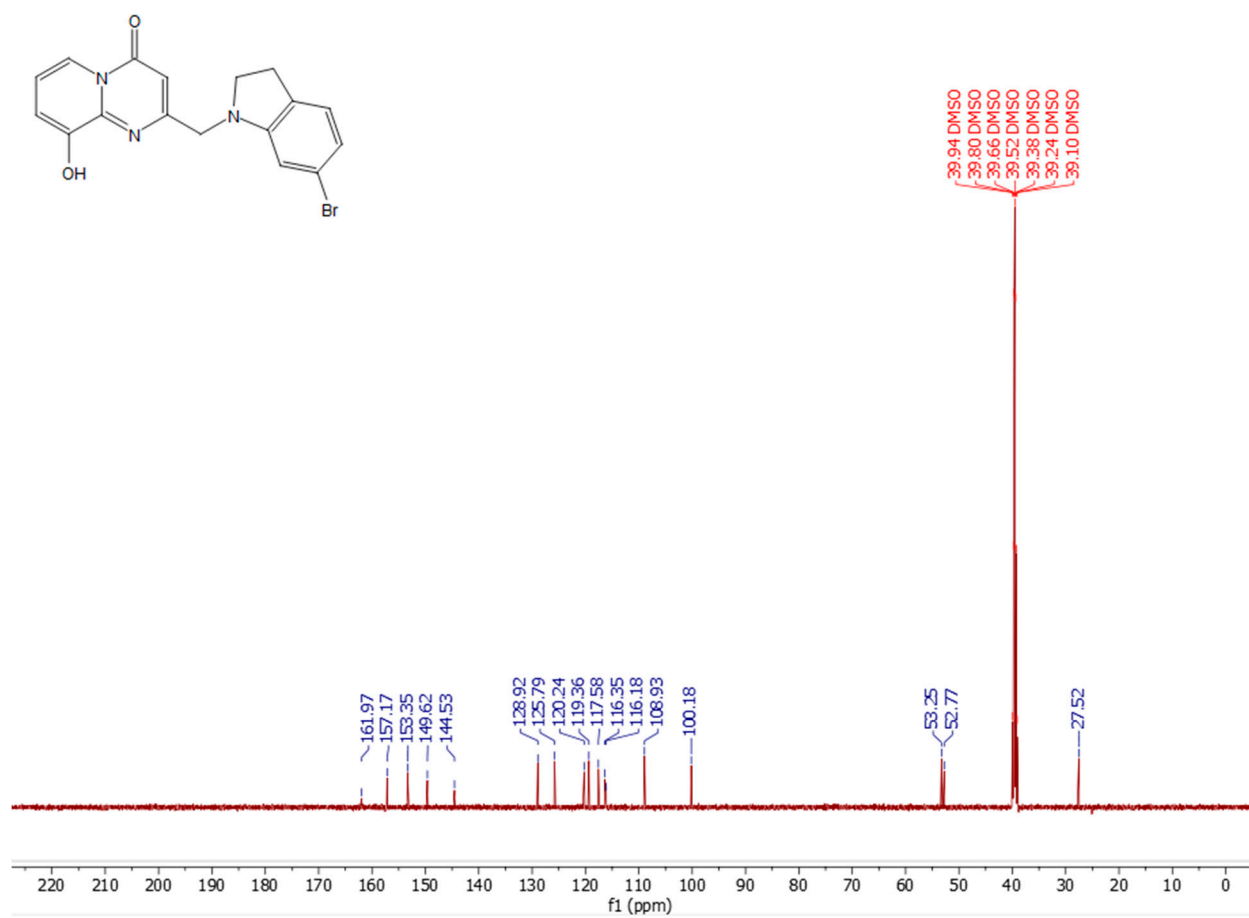

<sup>1</sup>H NMR of **50**

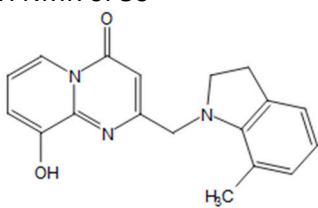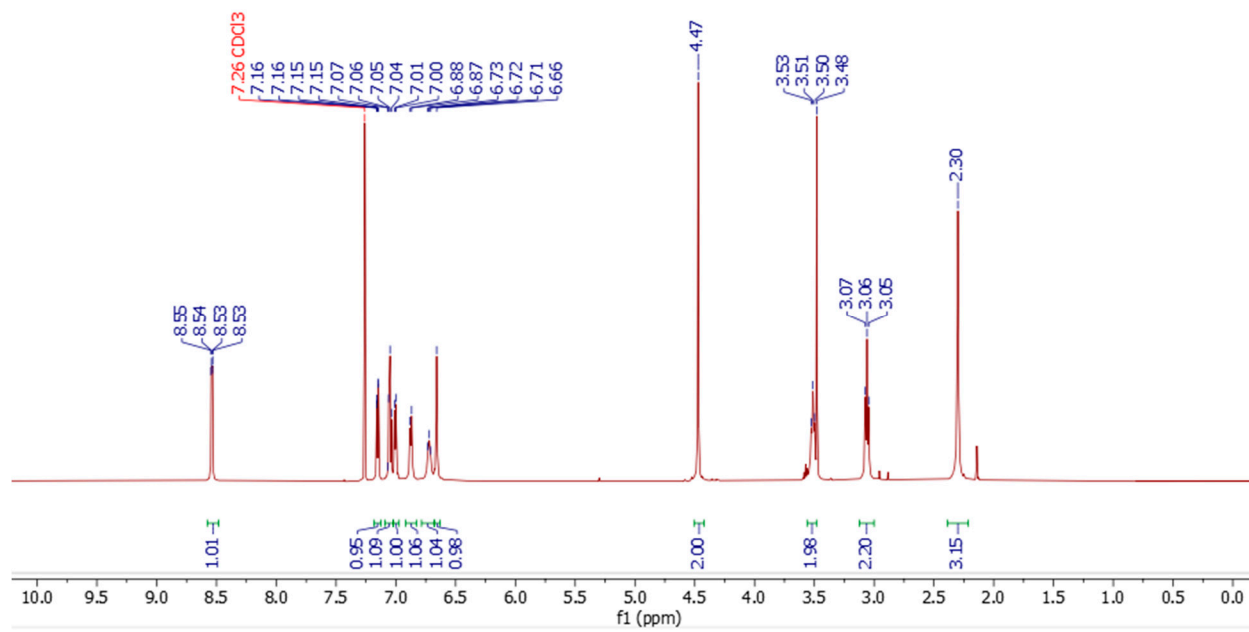



<sup>13</sup>C NMR of **50**

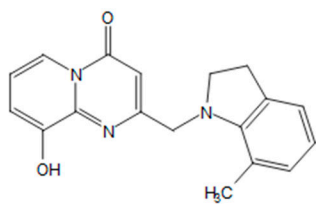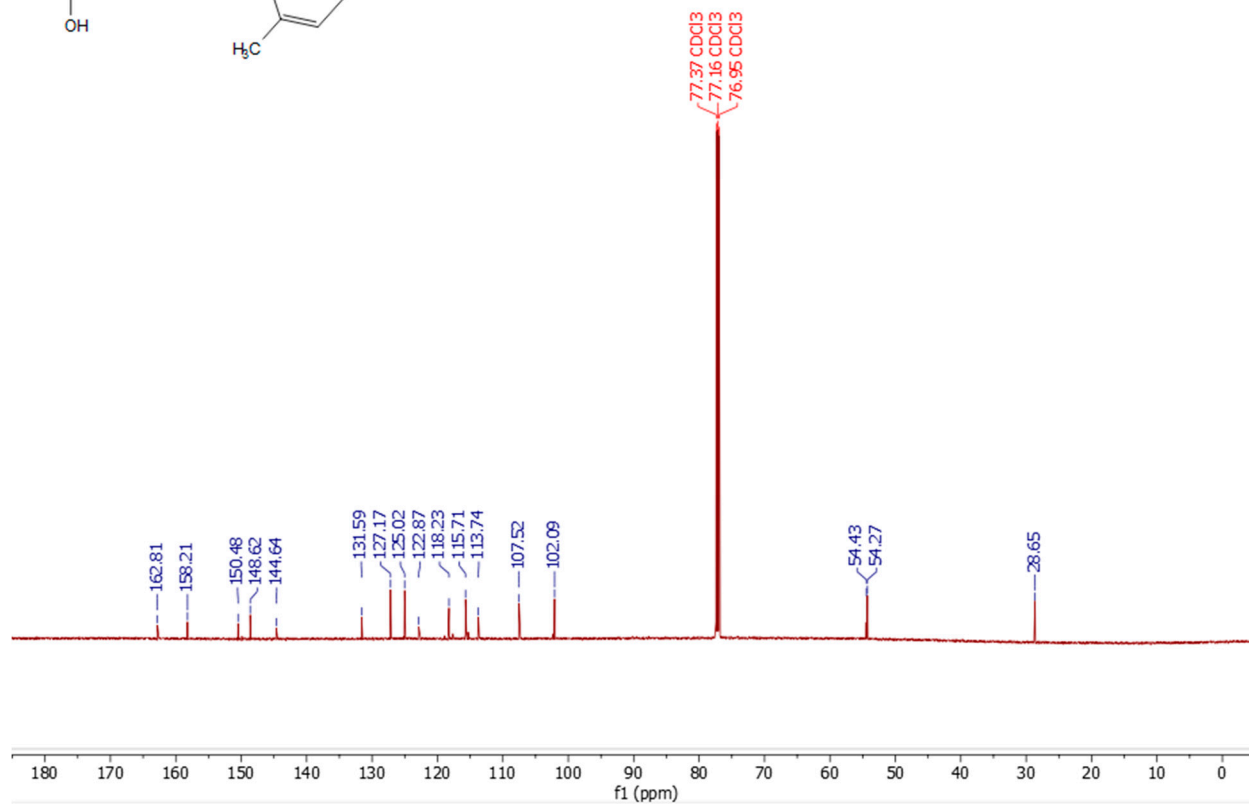

<sup>1</sup>H NMR of **51**

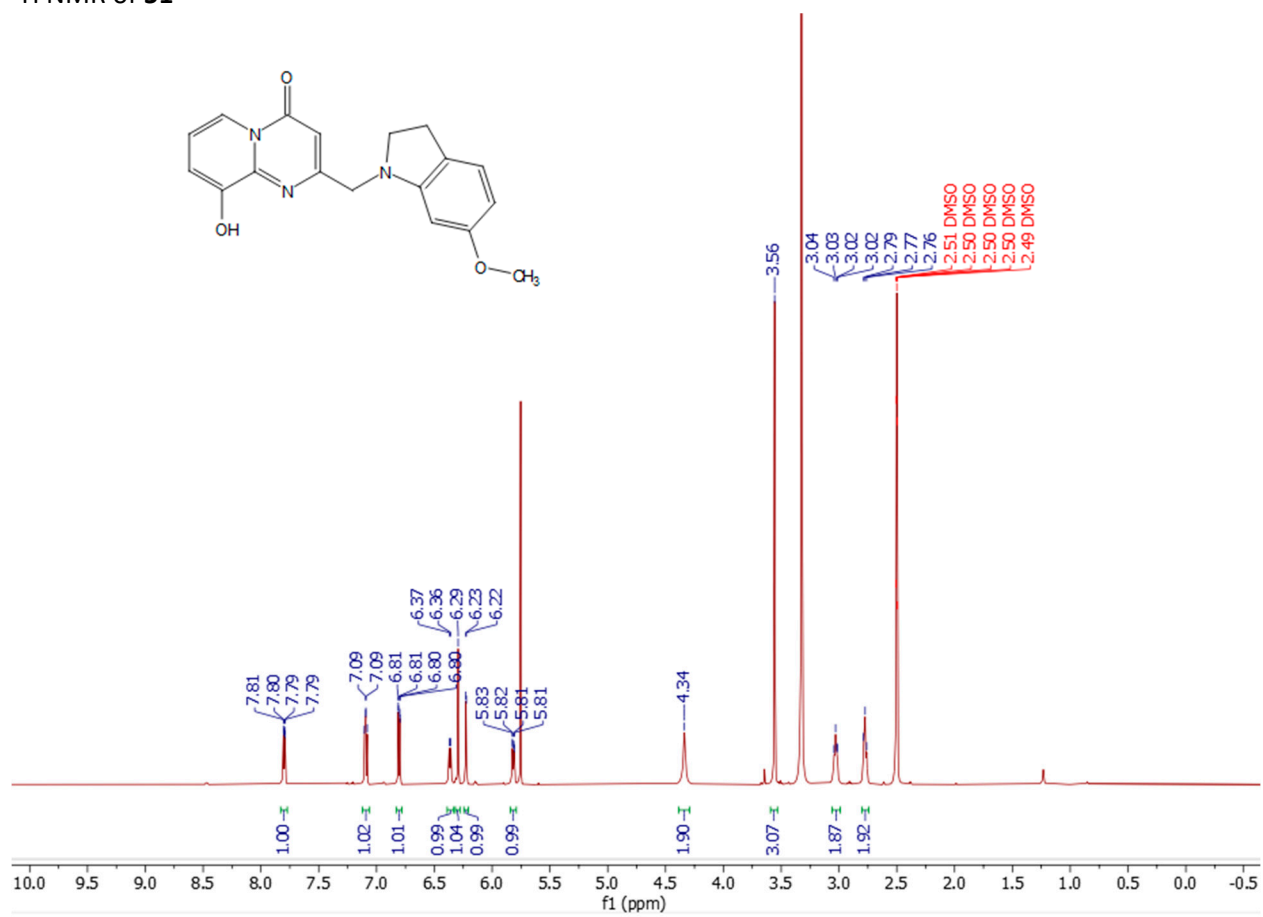

<sup>13</sup>C NMR of **51**

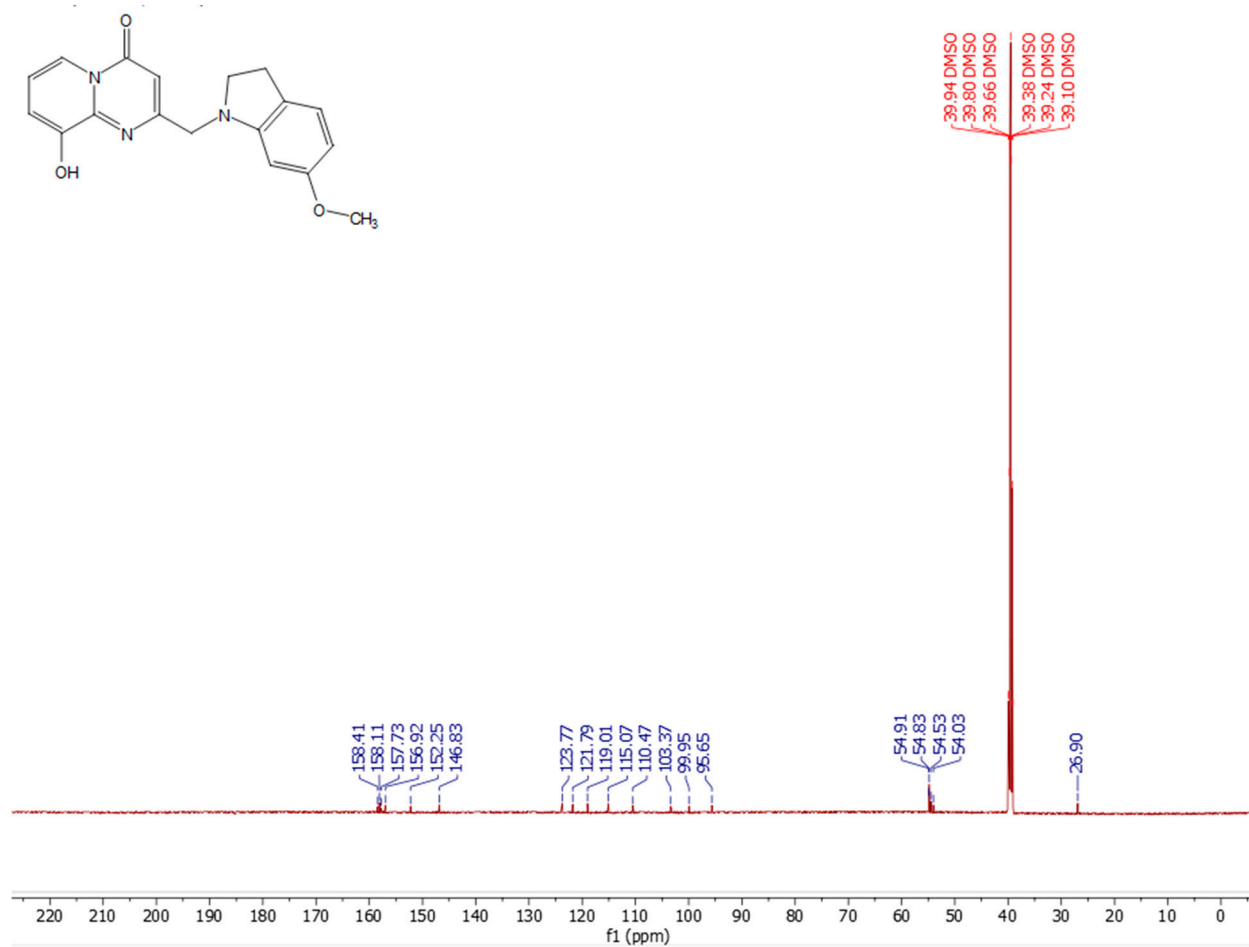

<sup>1</sup>H NMR of **52**

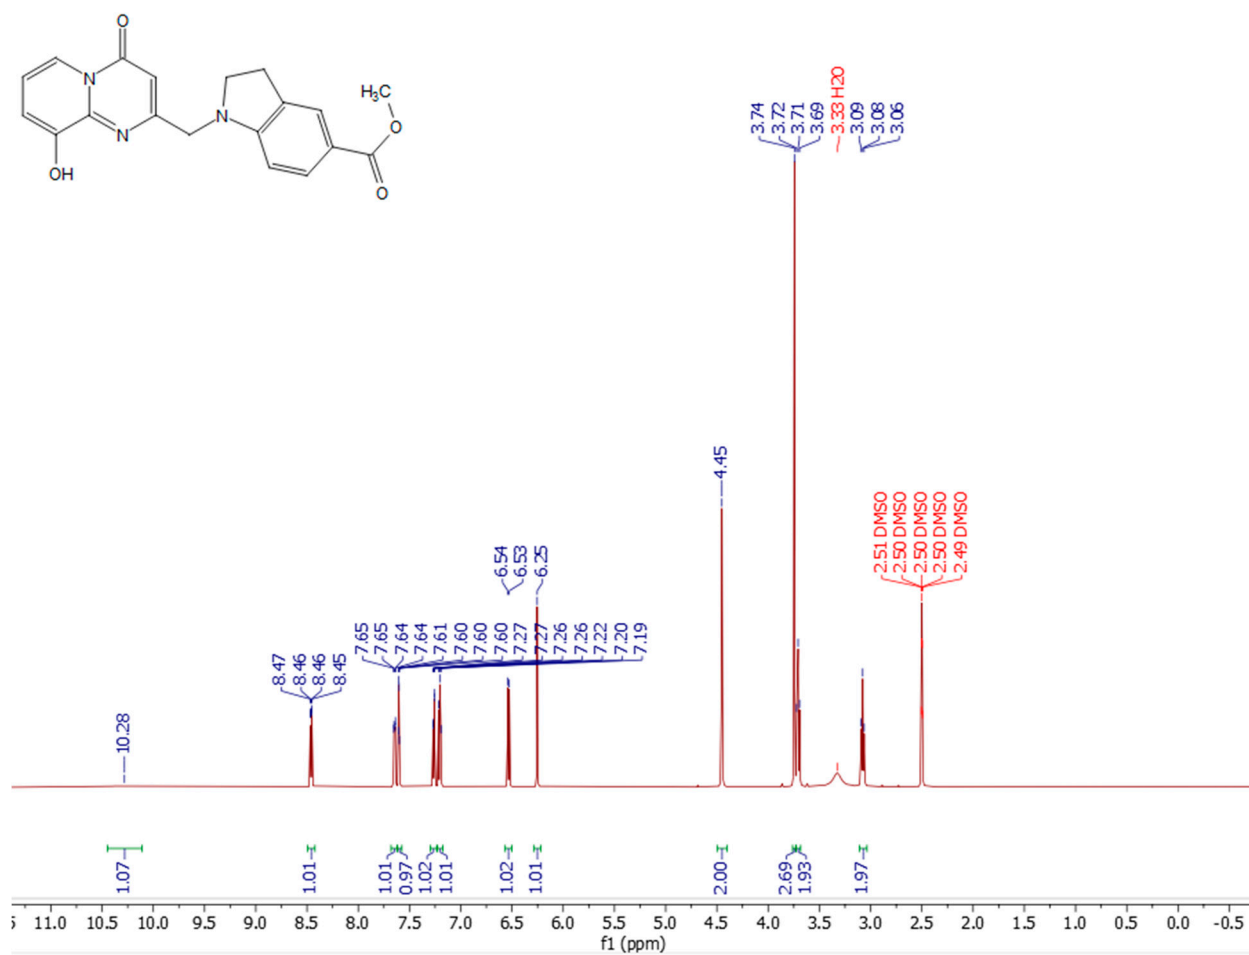

<sup>13</sup>C NMR of **52**

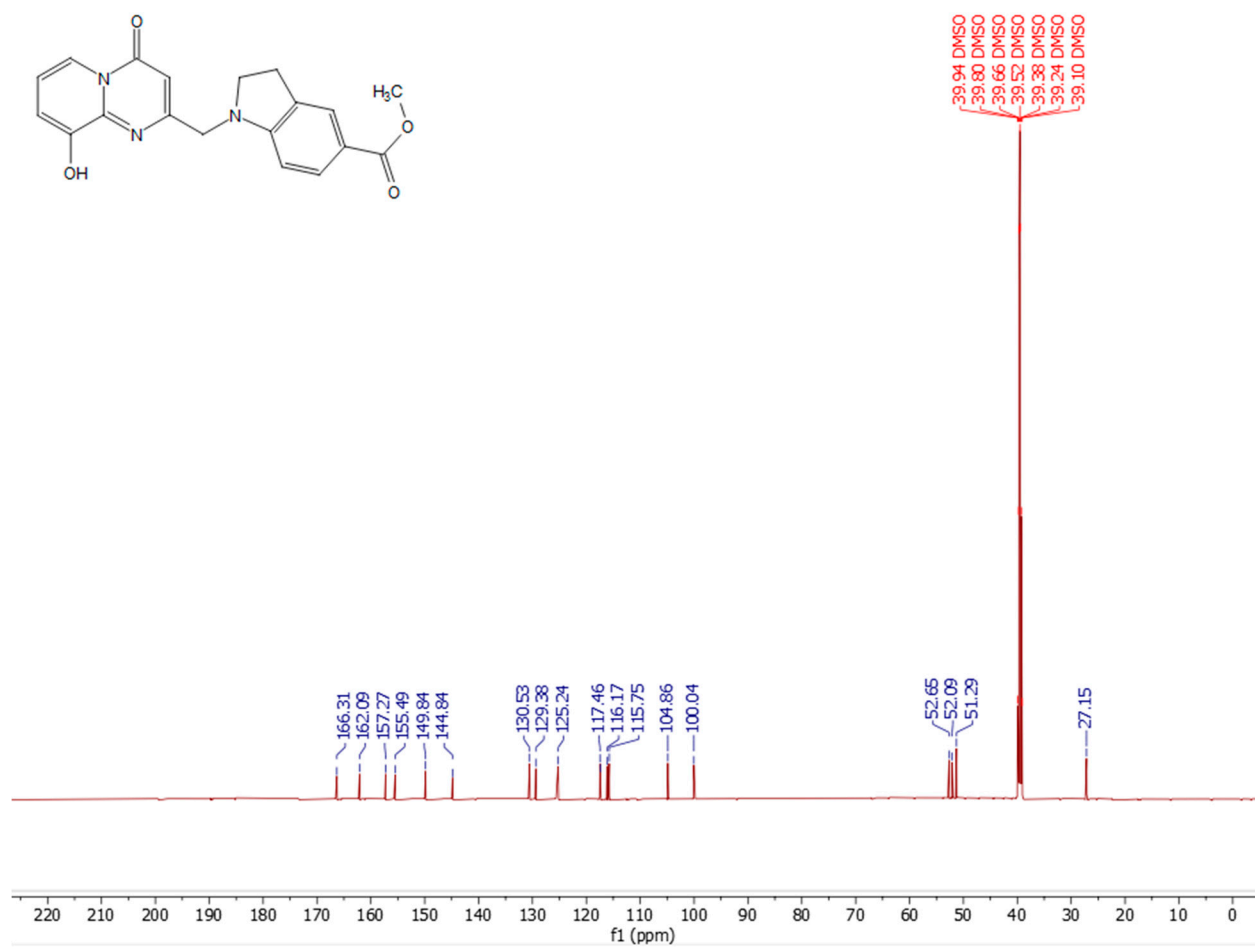

<sup>1</sup>H NMR of **53**

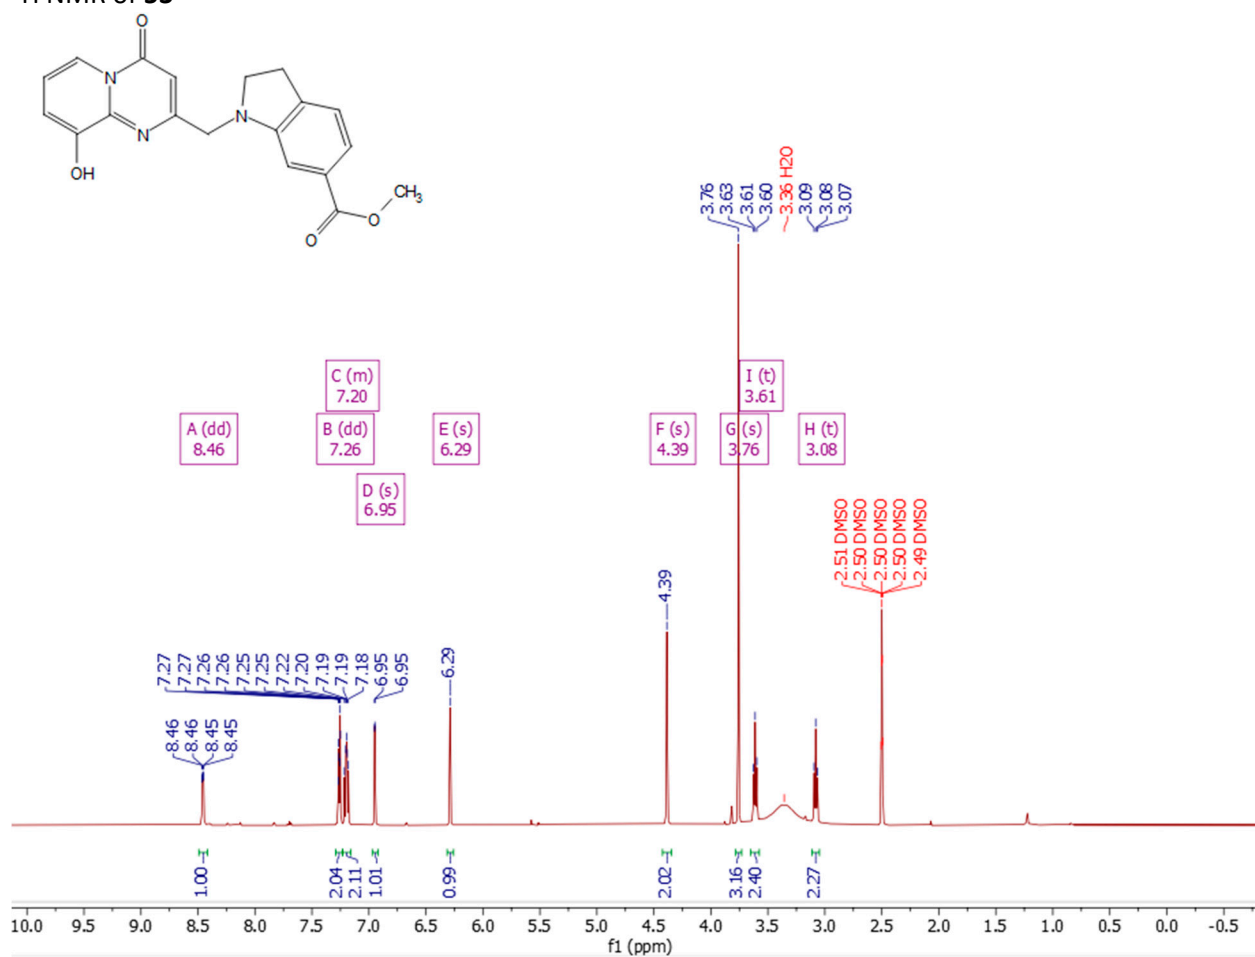

<sup>13</sup>C NMR of **53**

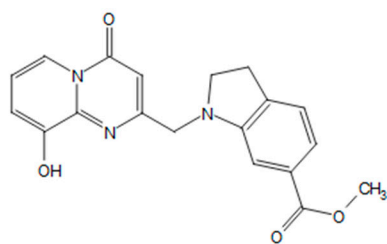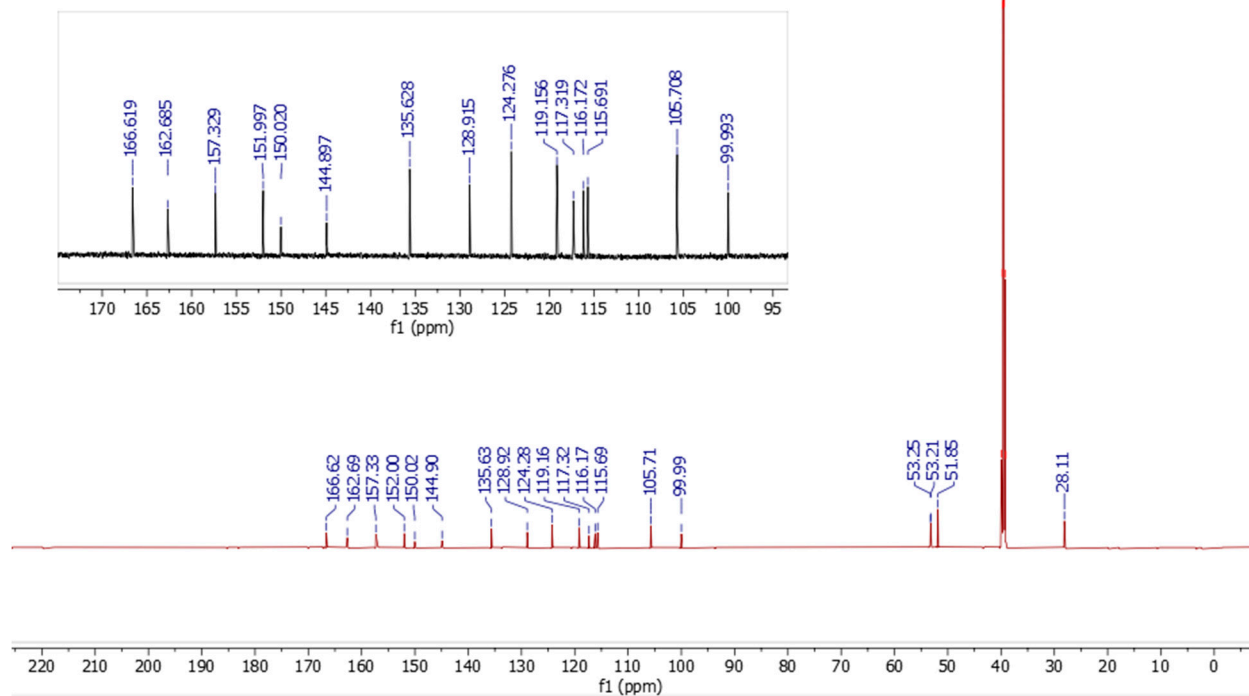

<sup>1</sup>H NMR of **54**

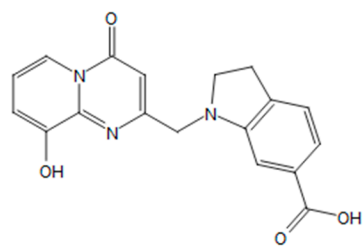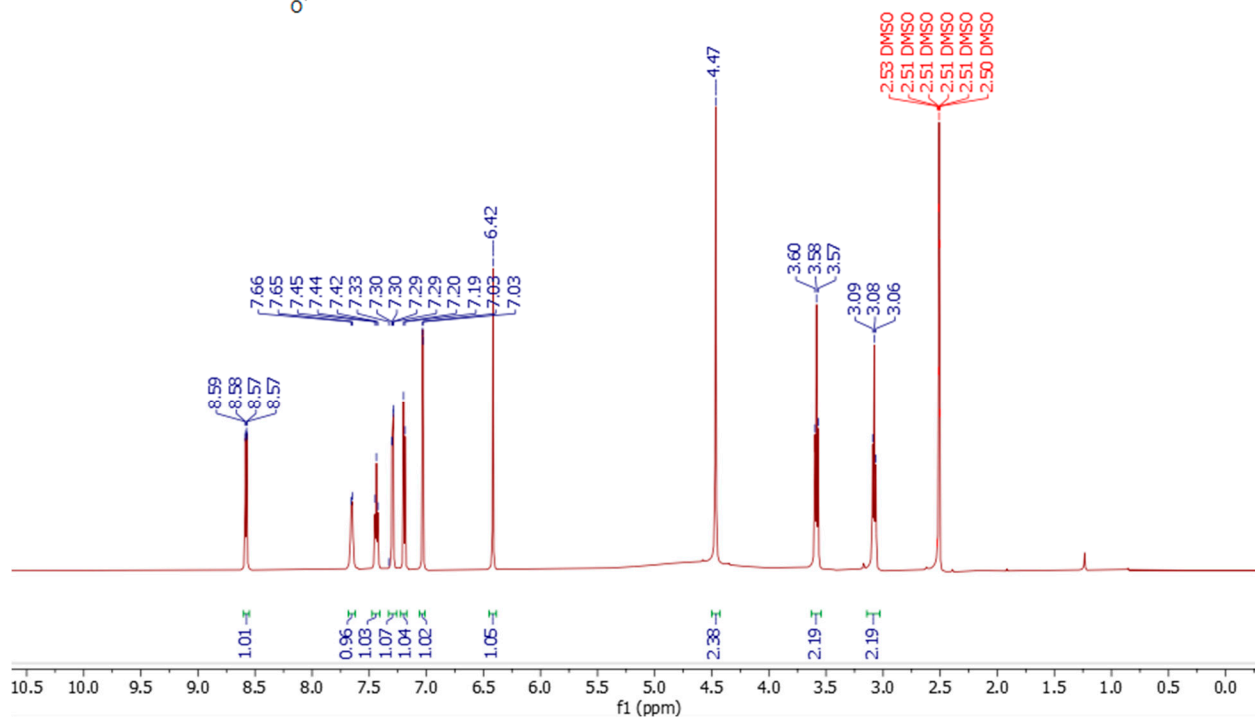



<sup>13</sup>C NMR of **54**

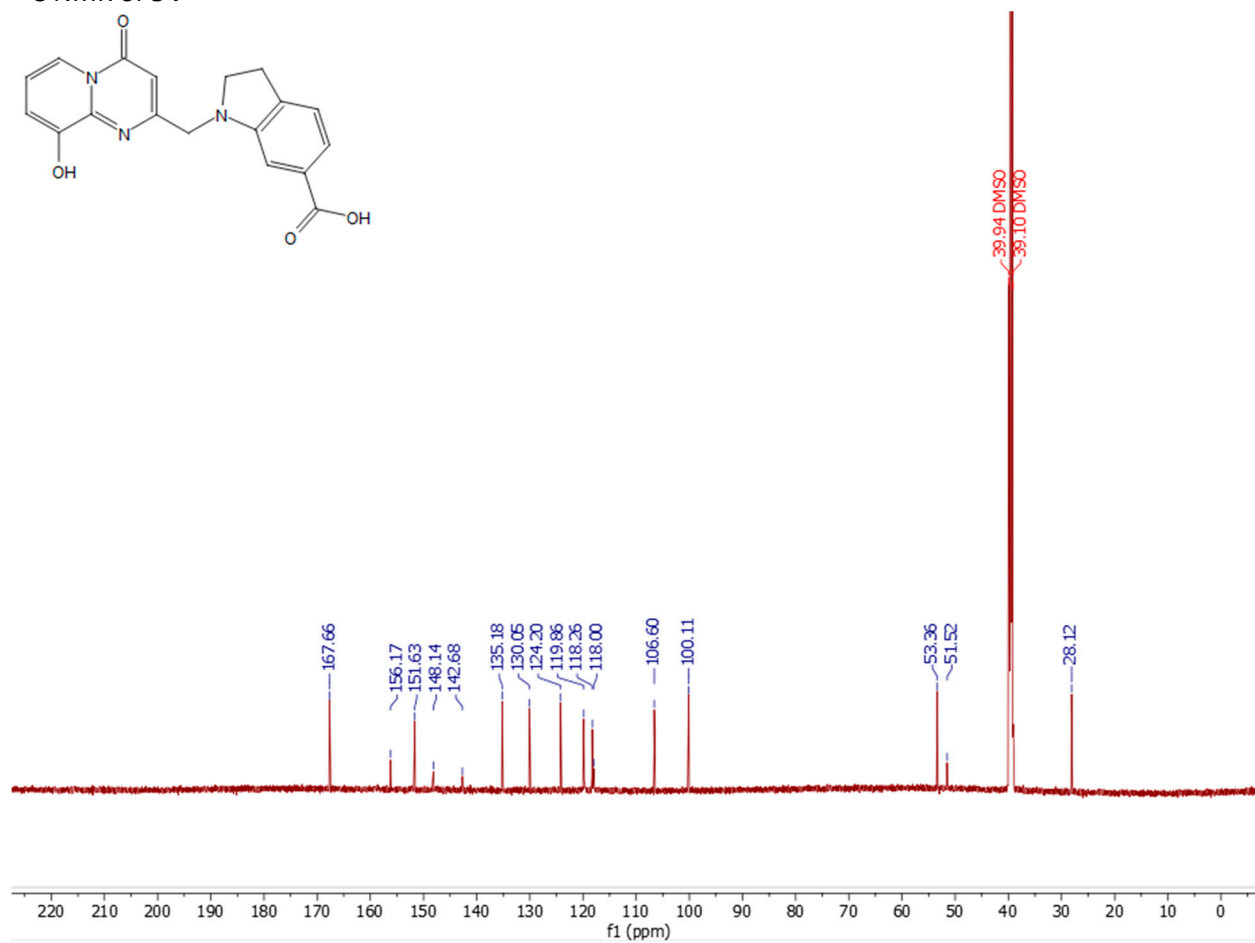

<sup>1</sup>H NMR of **55**

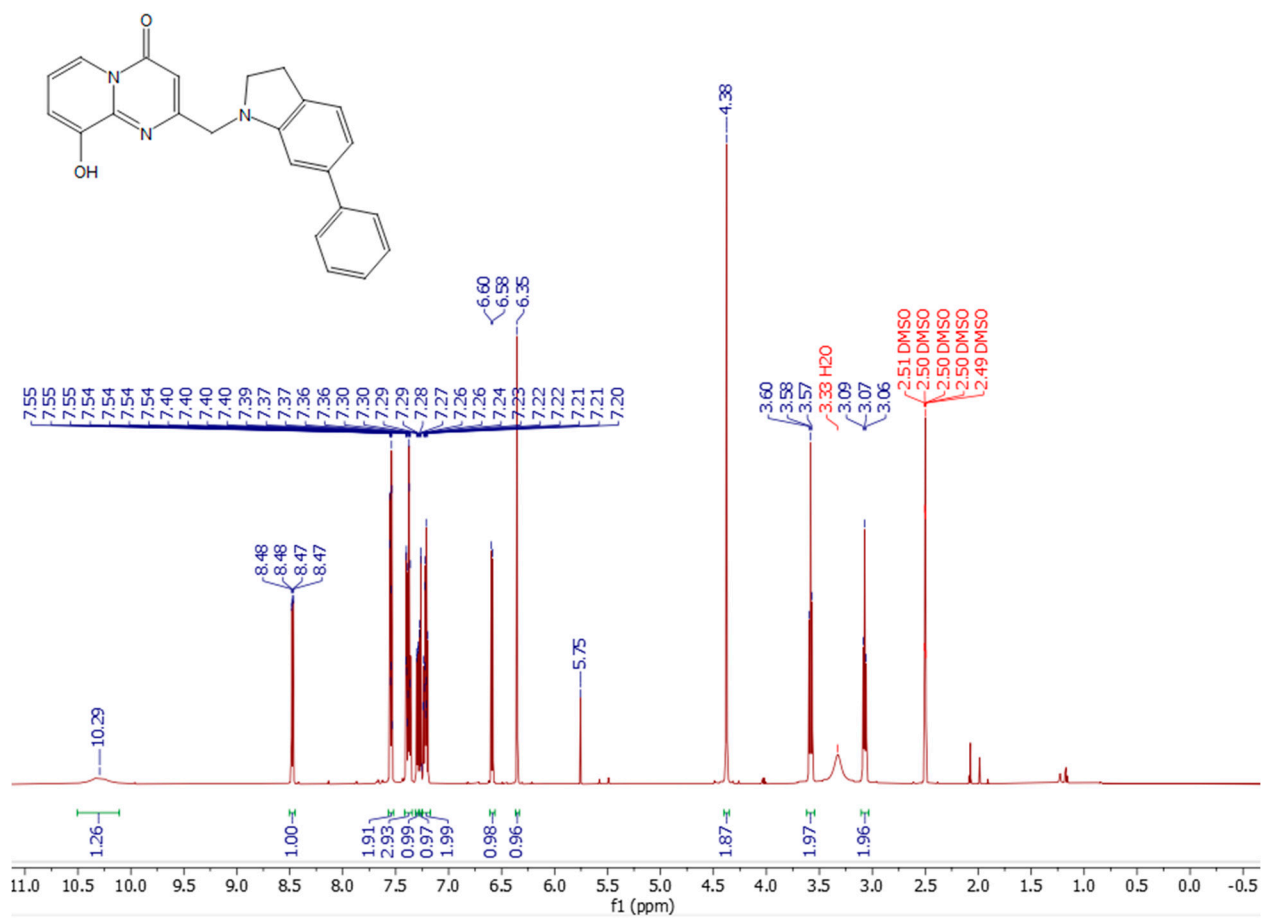

<sup>13</sup>C NMR of **55**

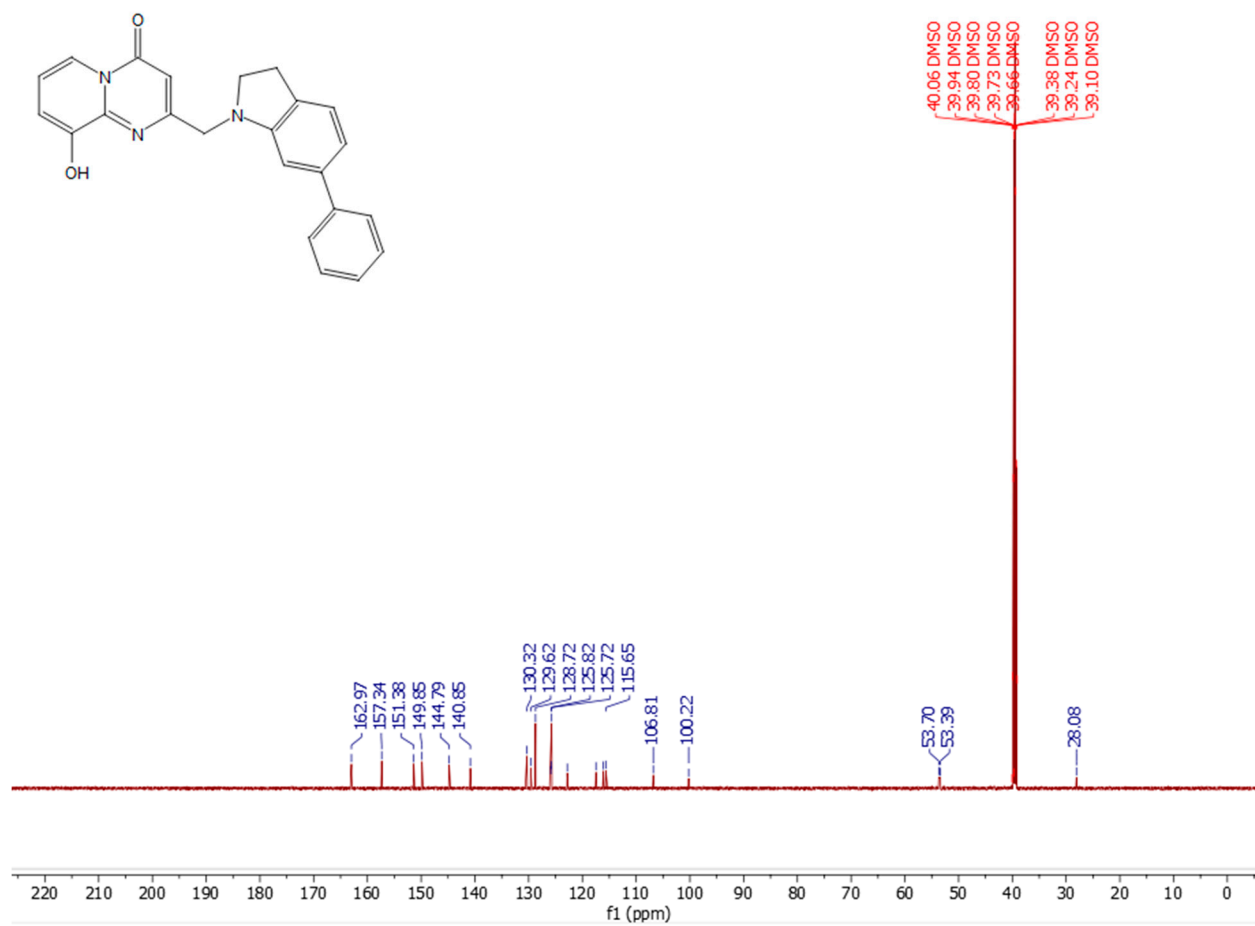

<sup>1</sup>H NMR of 56

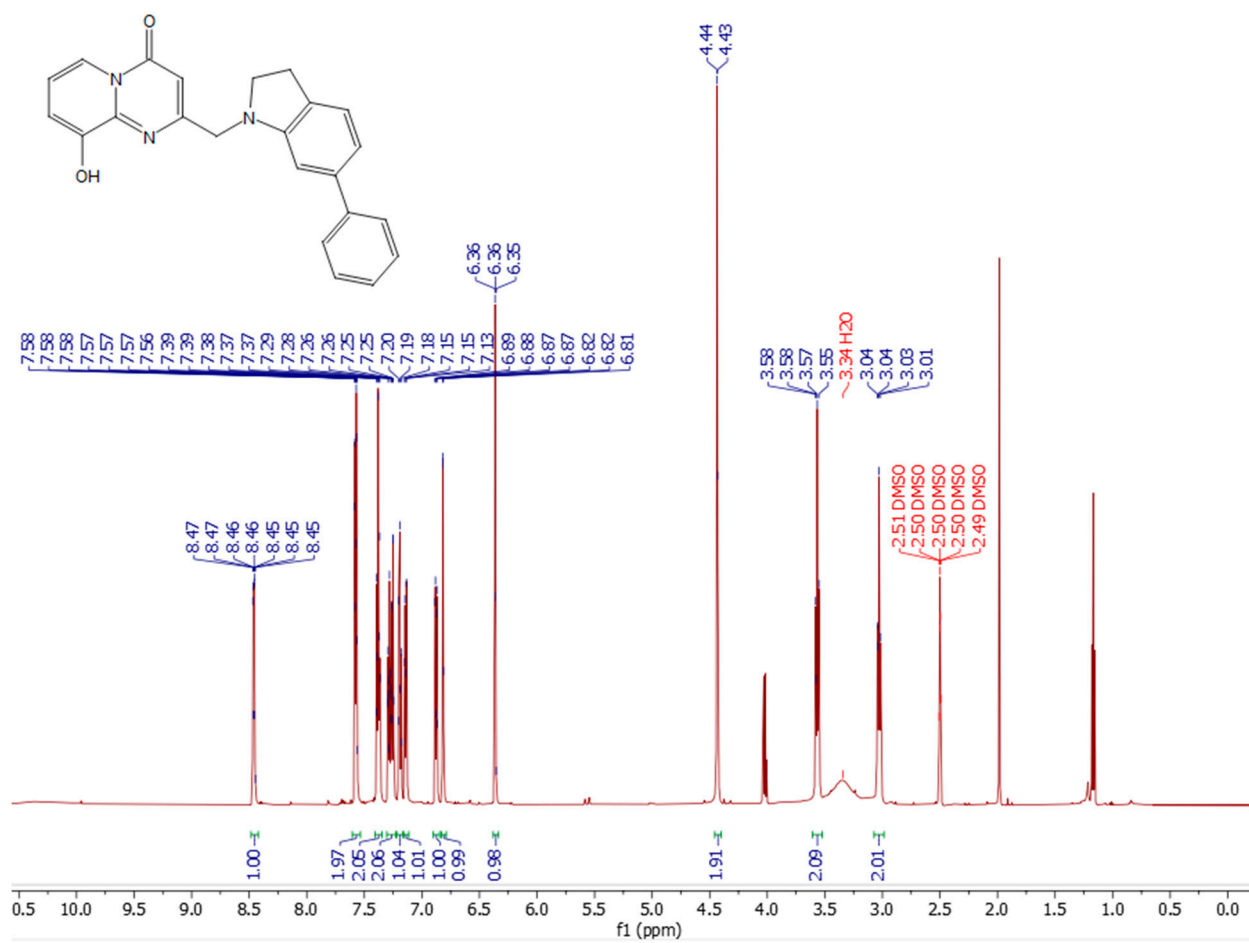

<sup>13</sup>C NMR of **56**

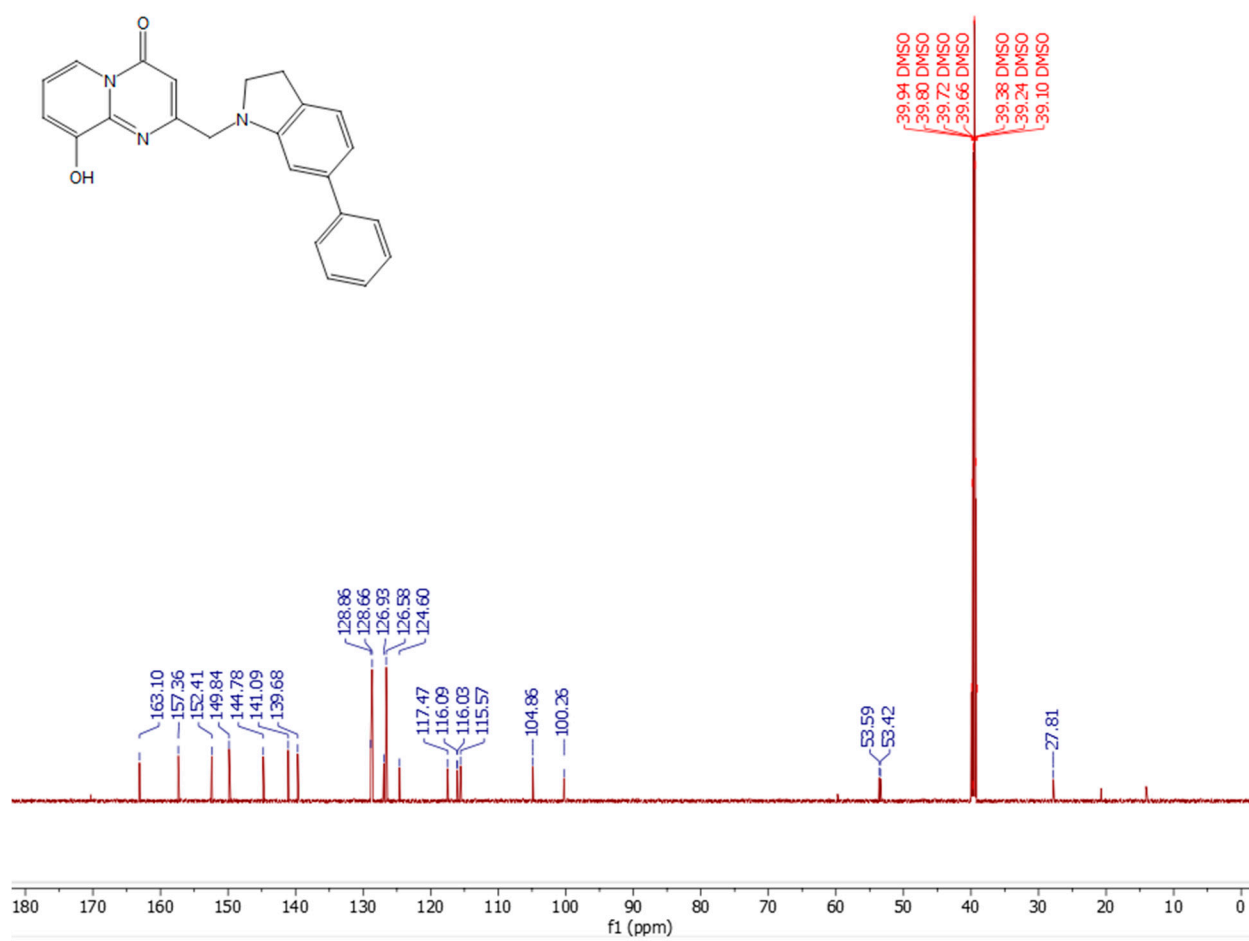

<sup>1</sup>H NMR of **57**

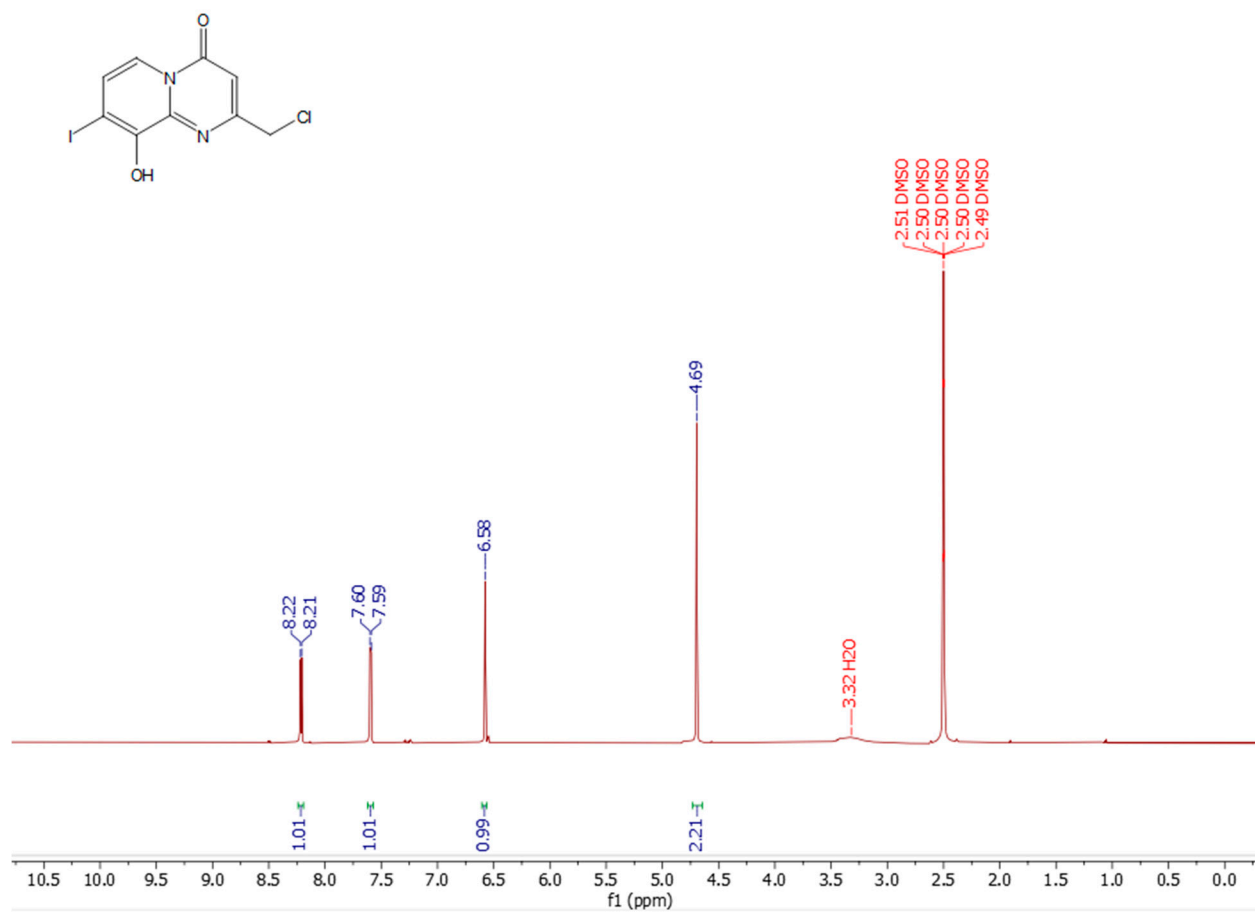

<sup>13</sup>C NMR of **57**

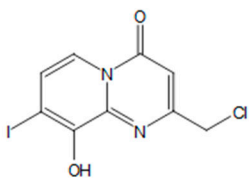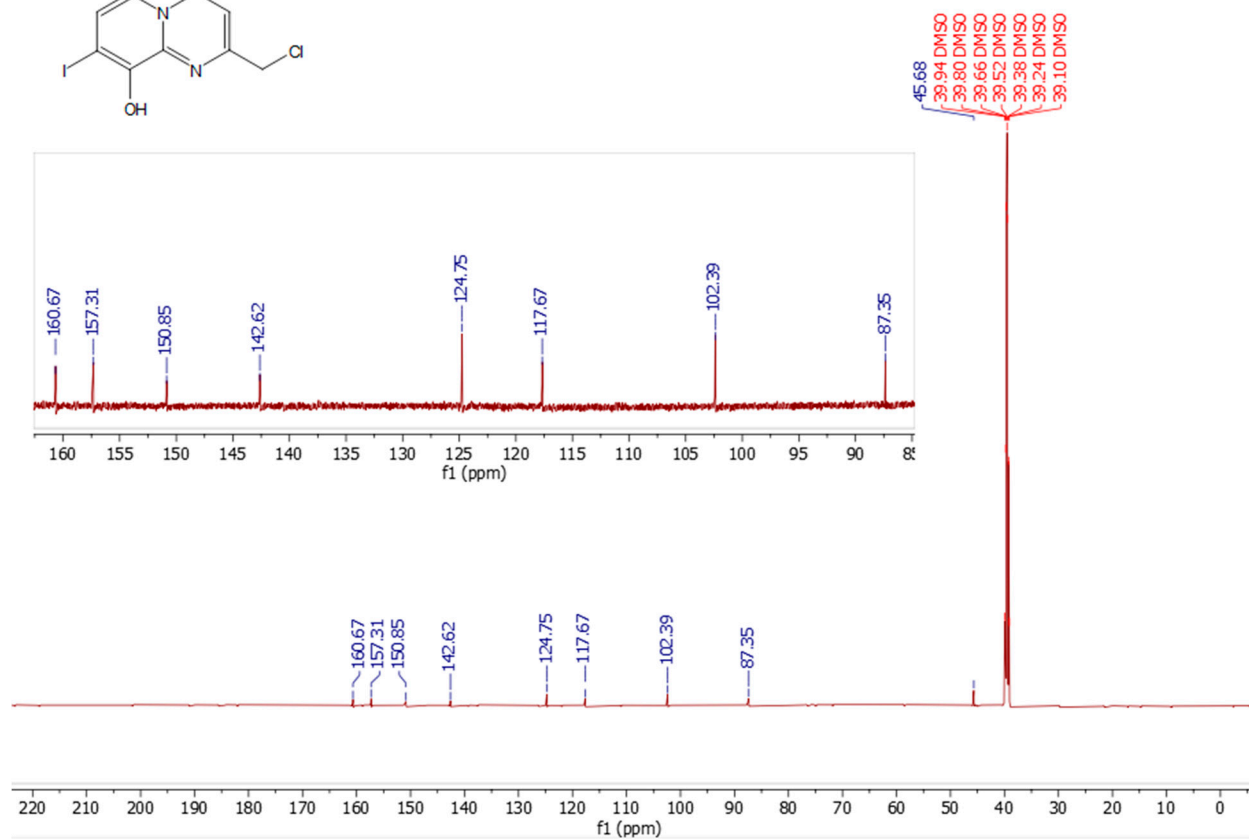

<sup>1</sup>H NMR of **58**

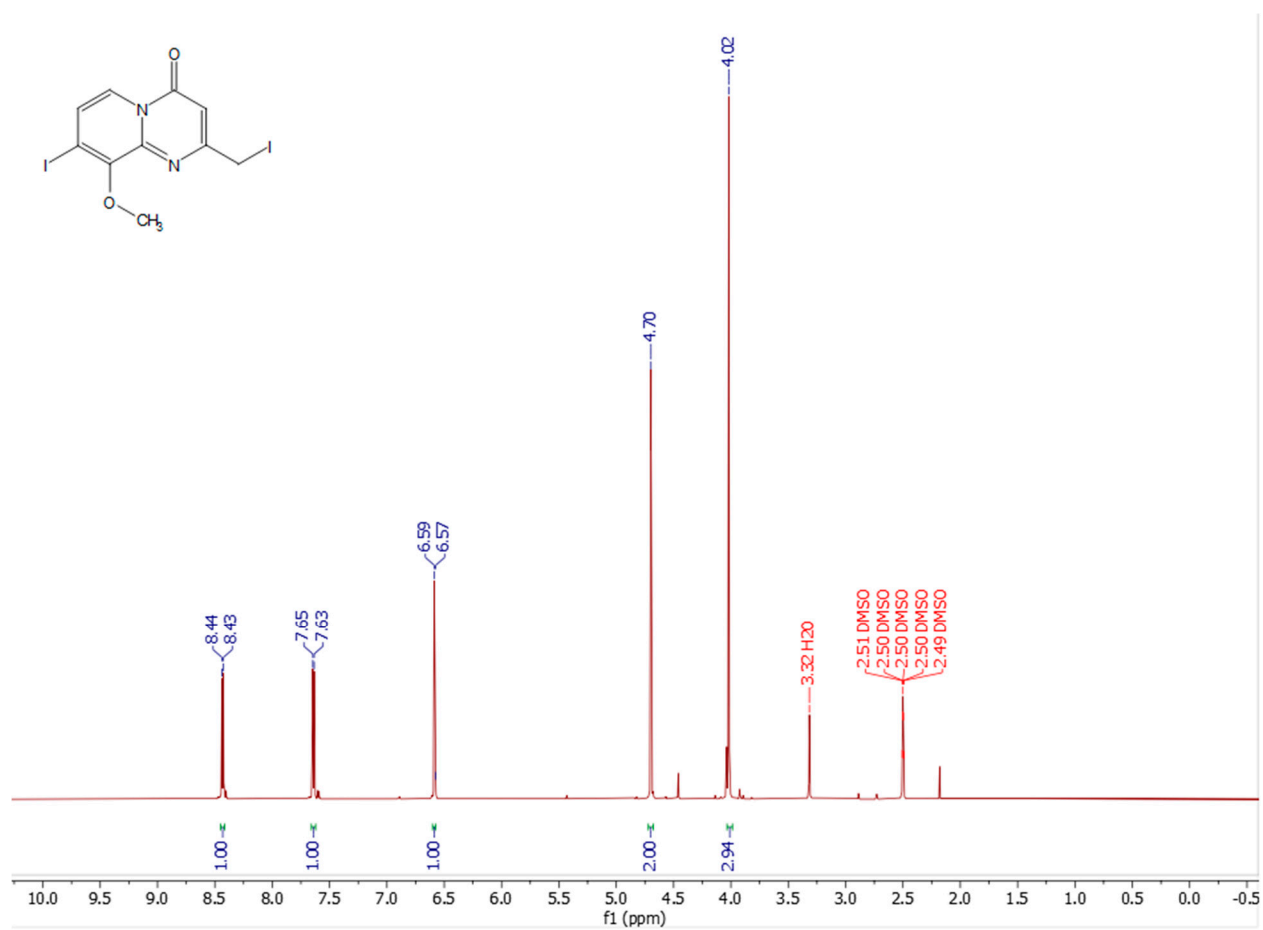



<sup>13</sup>C NMR of **58**

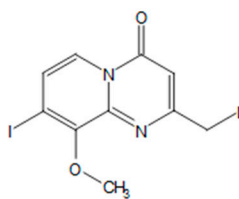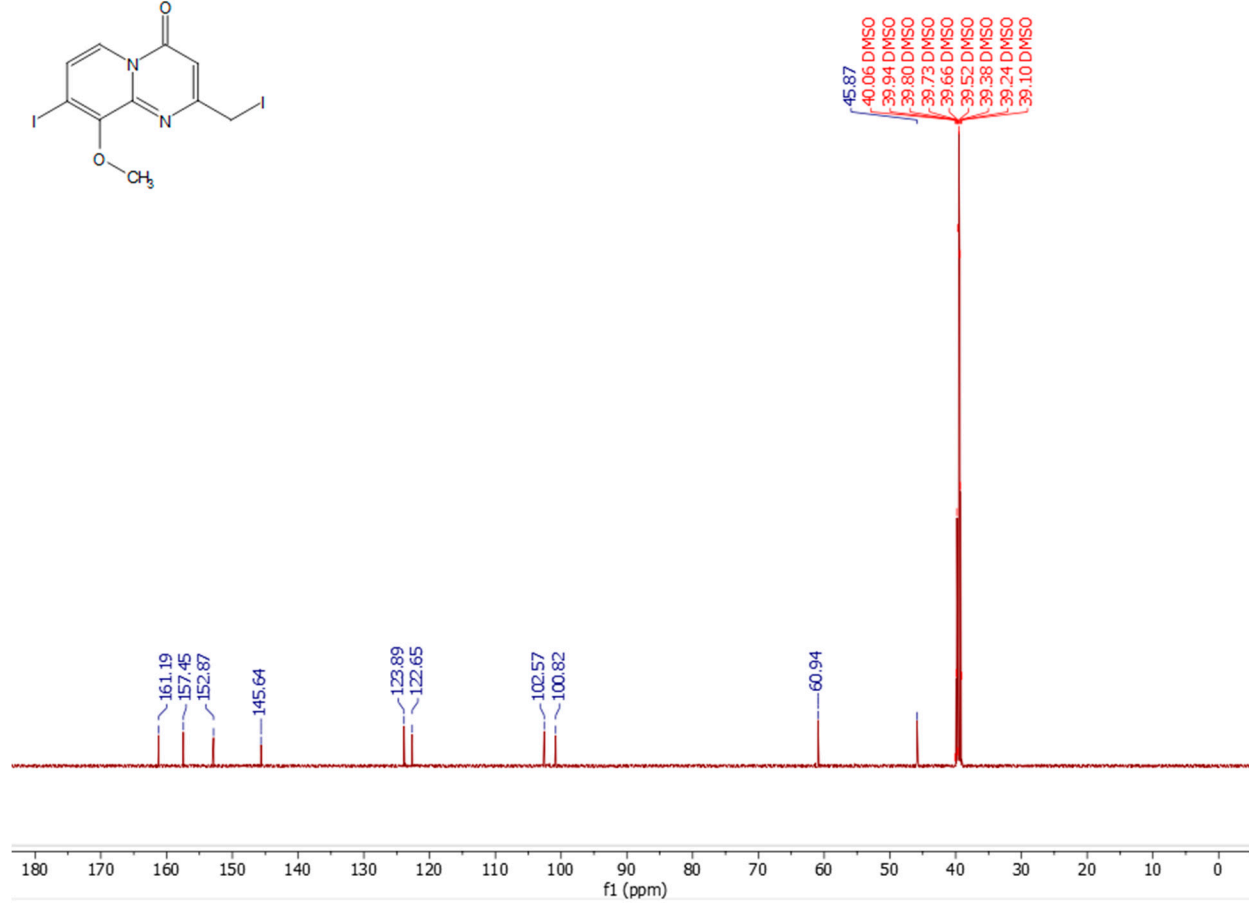

<sup>1</sup>H NMR of **59**

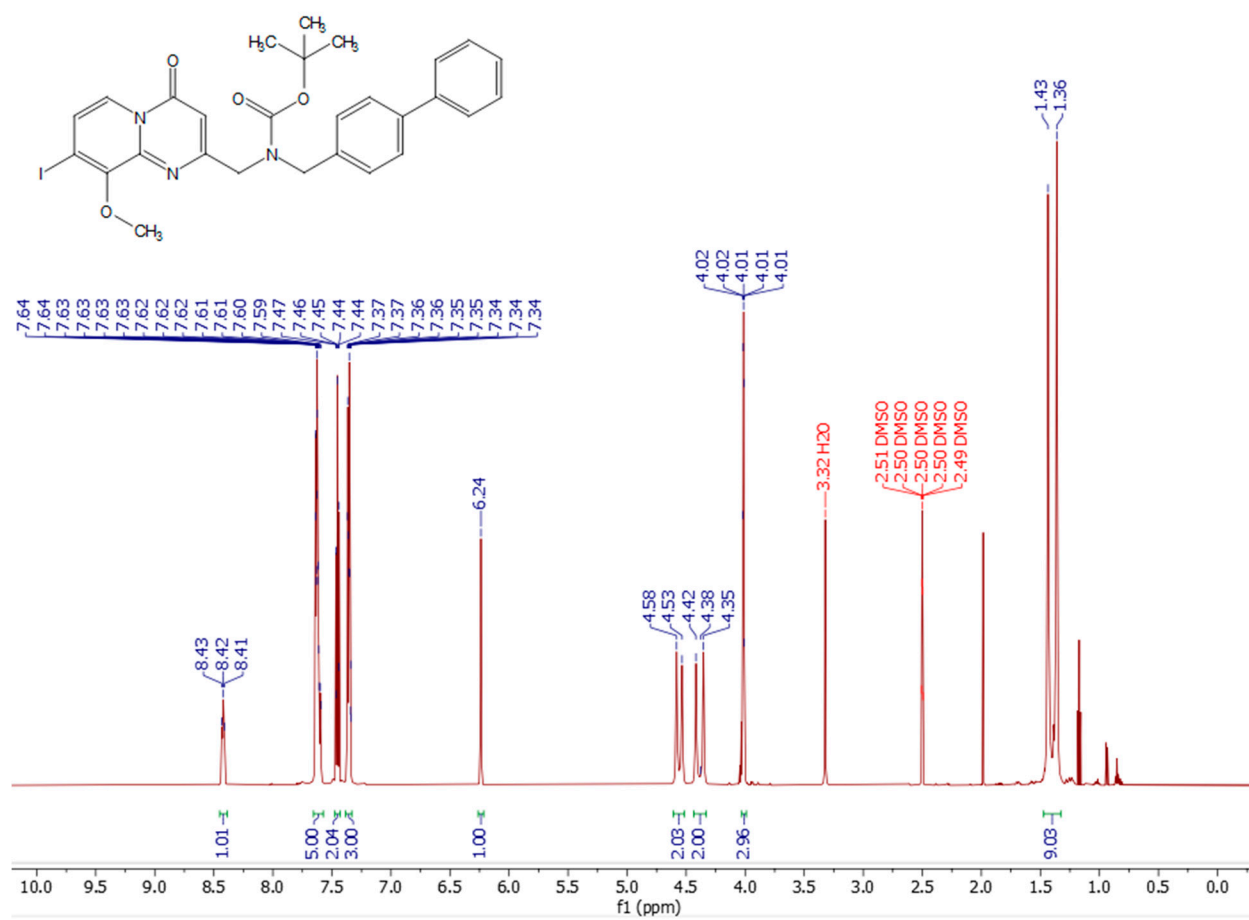

<sup>13</sup>C NMR of **59**

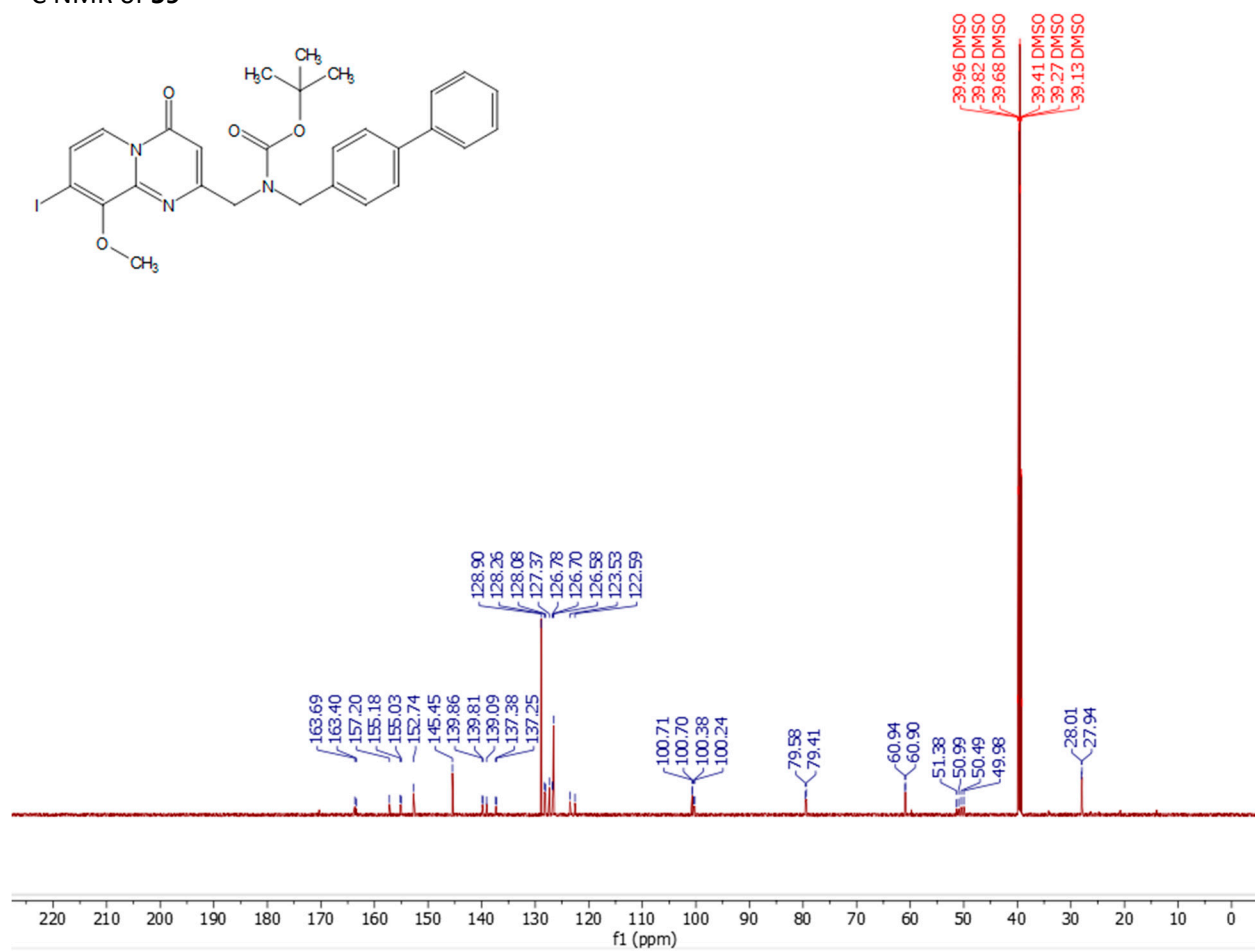

<sup>1</sup>H NMR of **60**

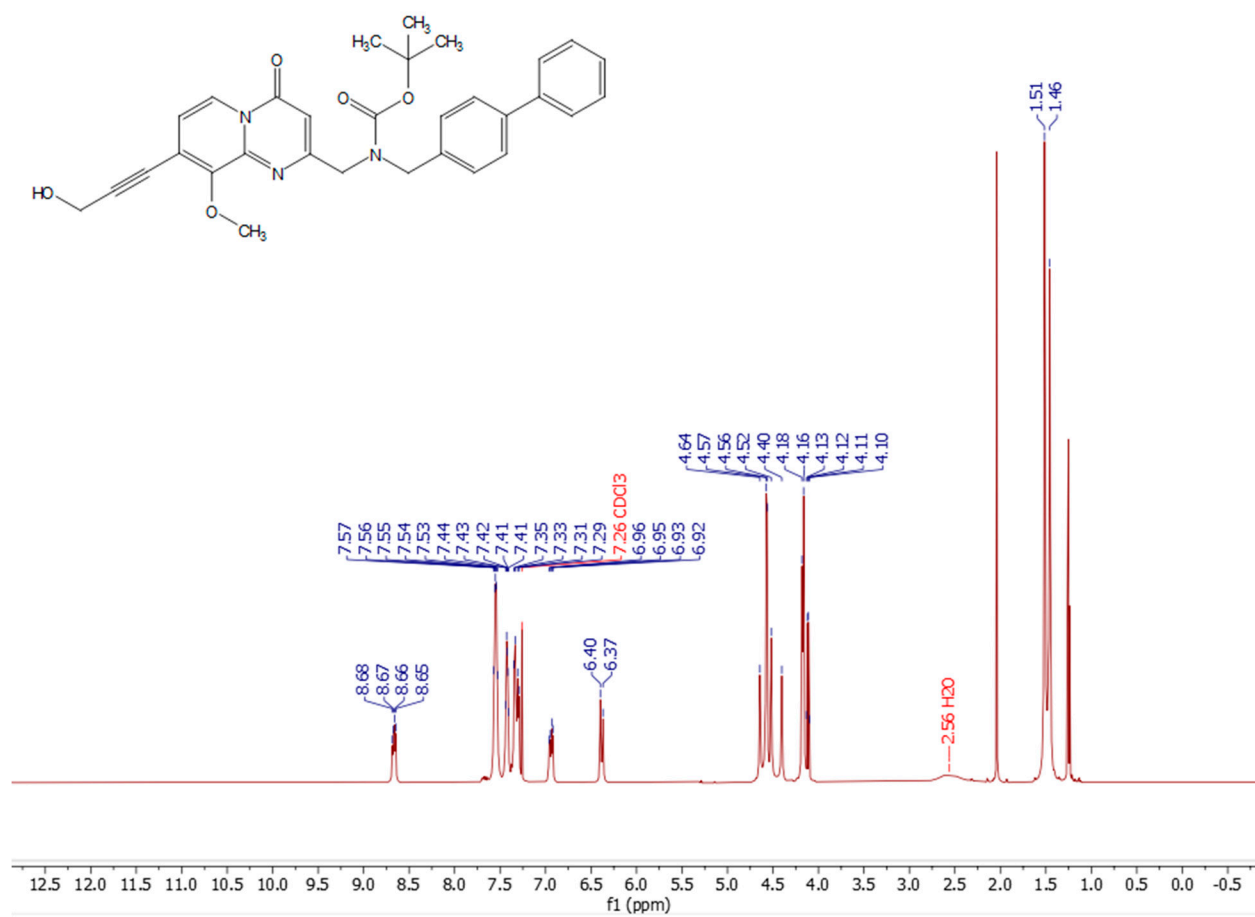

<sup>13</sup>C NMR of **60**

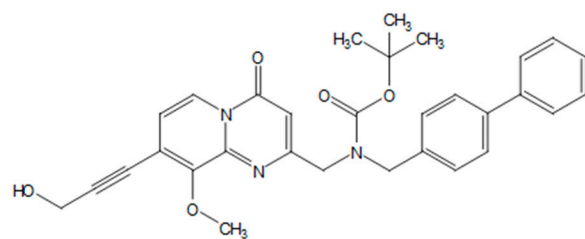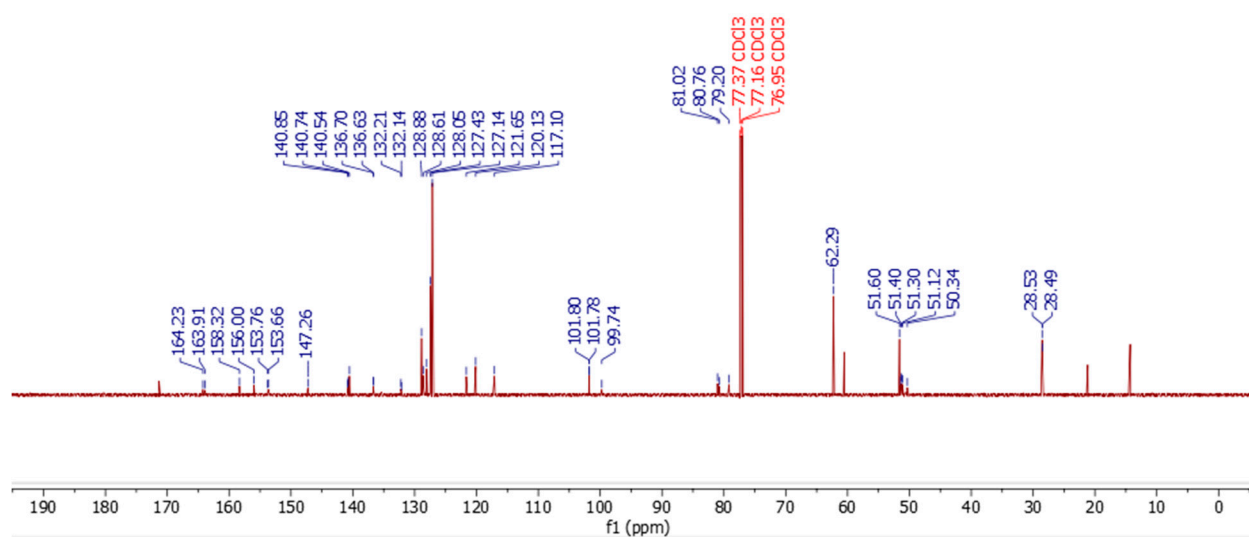

<sup>1</sup>H NMR of **61**

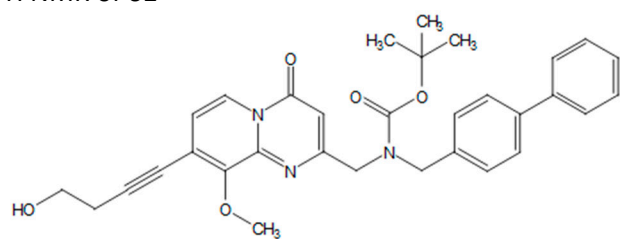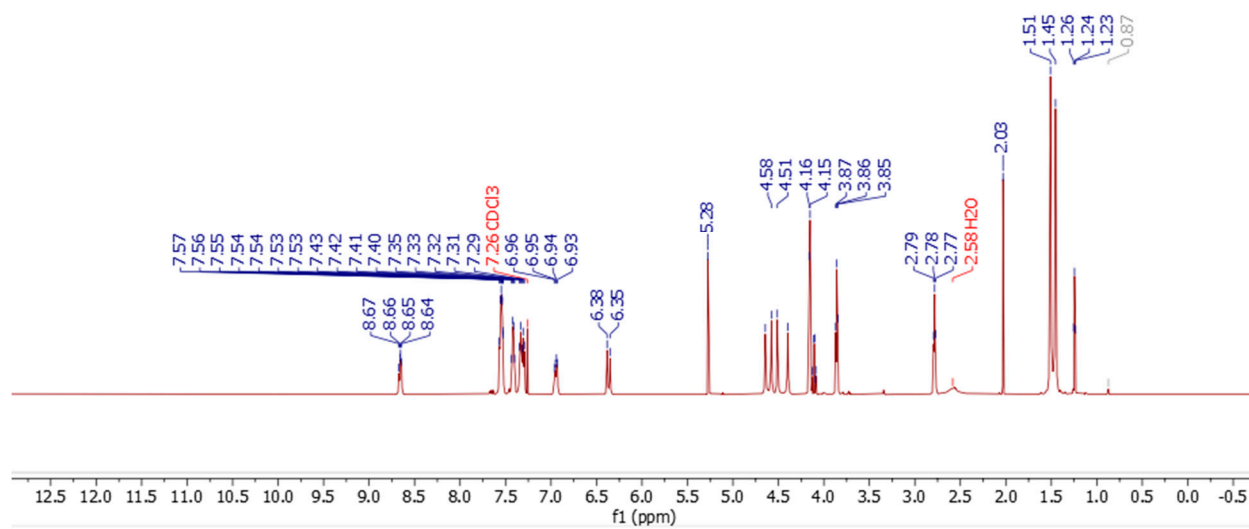

<sup>13</sup>C NMR of **61**

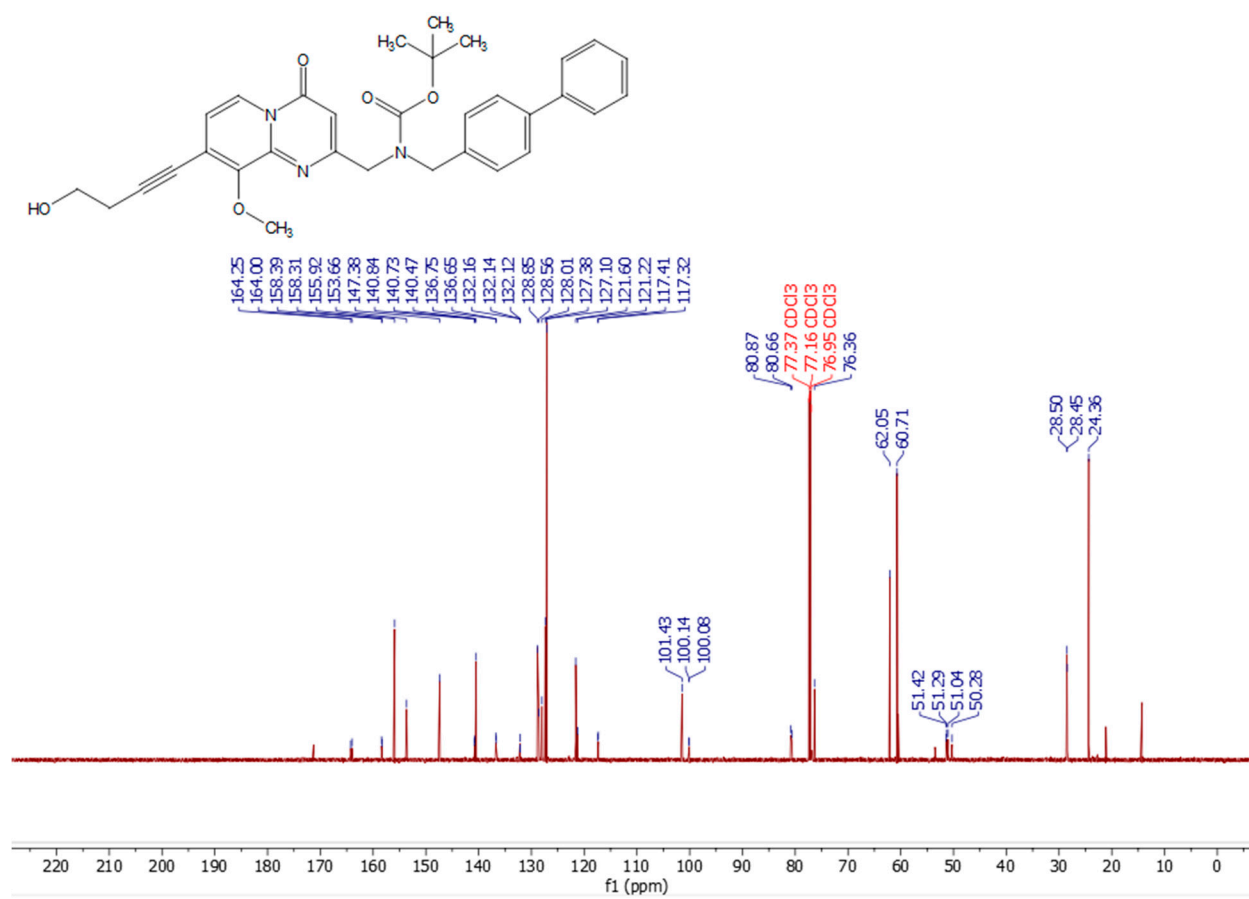

<sup>1</sup>H NMR of **62**

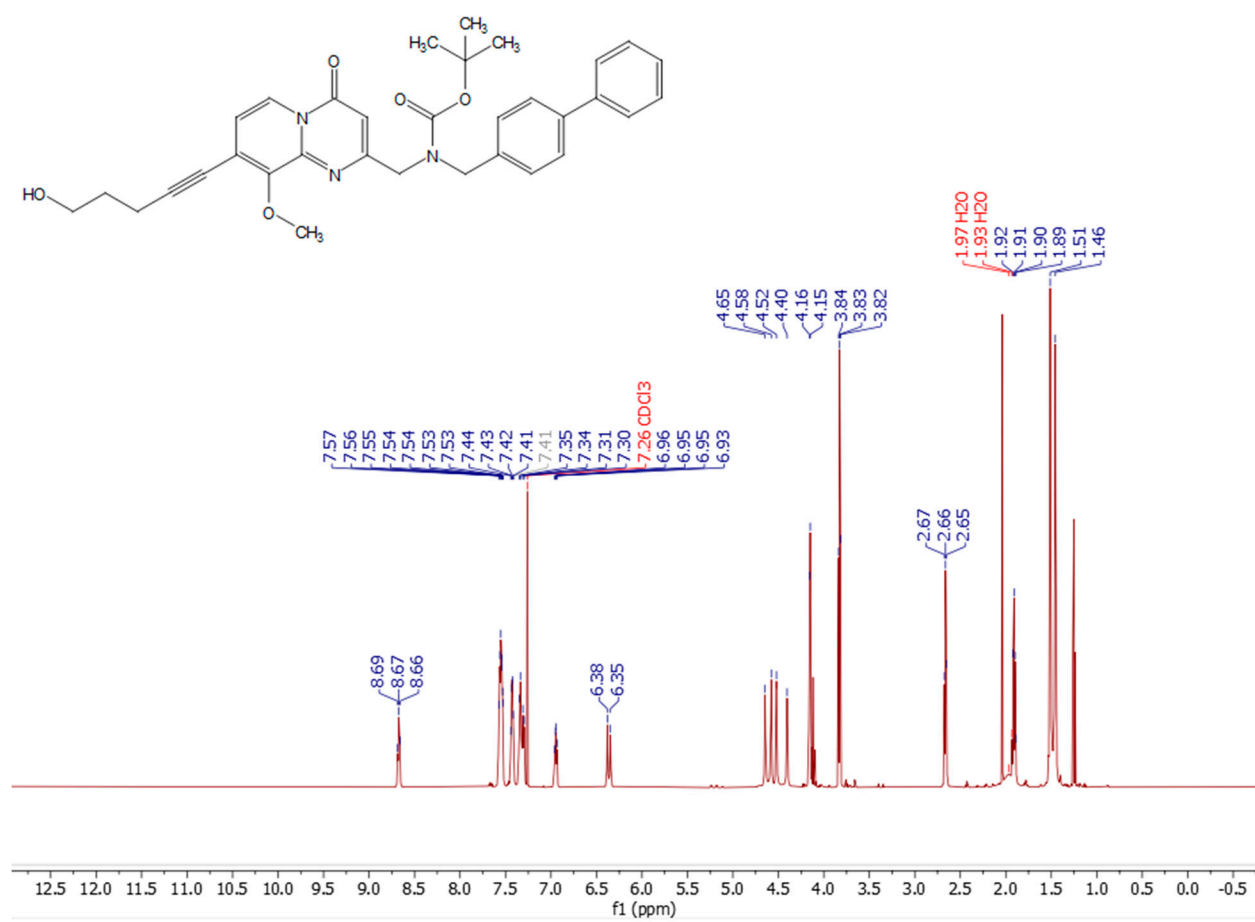



<sup>13</sup>C NMR of **62**

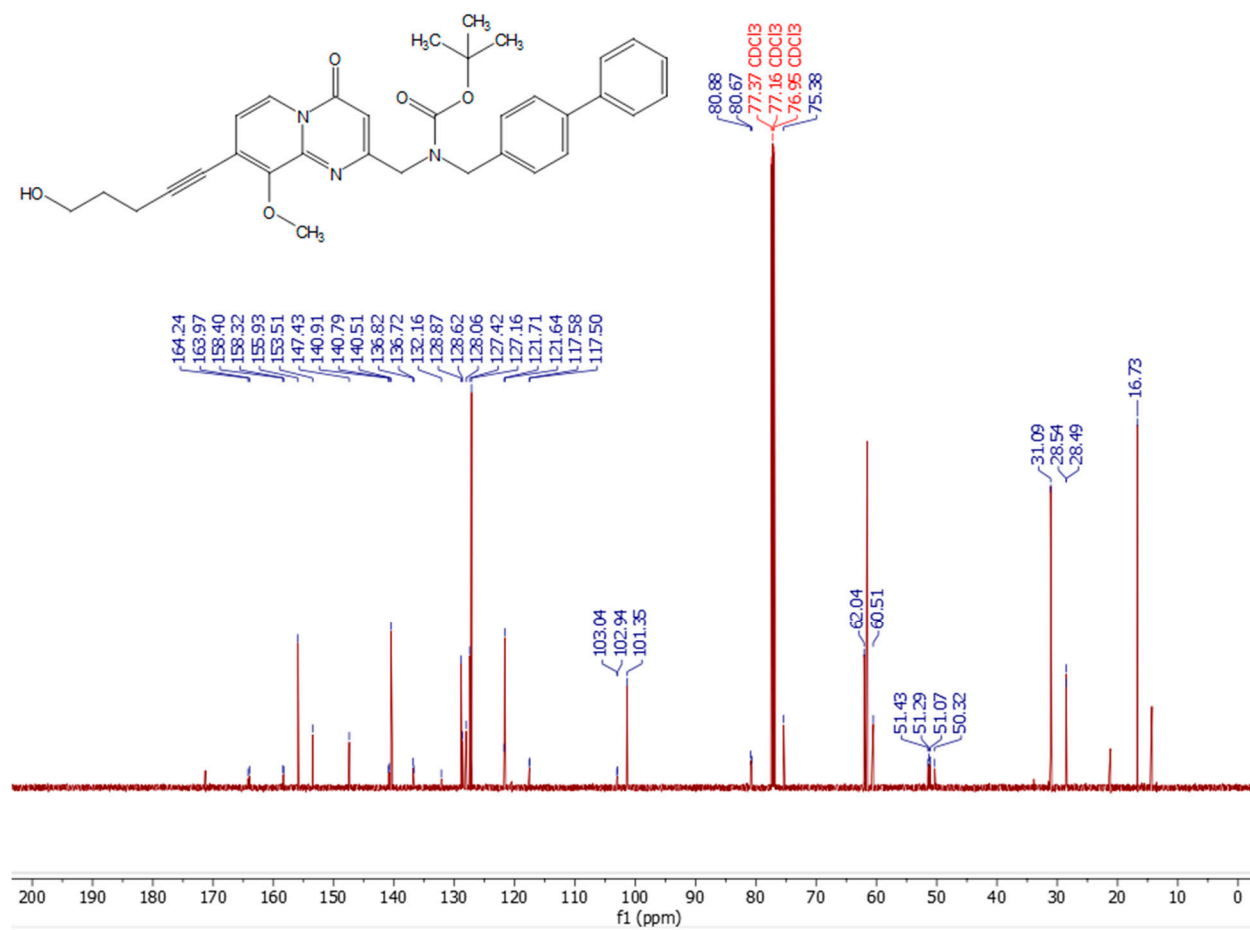

<sup>1</sup>H NMR of **63**

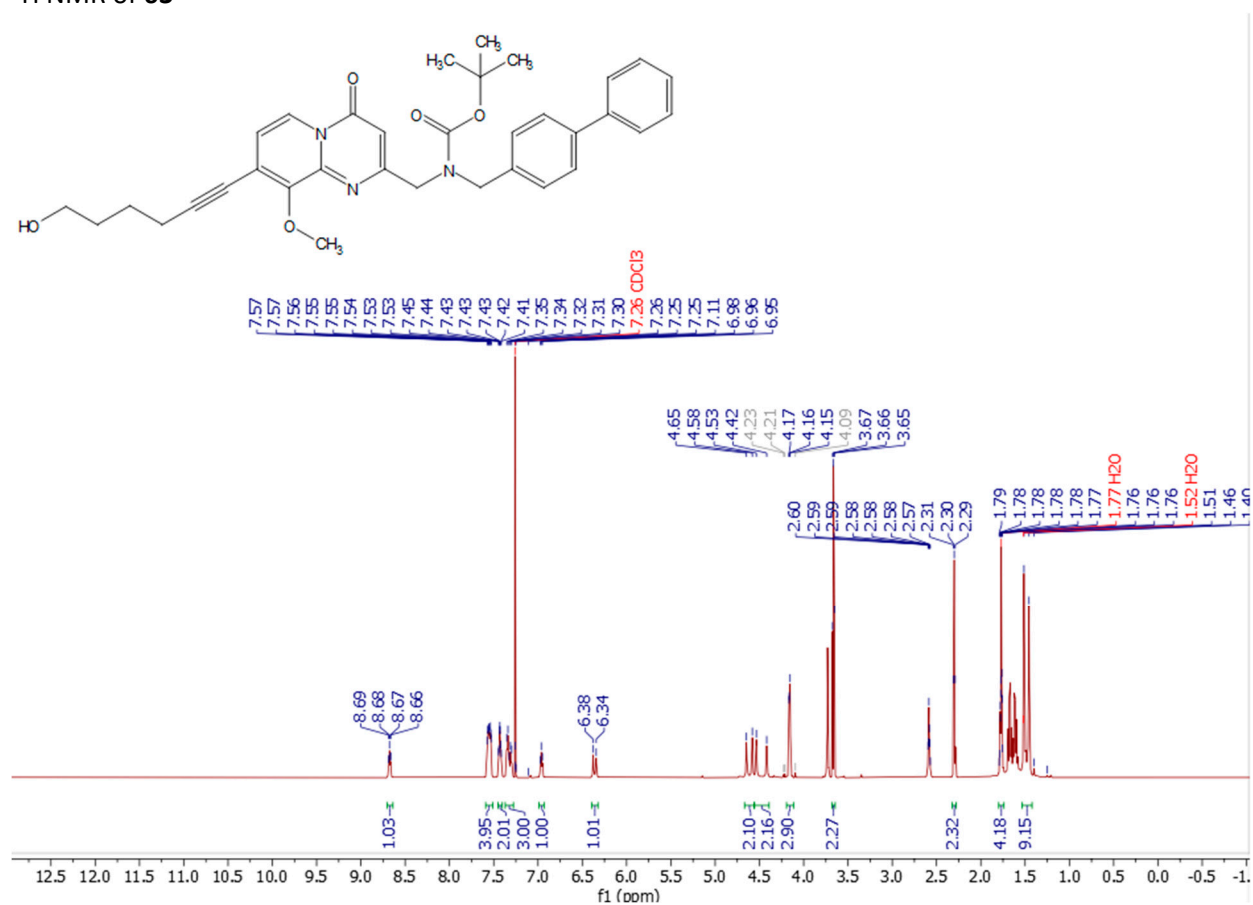

<sup>13</sup>C NMR of **63**

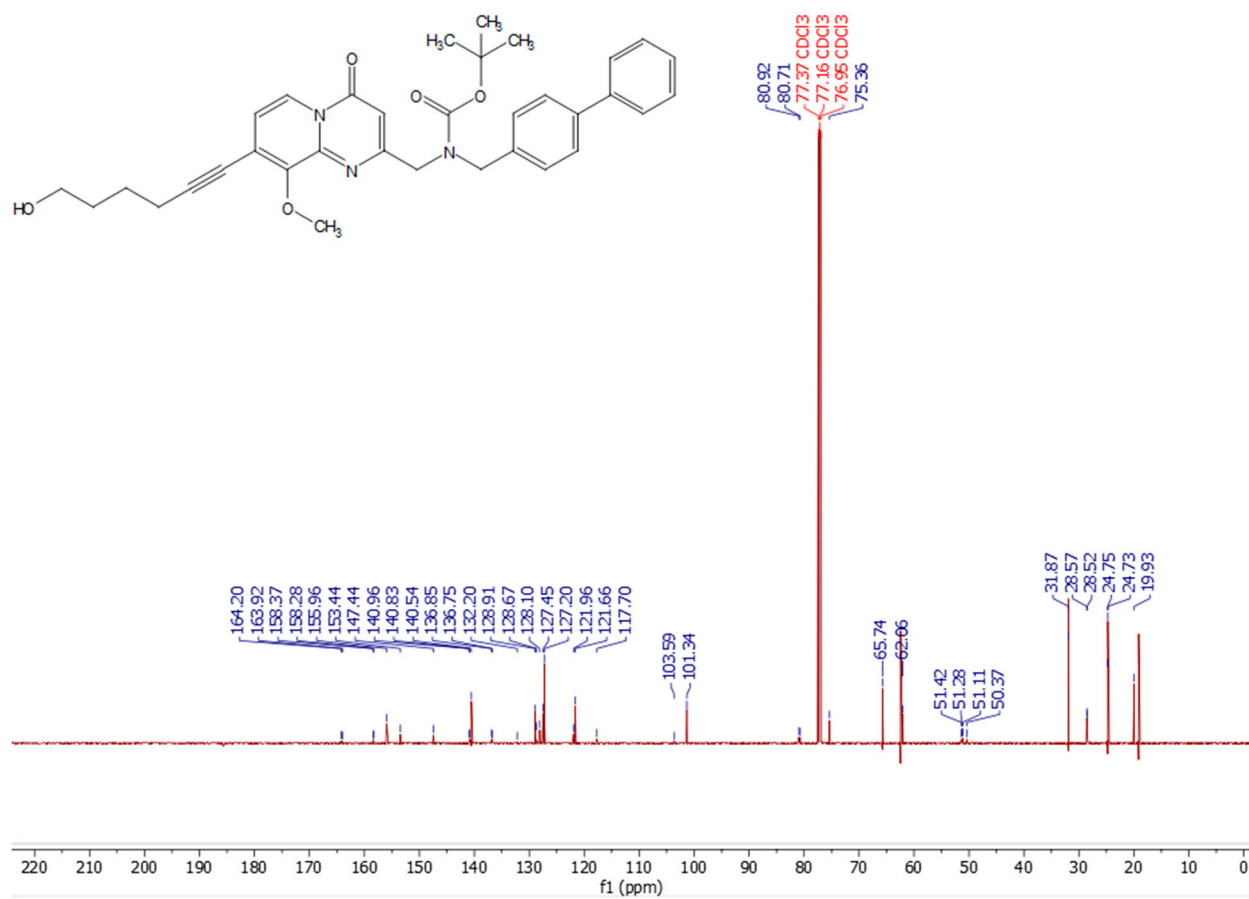

<sup>1</sup>H NMR of **64**

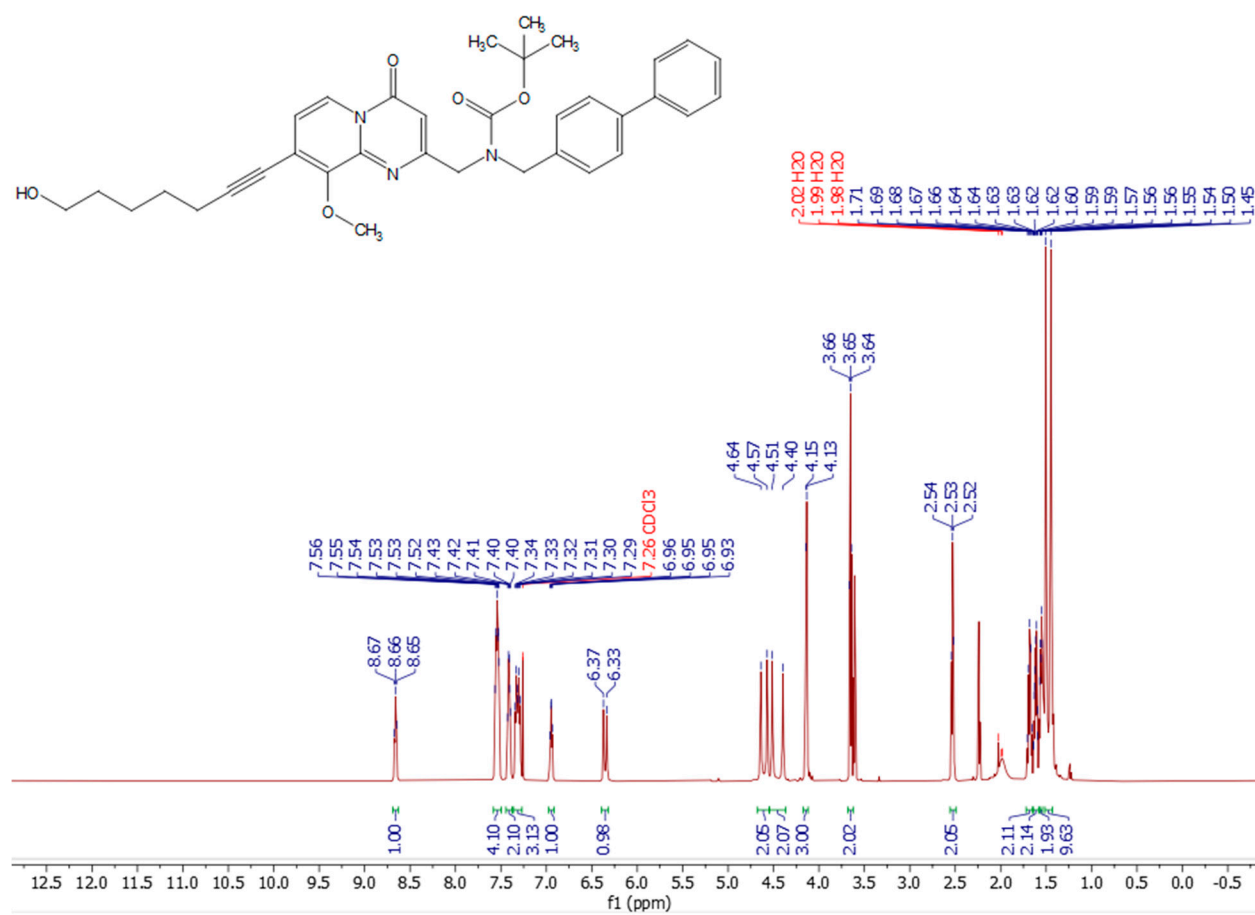

<sup>13</sup>C NMR of **64**

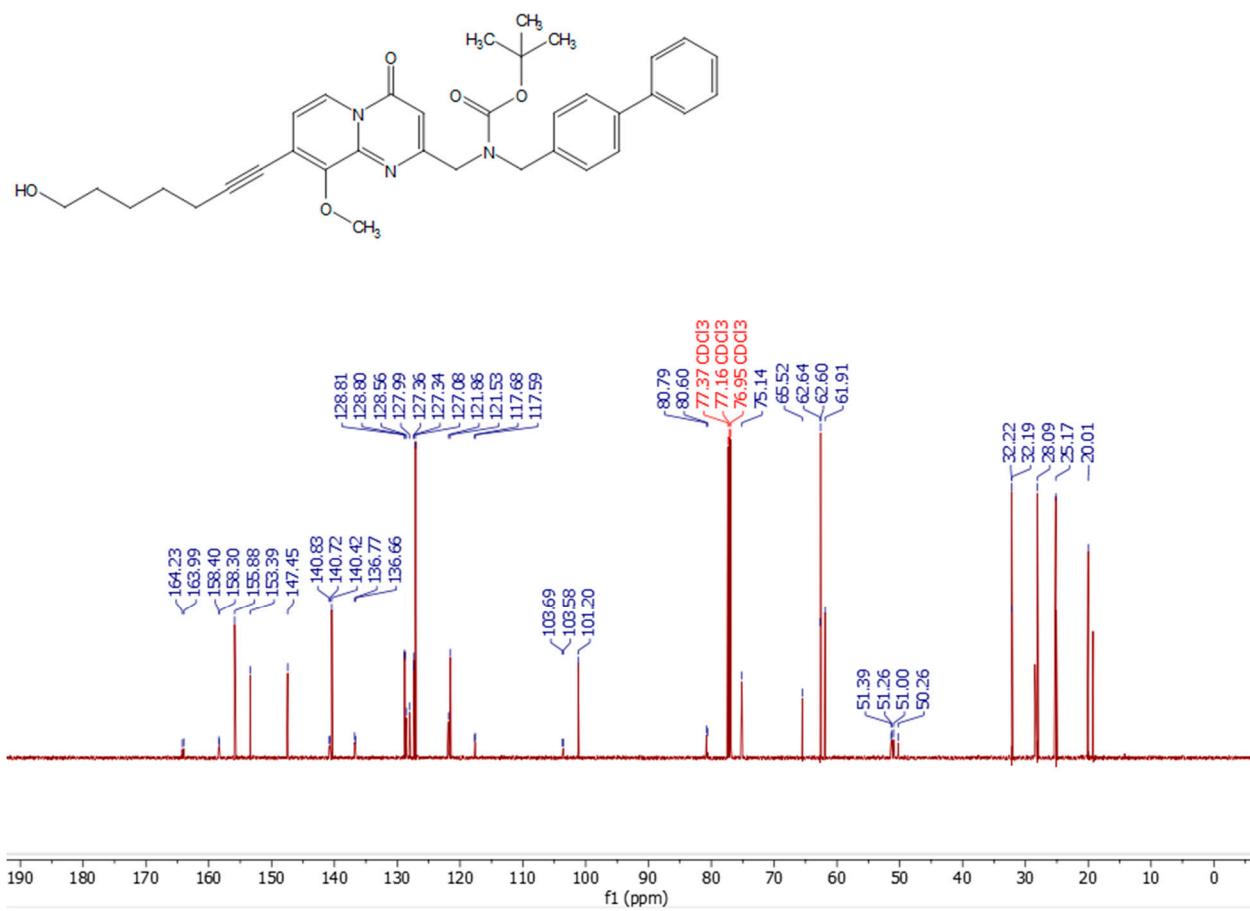

<sup>1</sup>H NMR of **65**

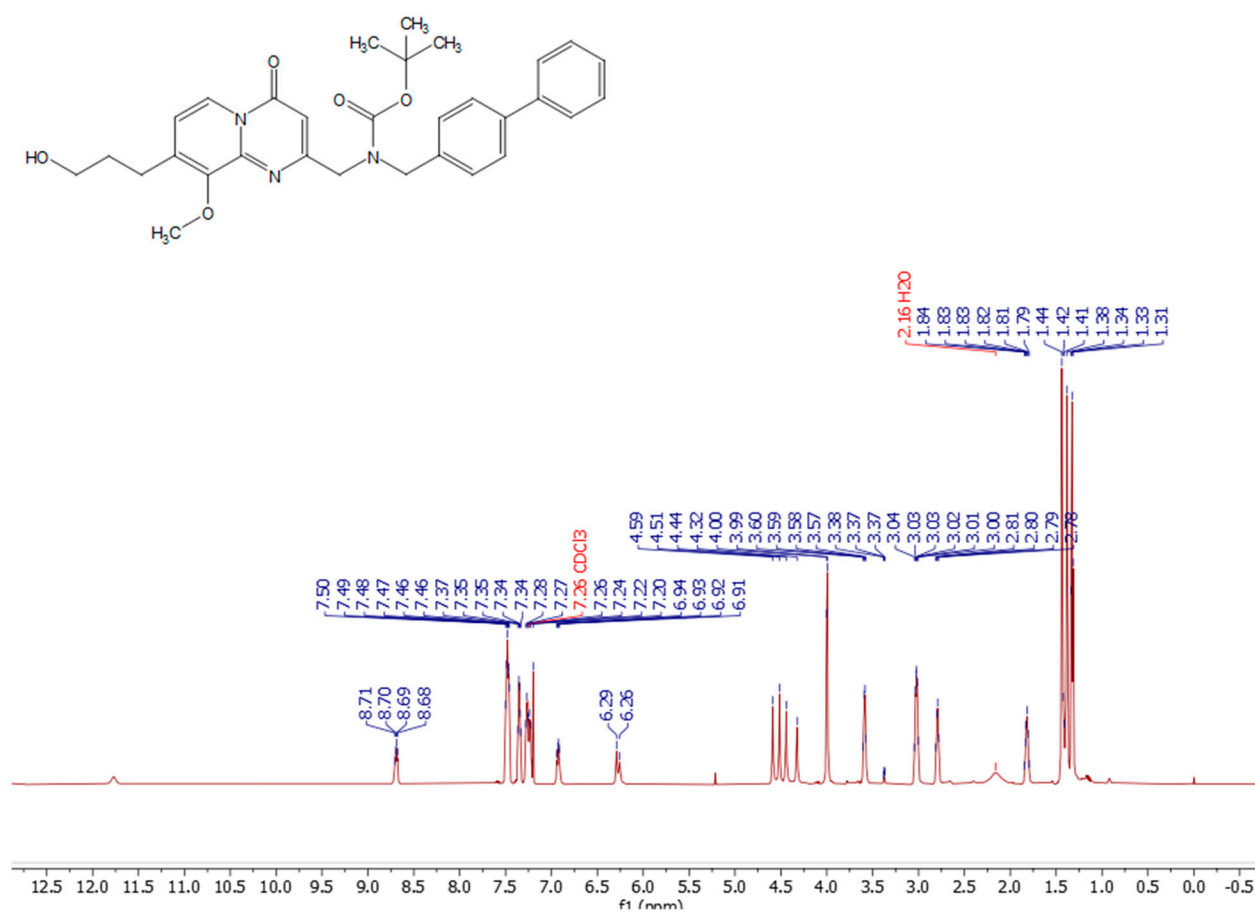

<sup>13</sup>C NMR of **65**

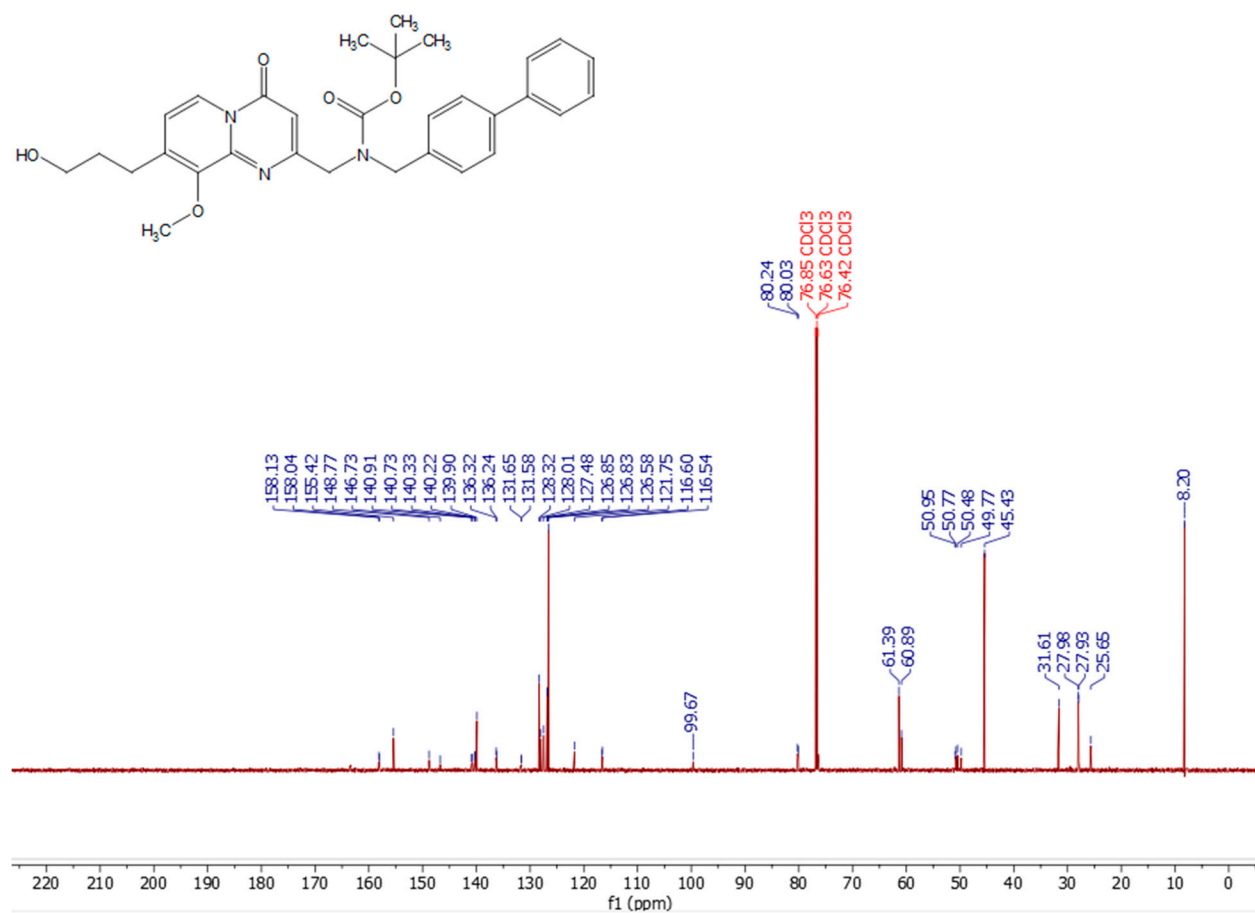

<sup>1</sup>H NMR of 66

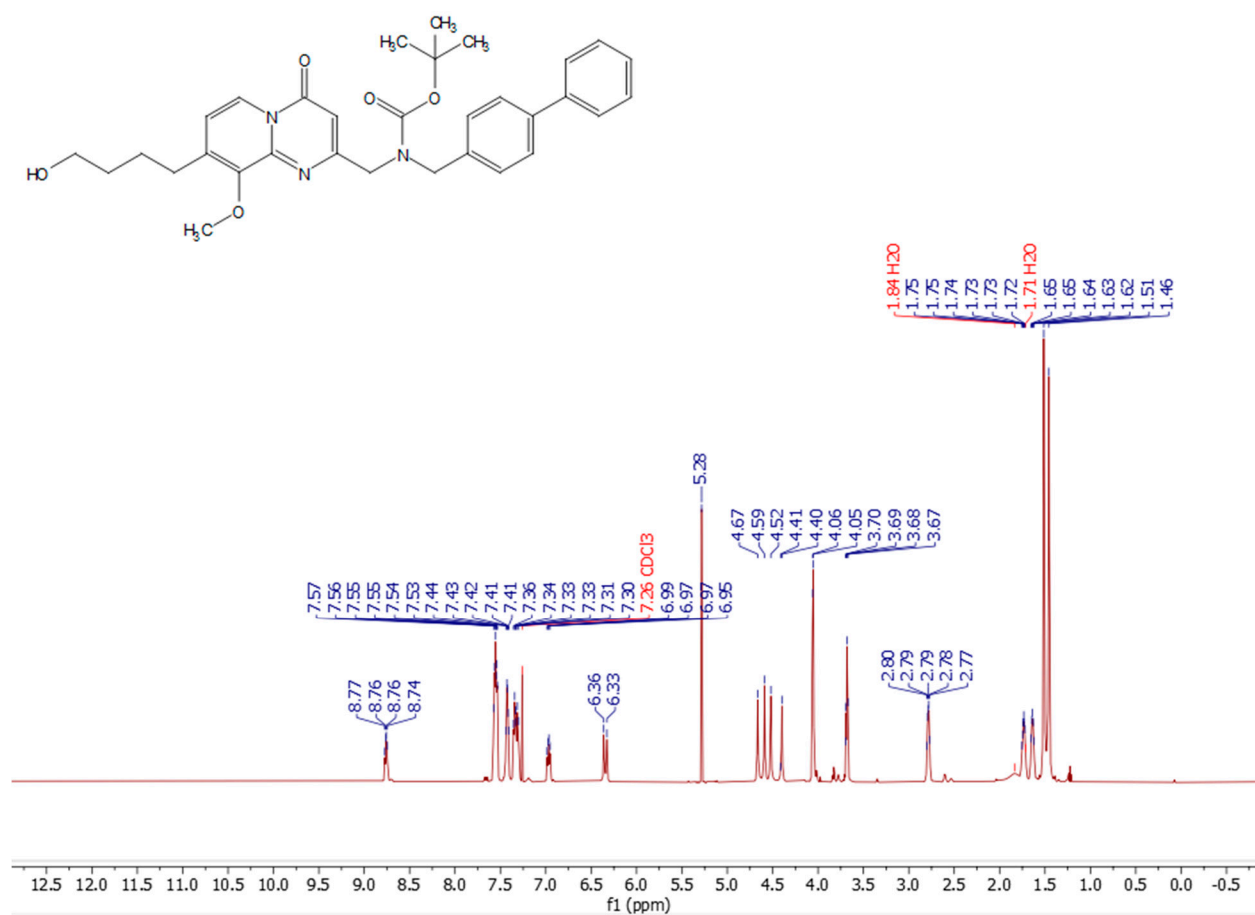



<sup>13</sup>C NMR of **66**

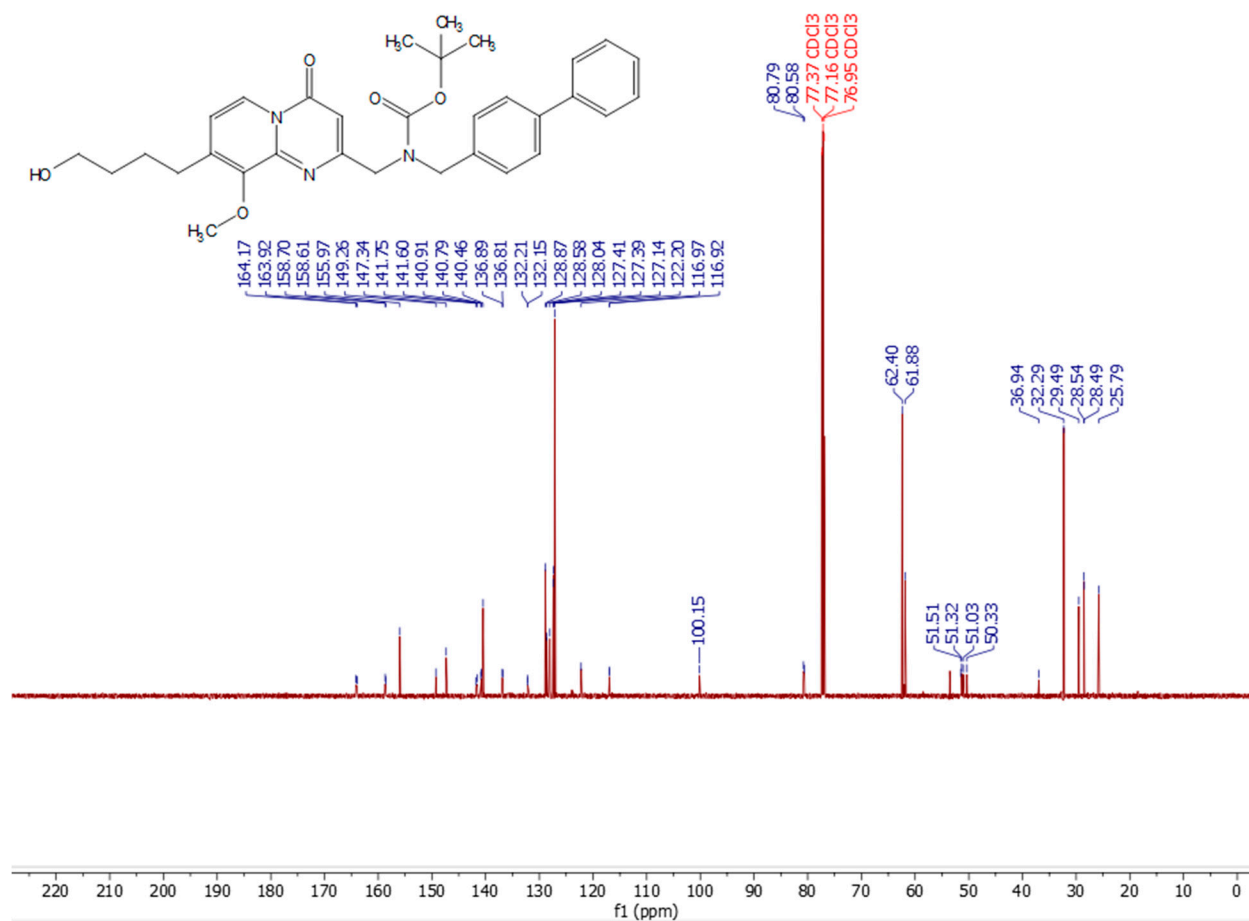

<sup>1</sup>H NMR of **67**

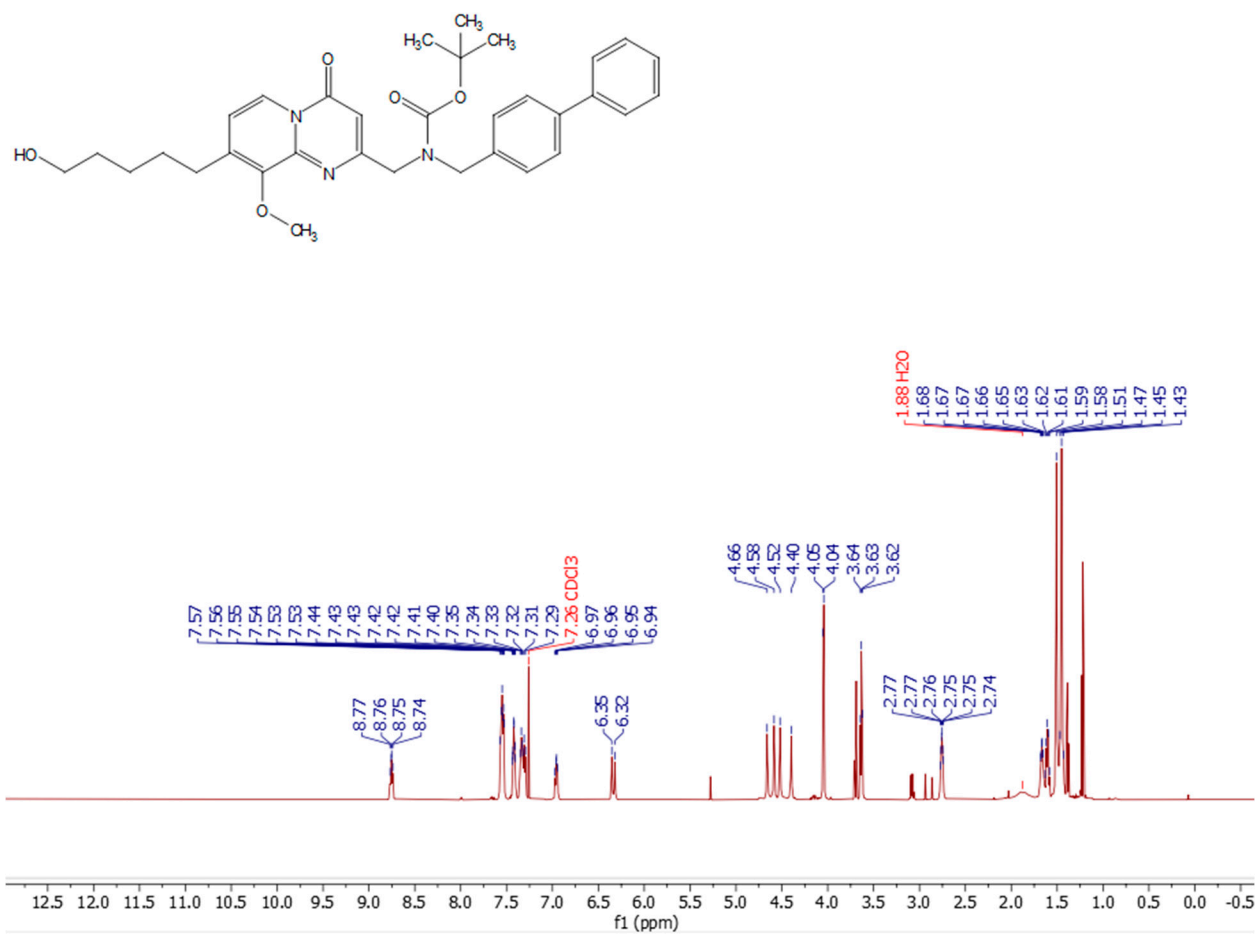

<sup>13</sup>C NMR of **67**

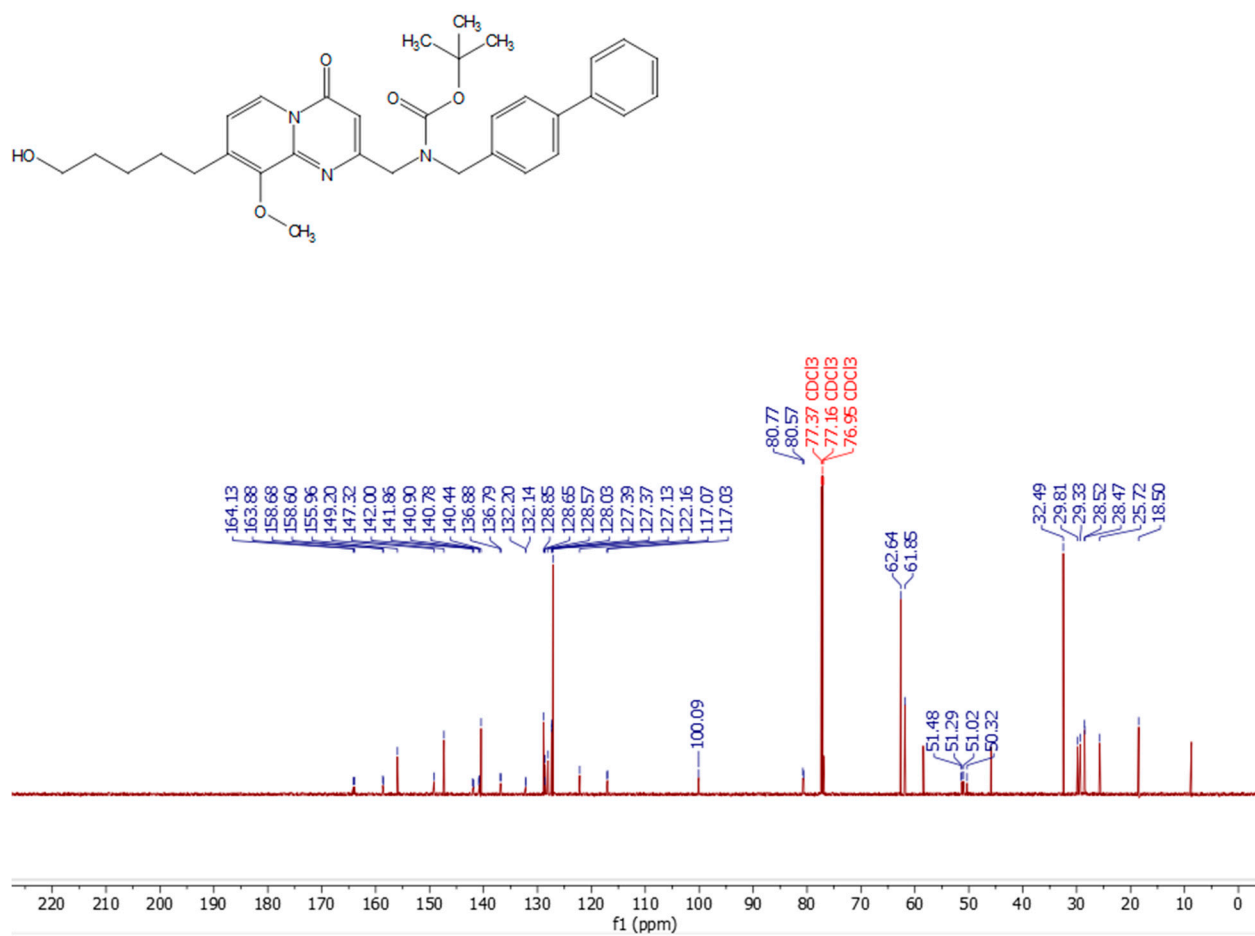

CCCCCCCCc1cc(OC)c2nc(CN(Cc3ccc(cc3)C(=O)OC(C)(C)C)c4ccccc4)c(=O)n2

<sup>1</sup>H NMR spectrum (CDCl<sub>3</sub>) of compound 10. The spectrum shows peaks from 1.42 to 7.70 ppm. Key features include a triplet at 7.32 ppm (7.28 CDCl<sub>3</sub>), a multiplet at 7.40-7.60 ppm, a doublet at 8.78 ppm (8.80, 8.77), a doublet at 6.34 ppm (6.38), a multiplet at 3.60-3.70 ppm, a multiplet at 1.60-1.70 ppm (1.68 H<sub>2</sub>O), and a multiplet at 1.40-1.50 ppm (1.69 H<sub>2</sub>O). Integration values are shown below the peaks.

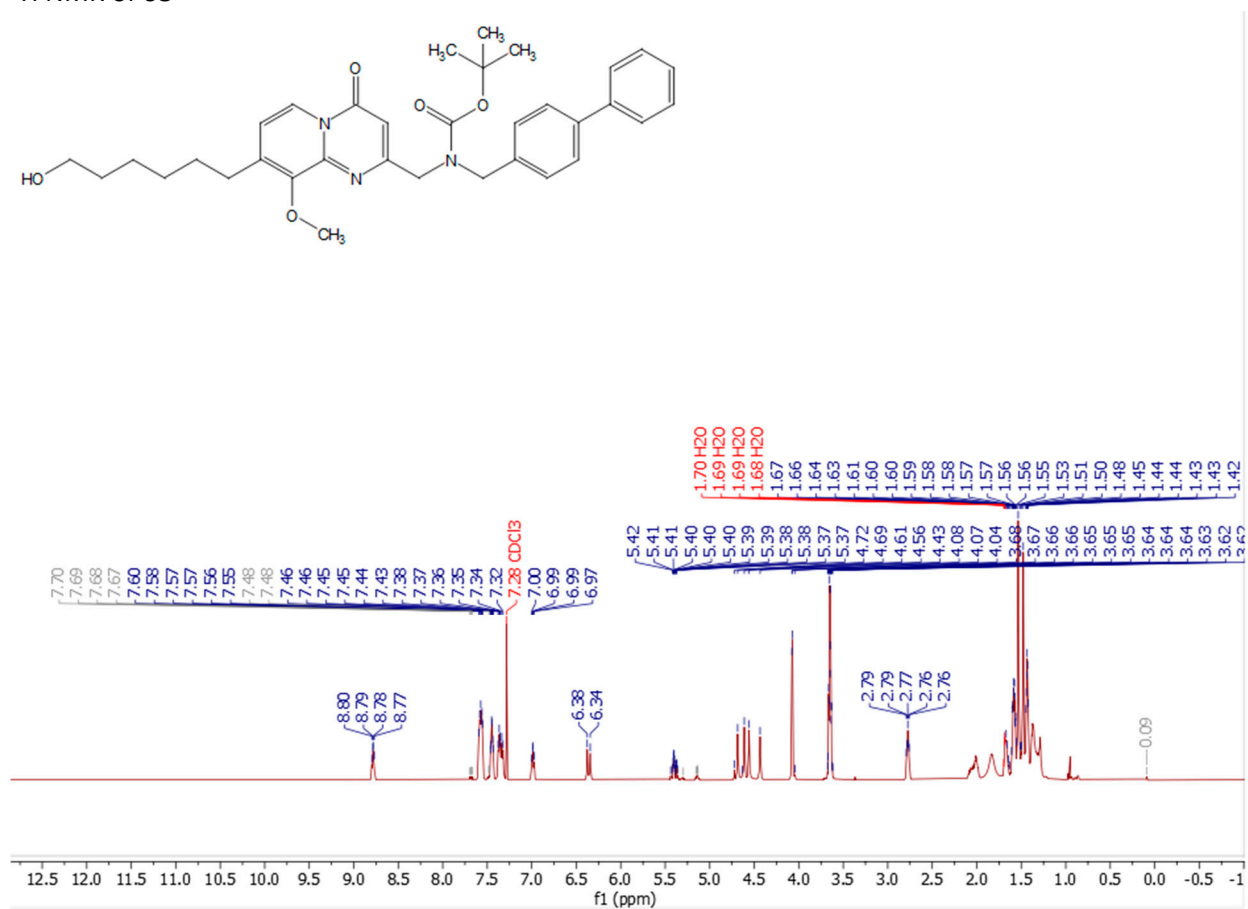

<sup>13</sup>C NMR of **68**

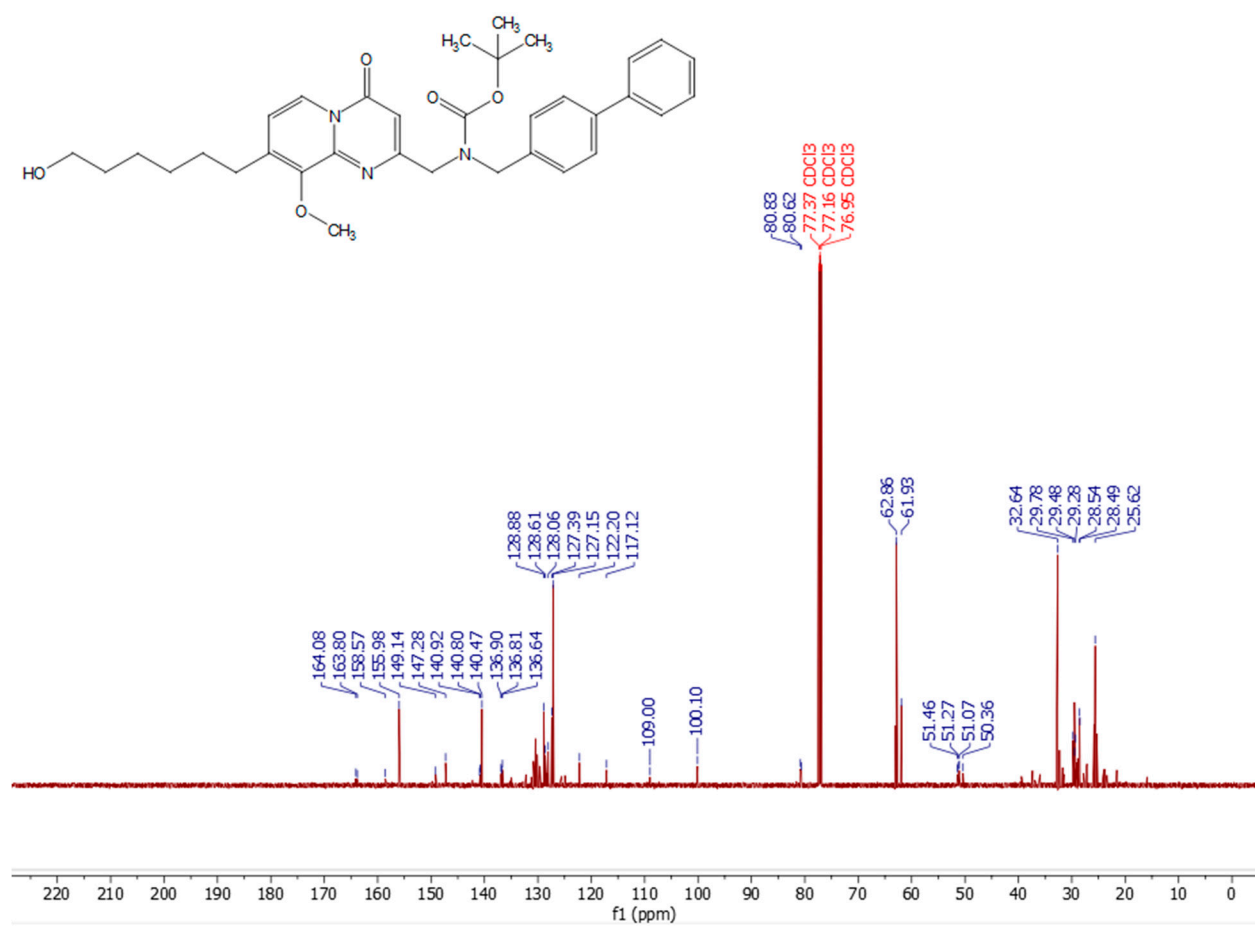

<sup>1</sup>H NMR of 69

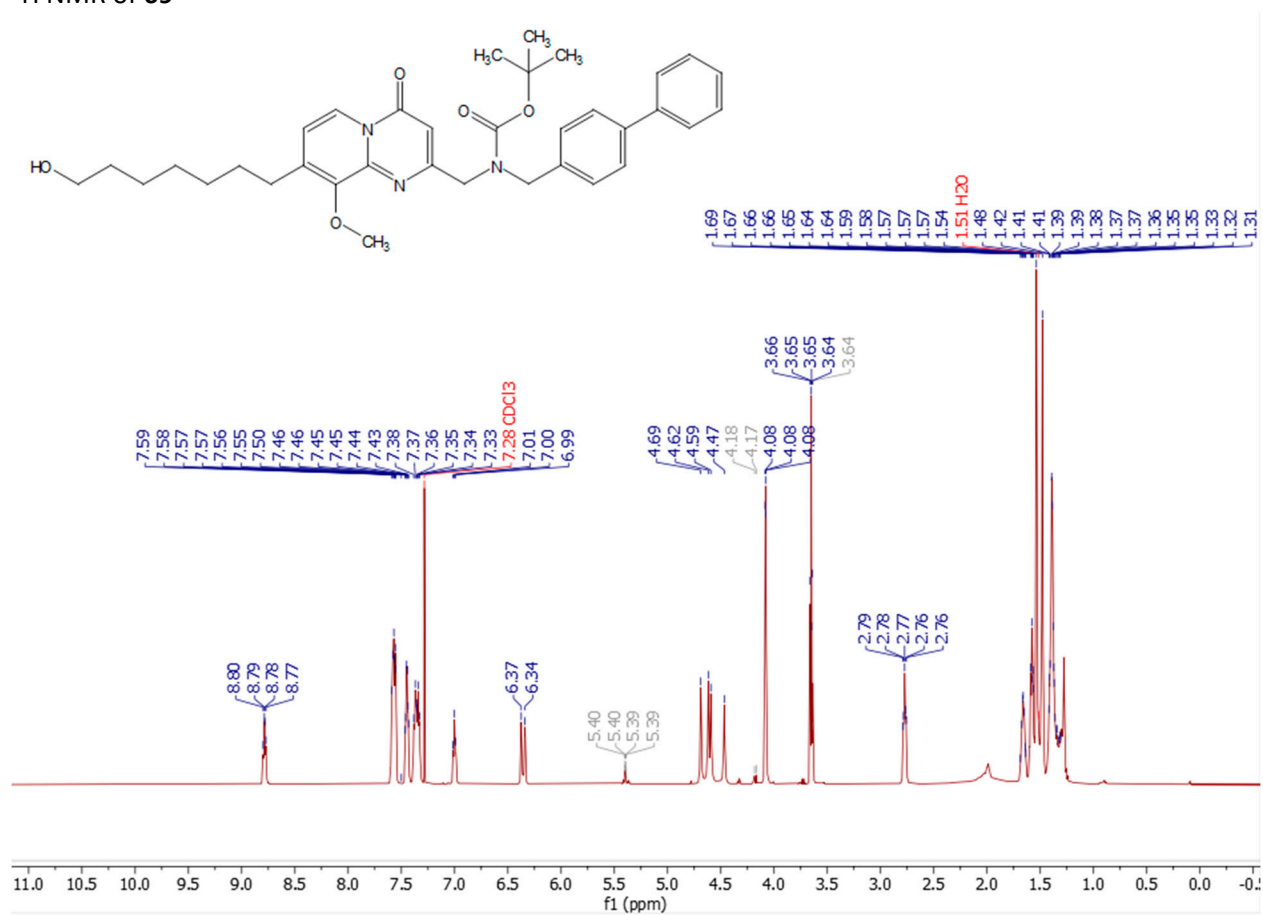

<sup>13</sup>C NMR of **69**

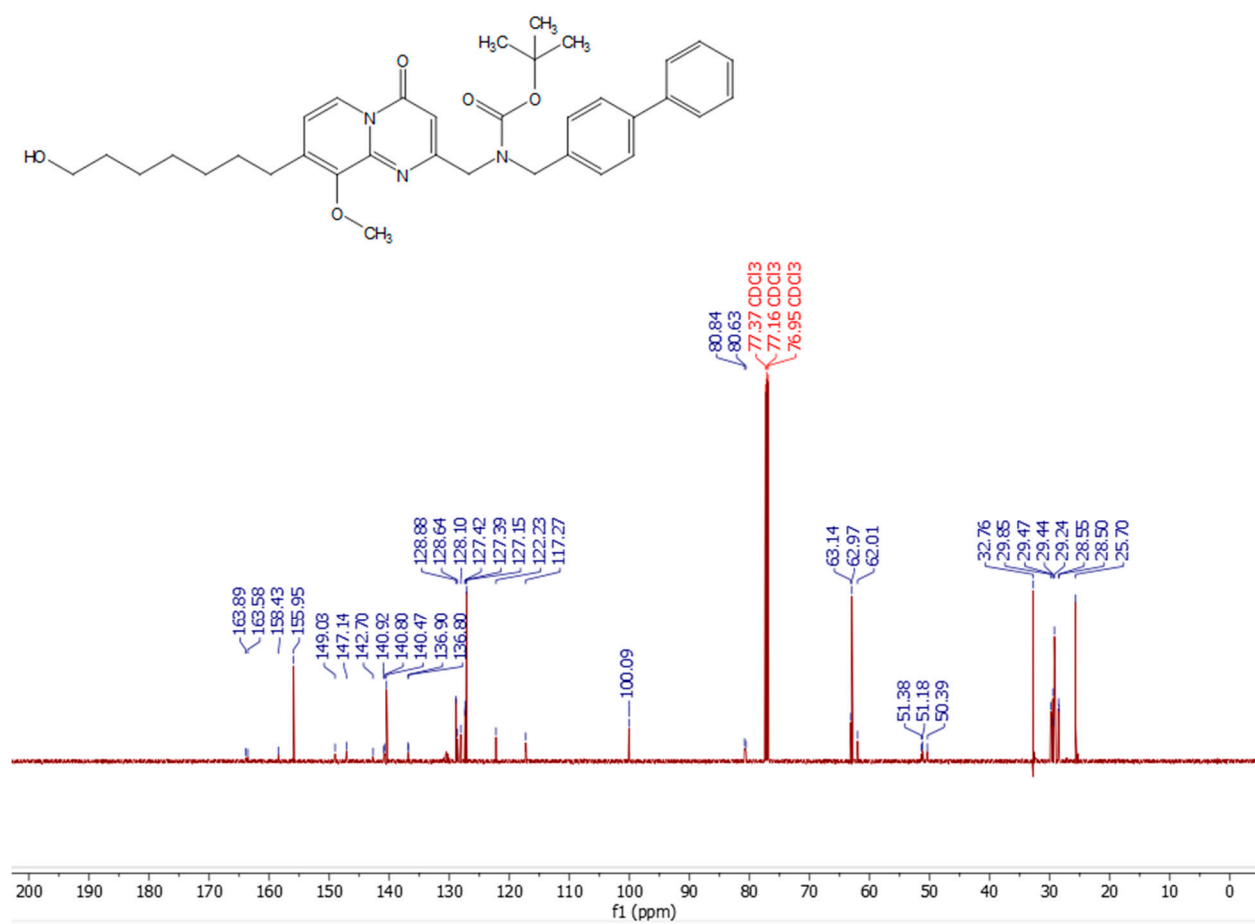

<sup>1</sup>H NMR of **70**

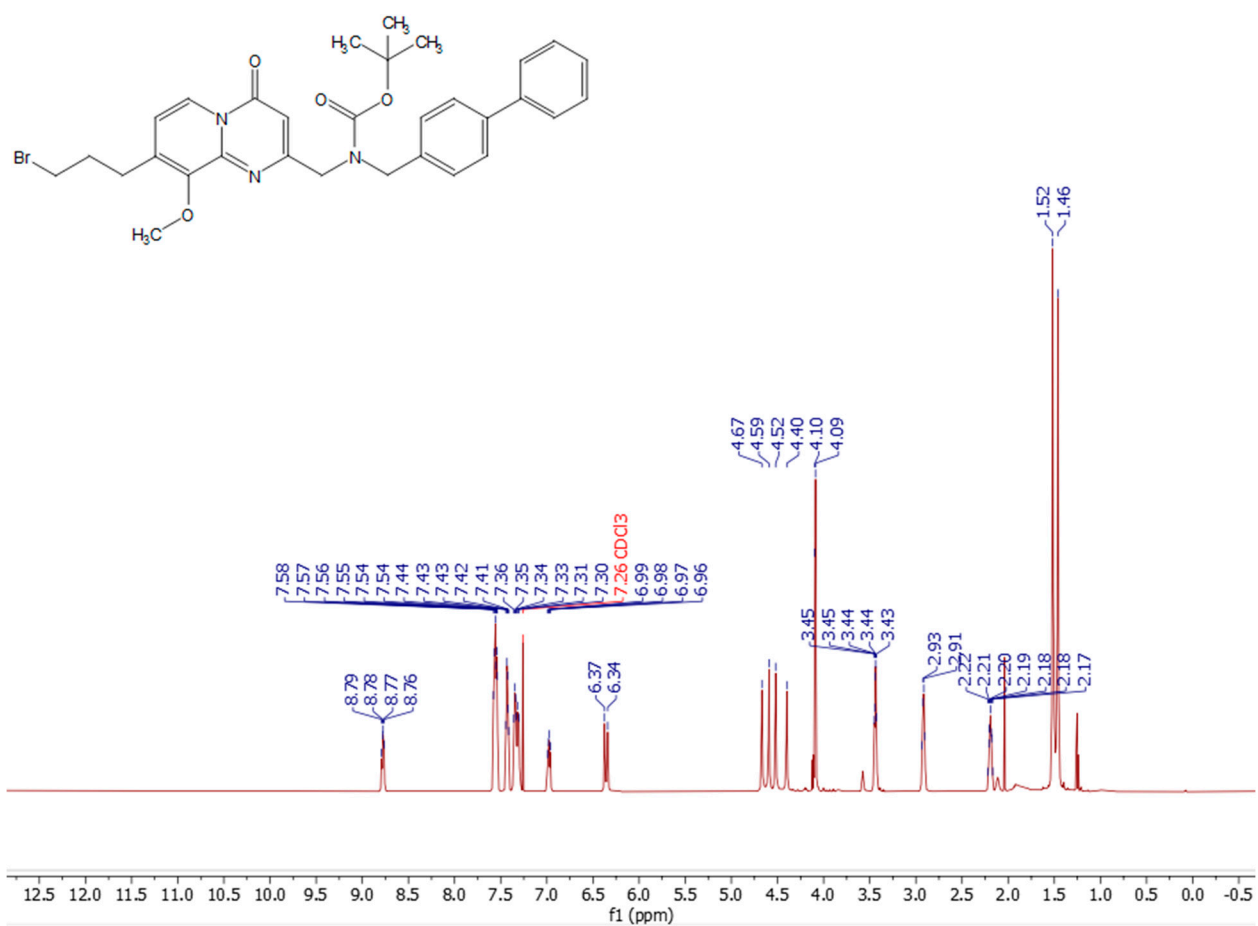



<sup>13</sup>C NMR of **70**

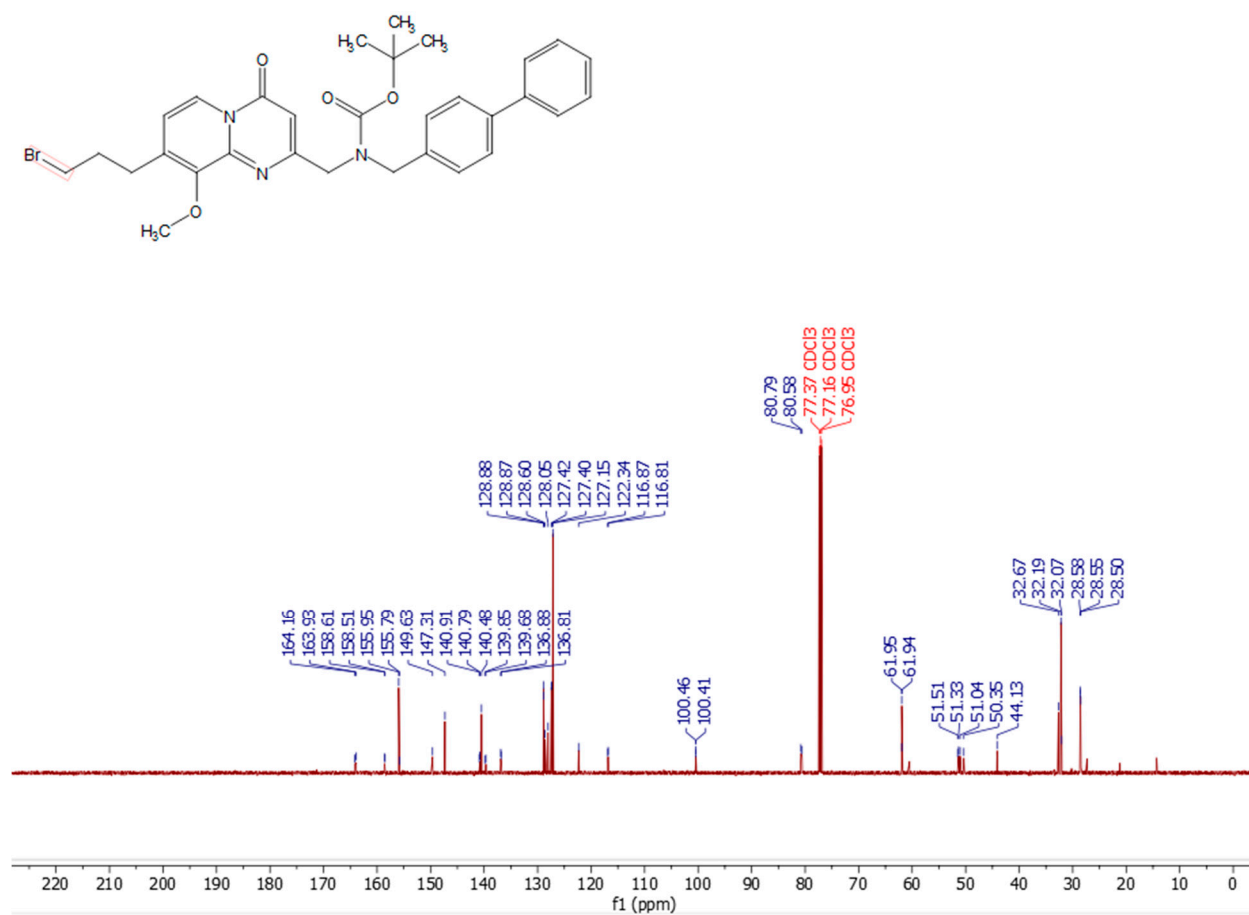

<sup>1</sup>H NMR of **71**

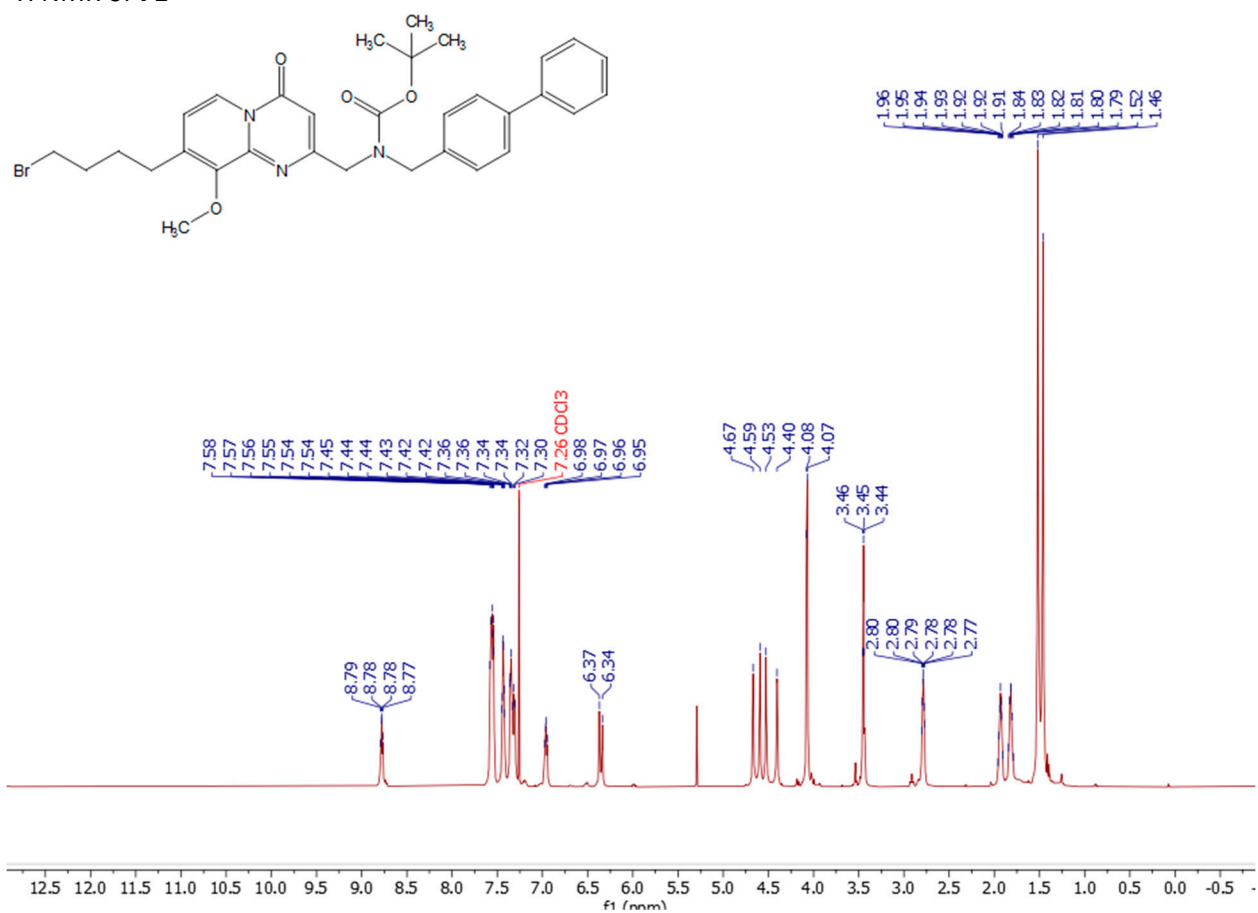

<sup>13</sup>C NMR of **71**

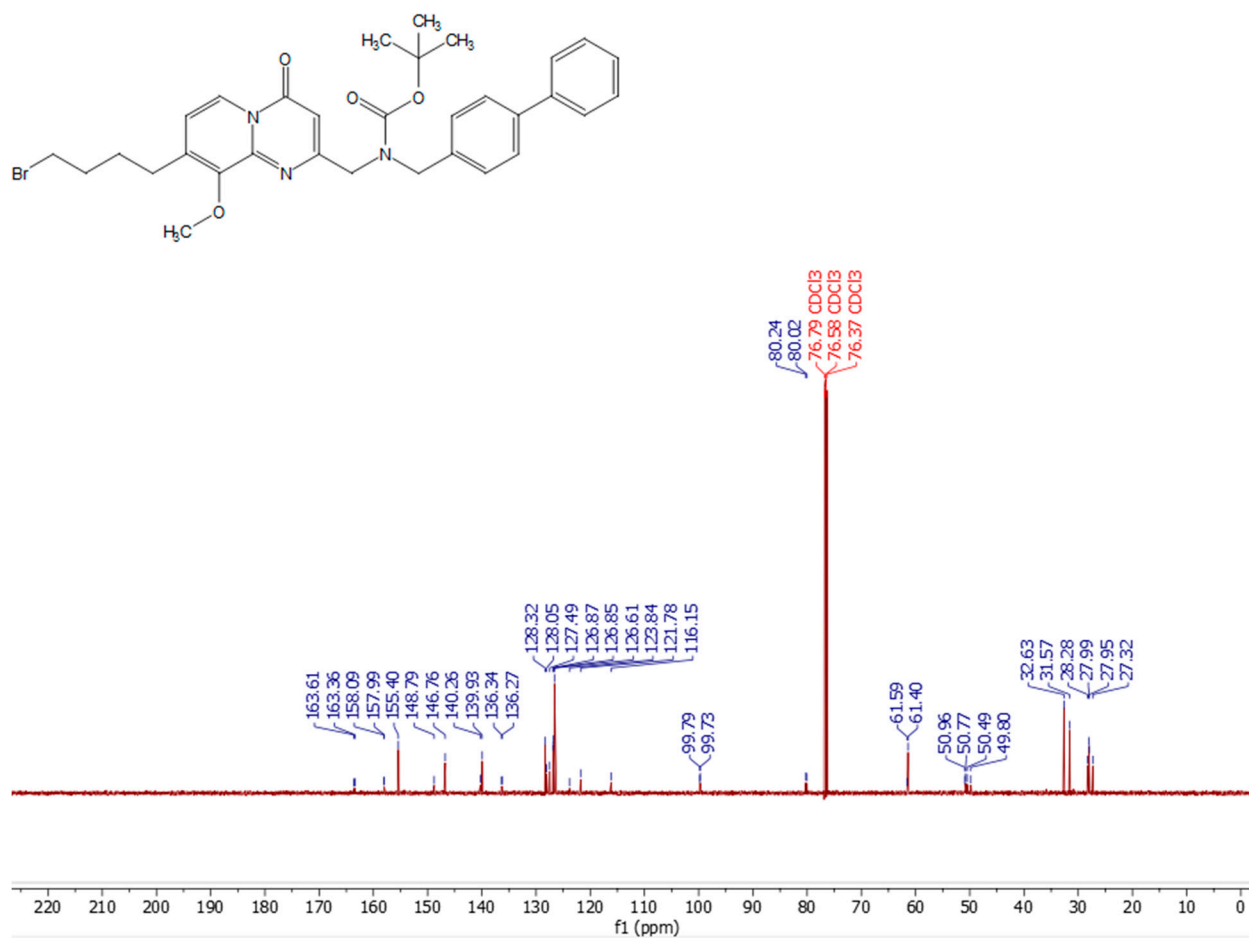

<sup>1</sup>H NMR of **72**

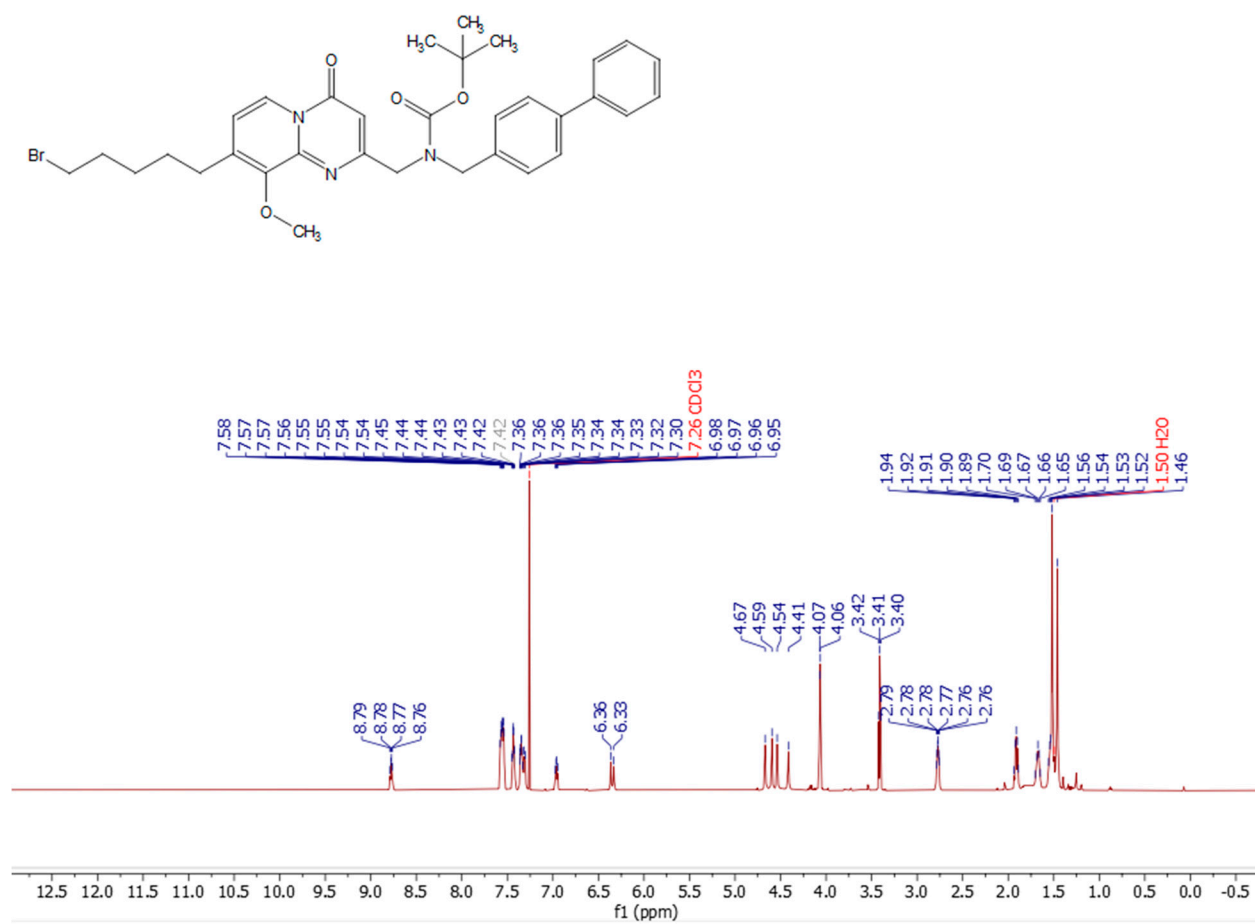

$^{13}\text{C}$  NMR of **72**

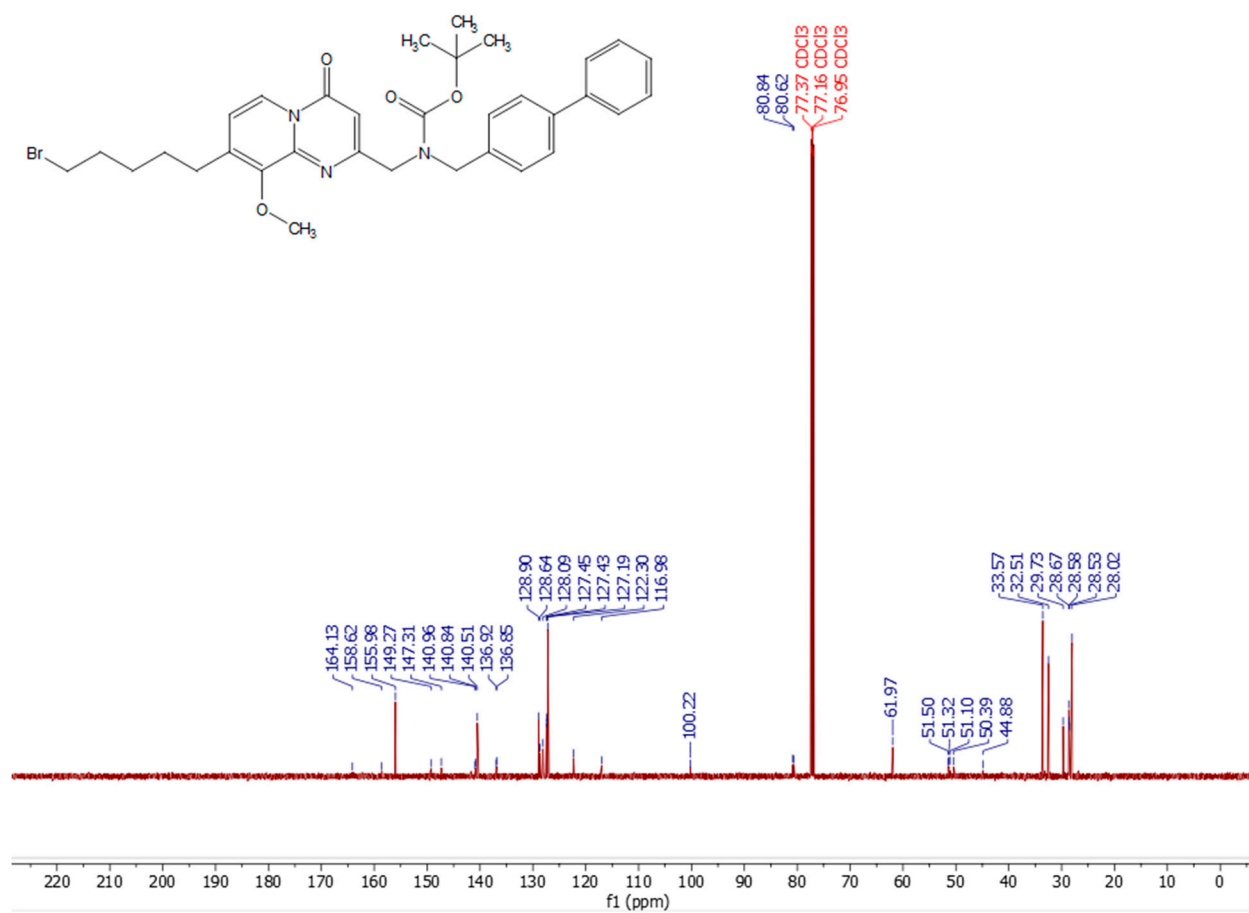

<sup>1</sup>H NMR of **73**

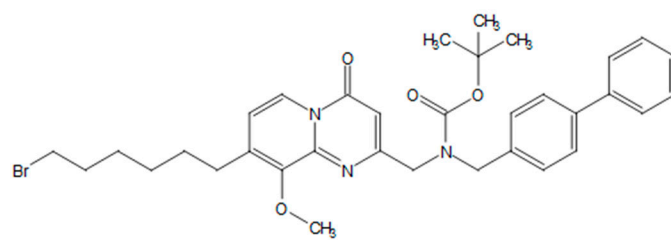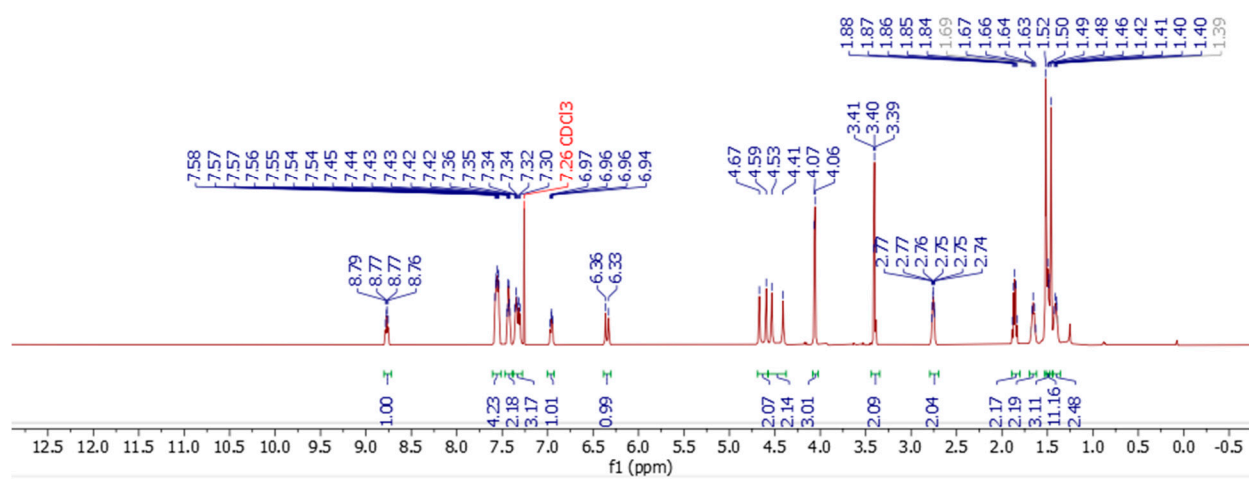

<sup>13</sup>C NMR of **73**

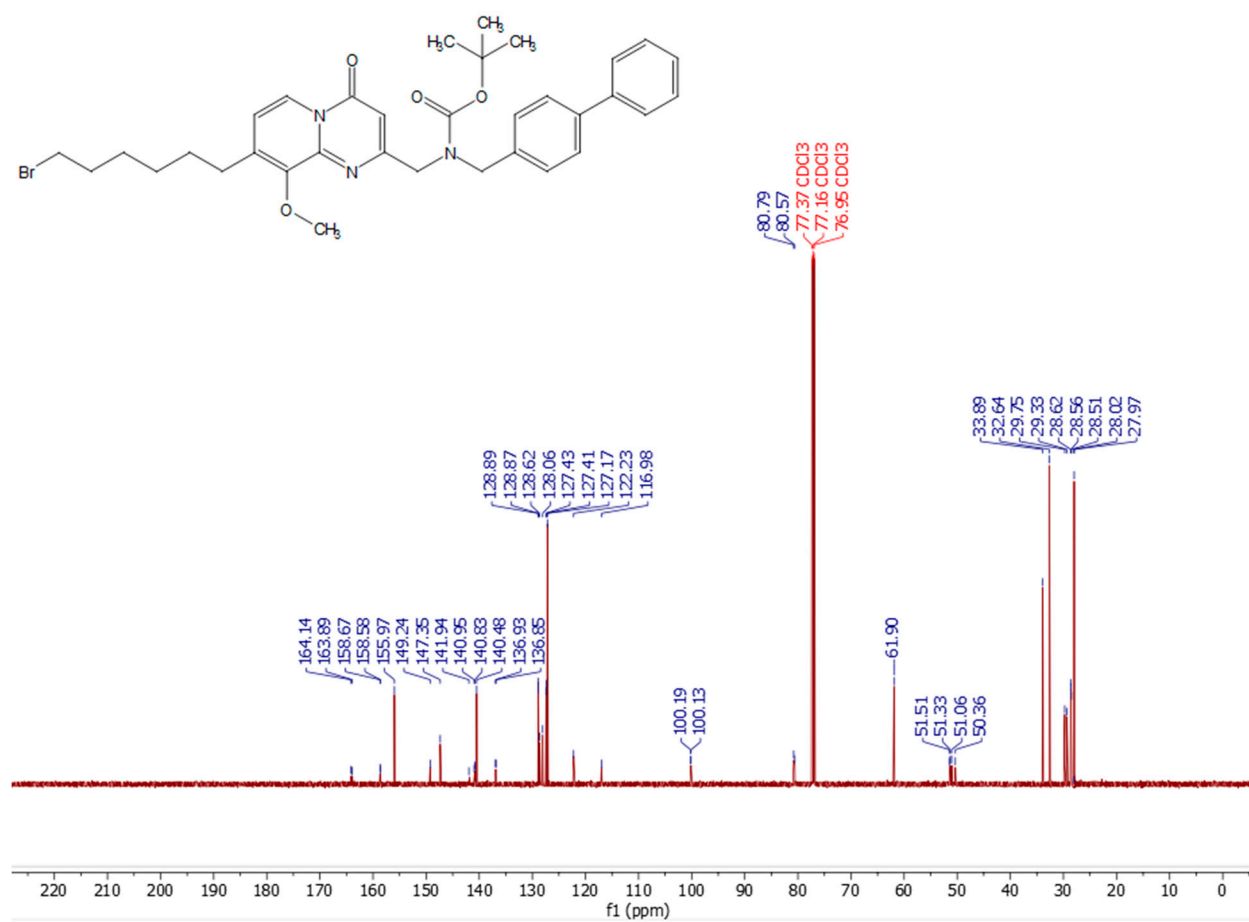

<sup>1</sup>H NMR of **74**

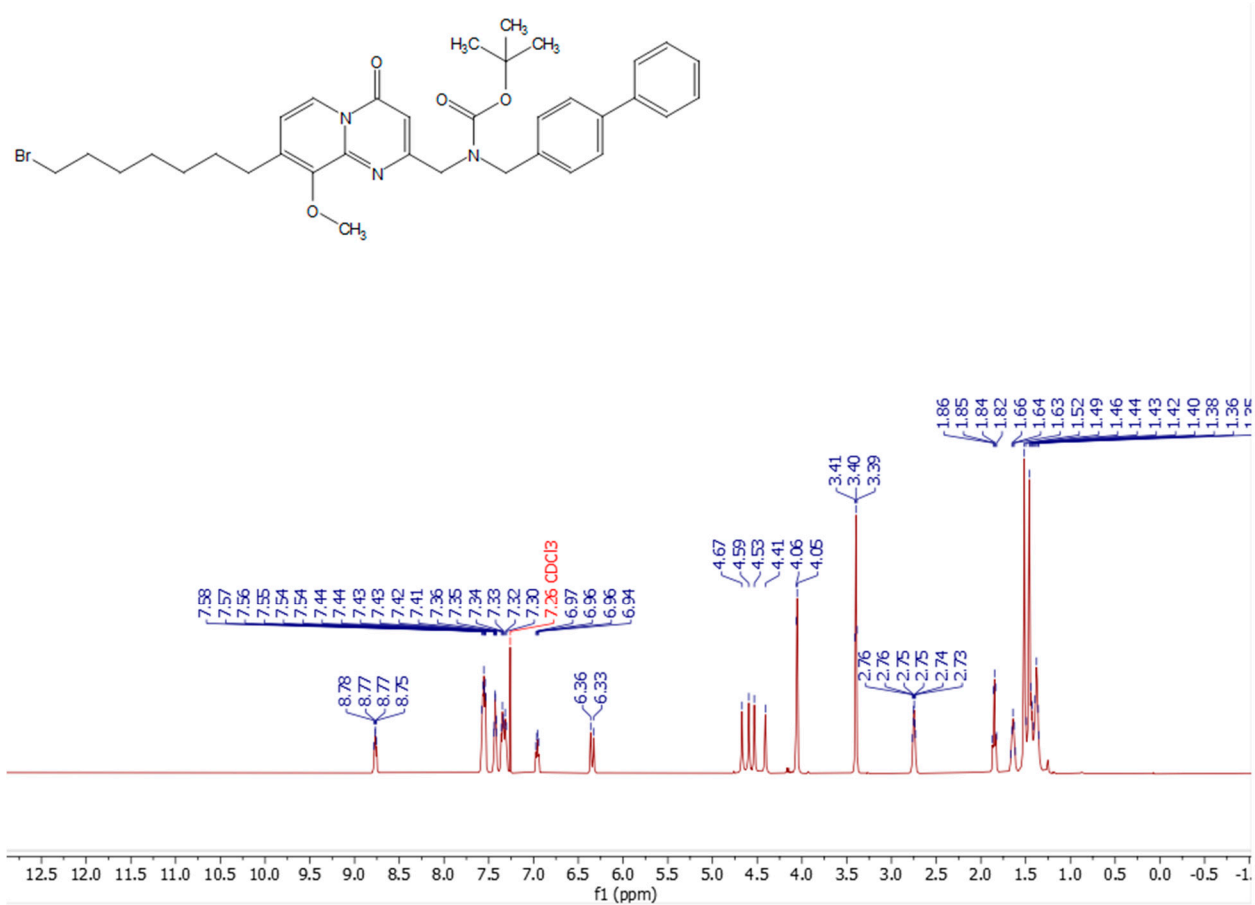



<sup>13</sup>C NMR of **74**

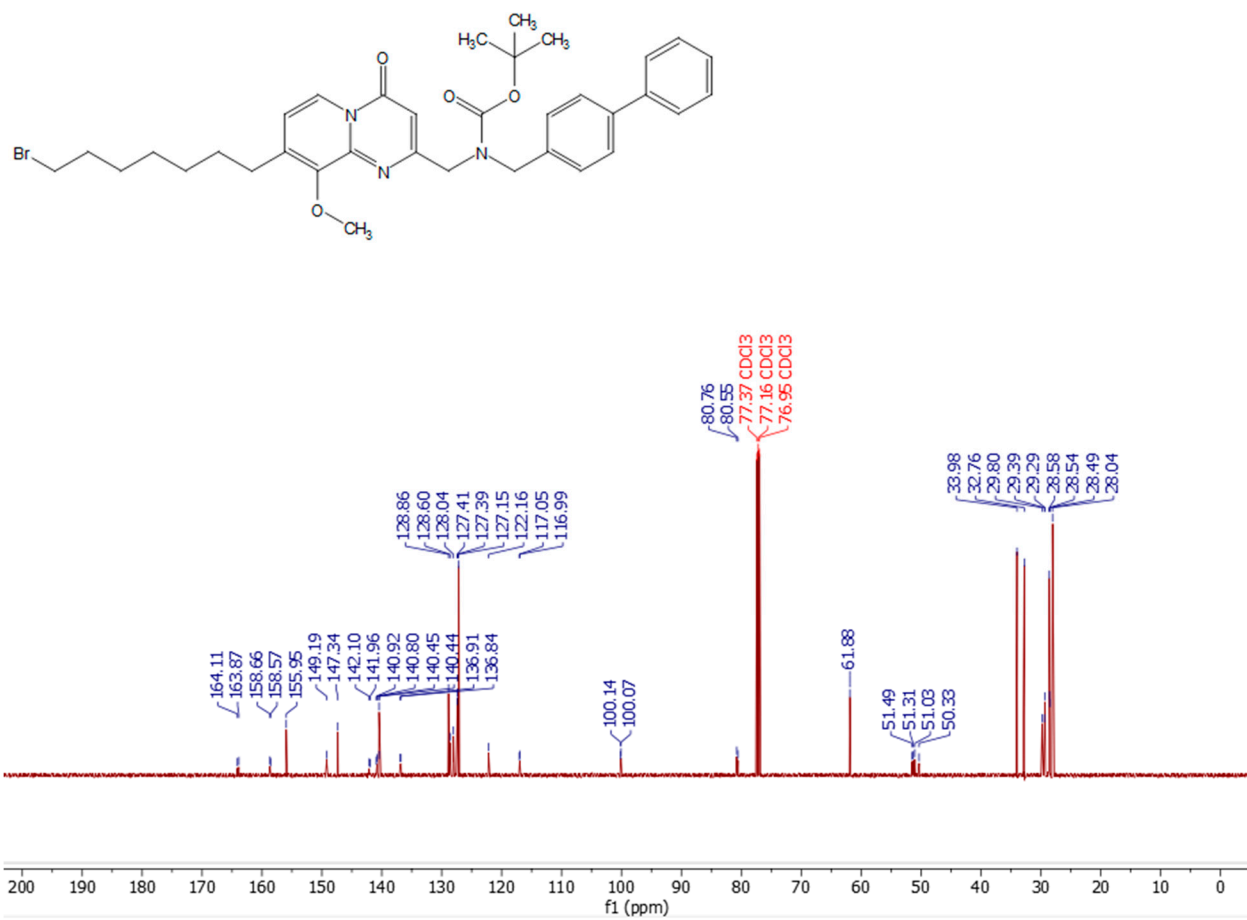

<sup>1</sup>H NMR of **80**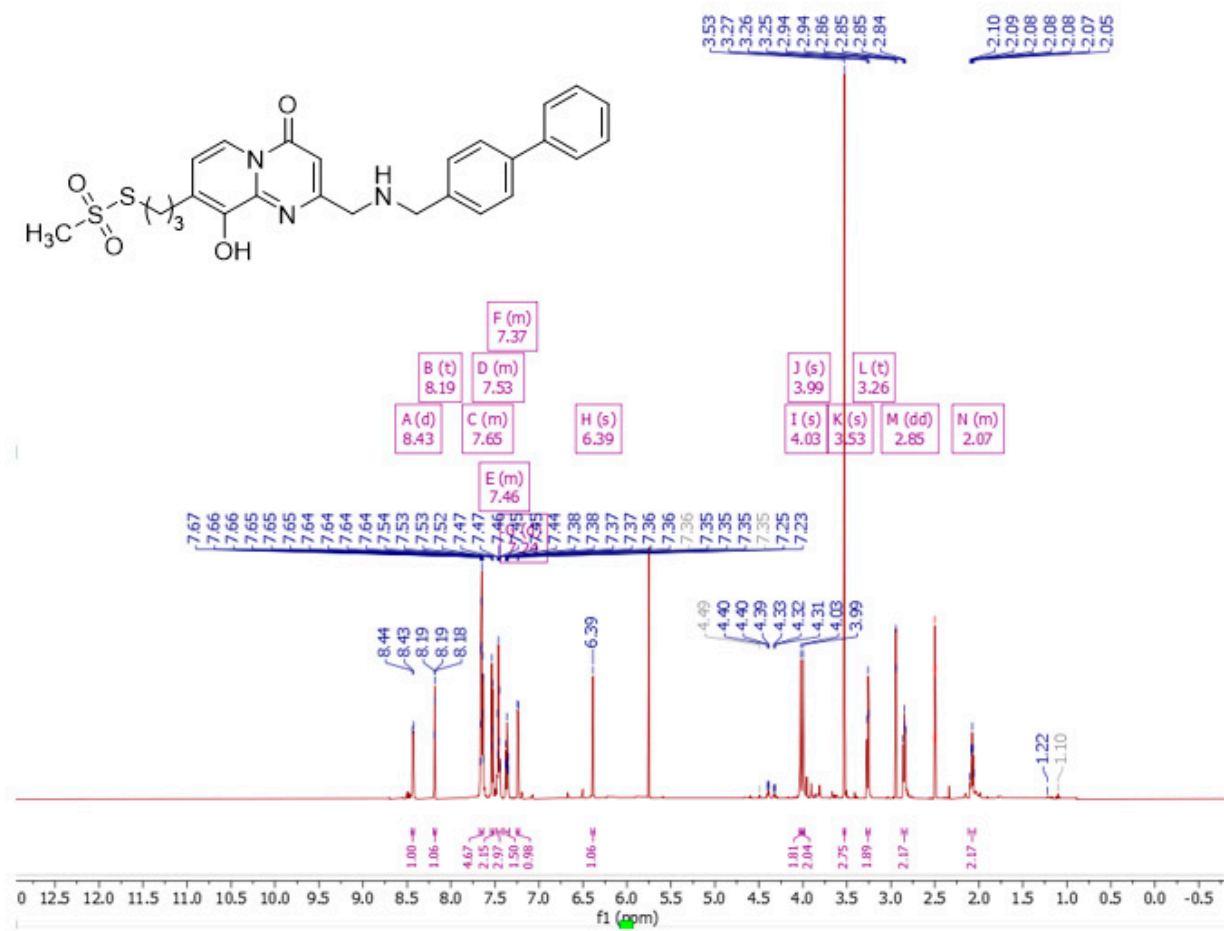

<sup>13</sup>C NMR of **80**

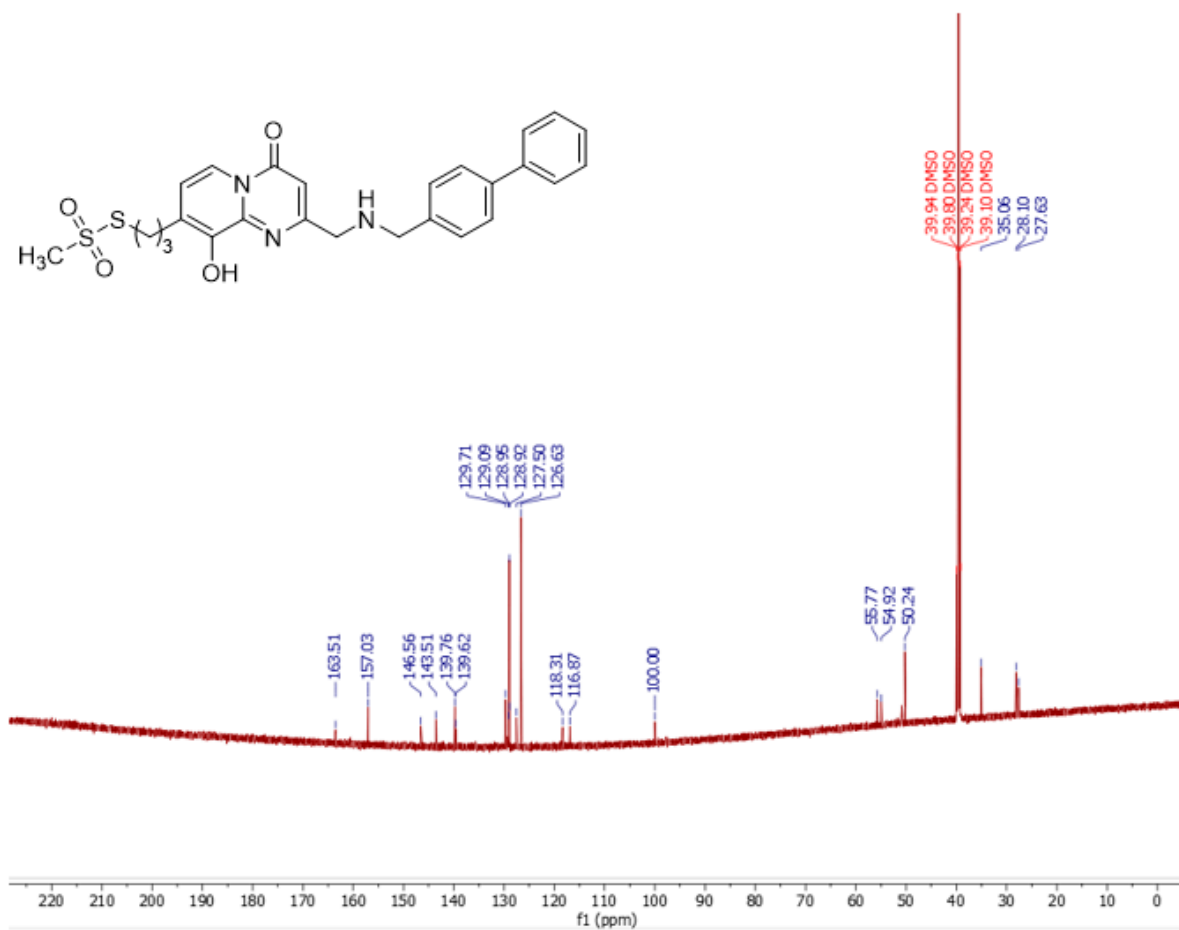

<sup>1</sup>H NMR of **81**

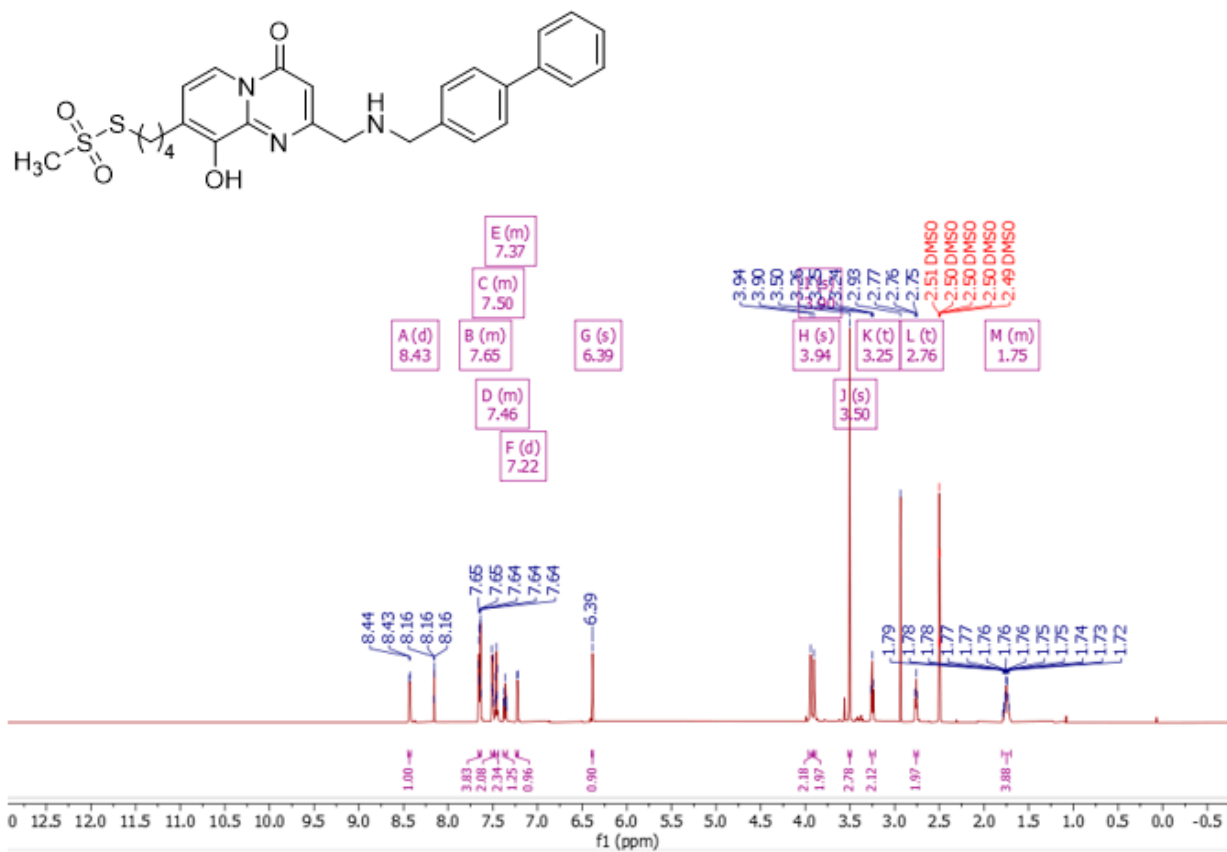

<sup>13</sup>C NMR of **81**

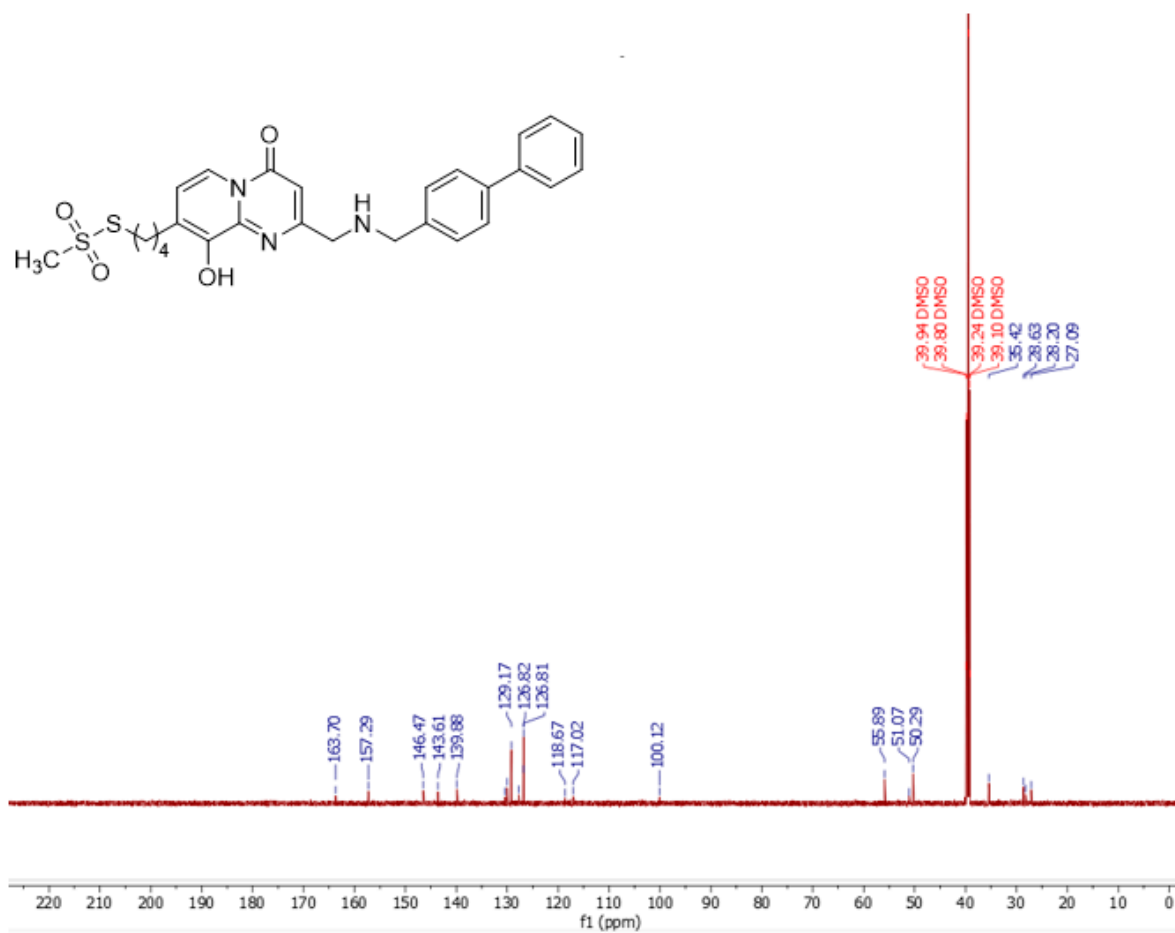

<sup>1</sup>H NMR of **82**

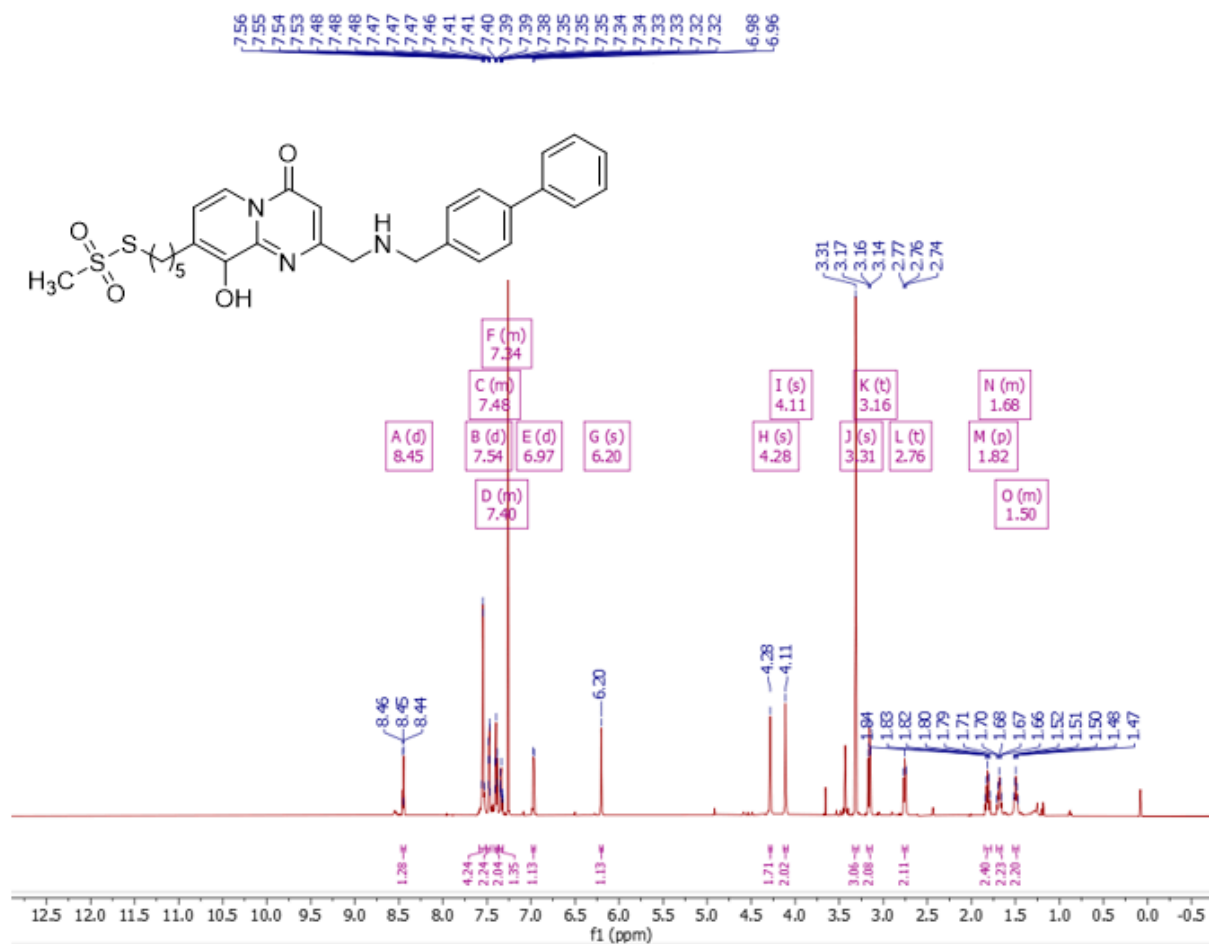

$^{13}\text{C}$  NMR of **82**

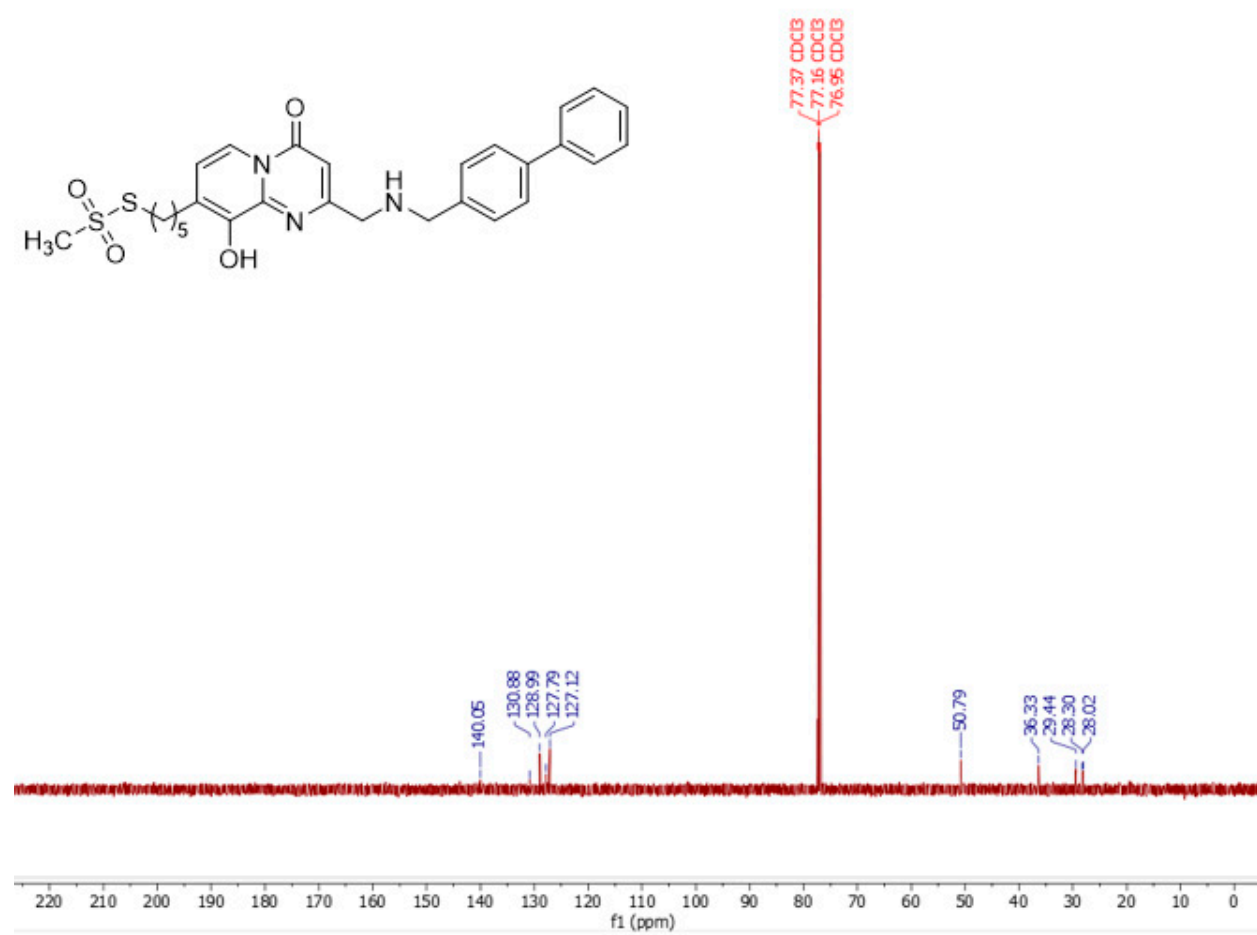

<sup>1</sup>H NMR of **83**

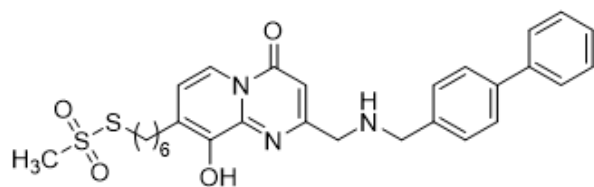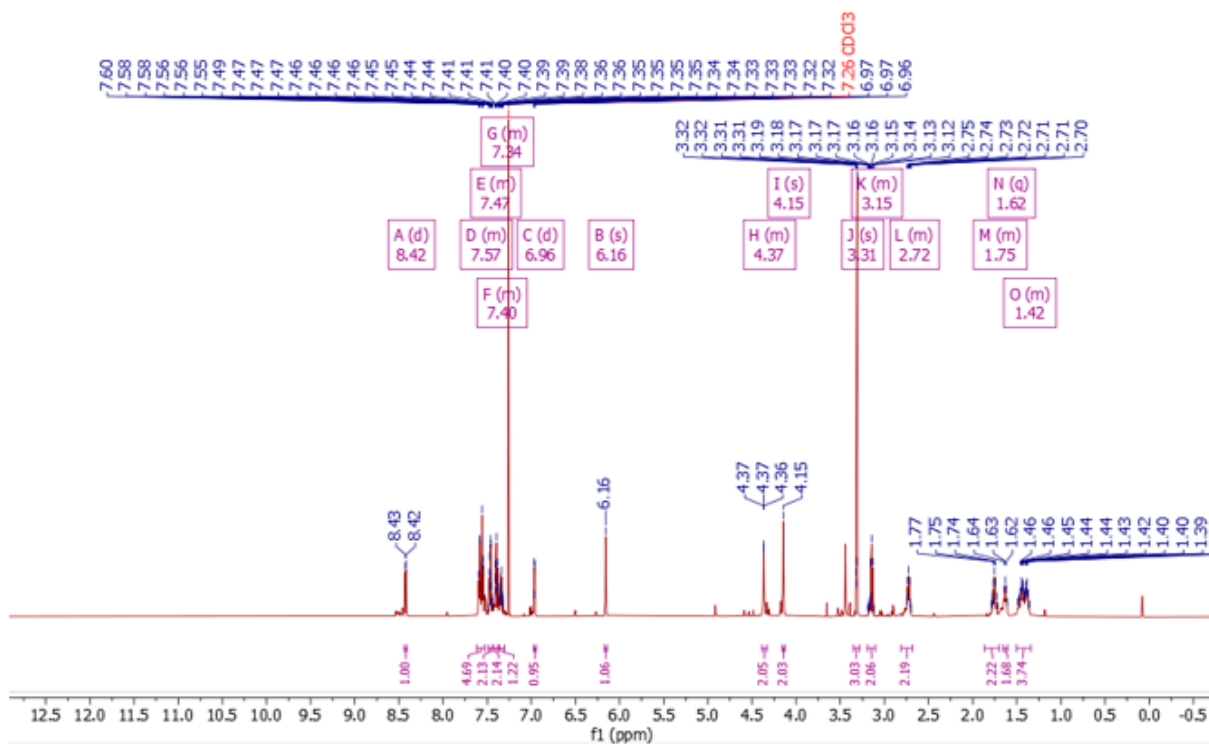



<sup>13</sup>C NMR of **83**

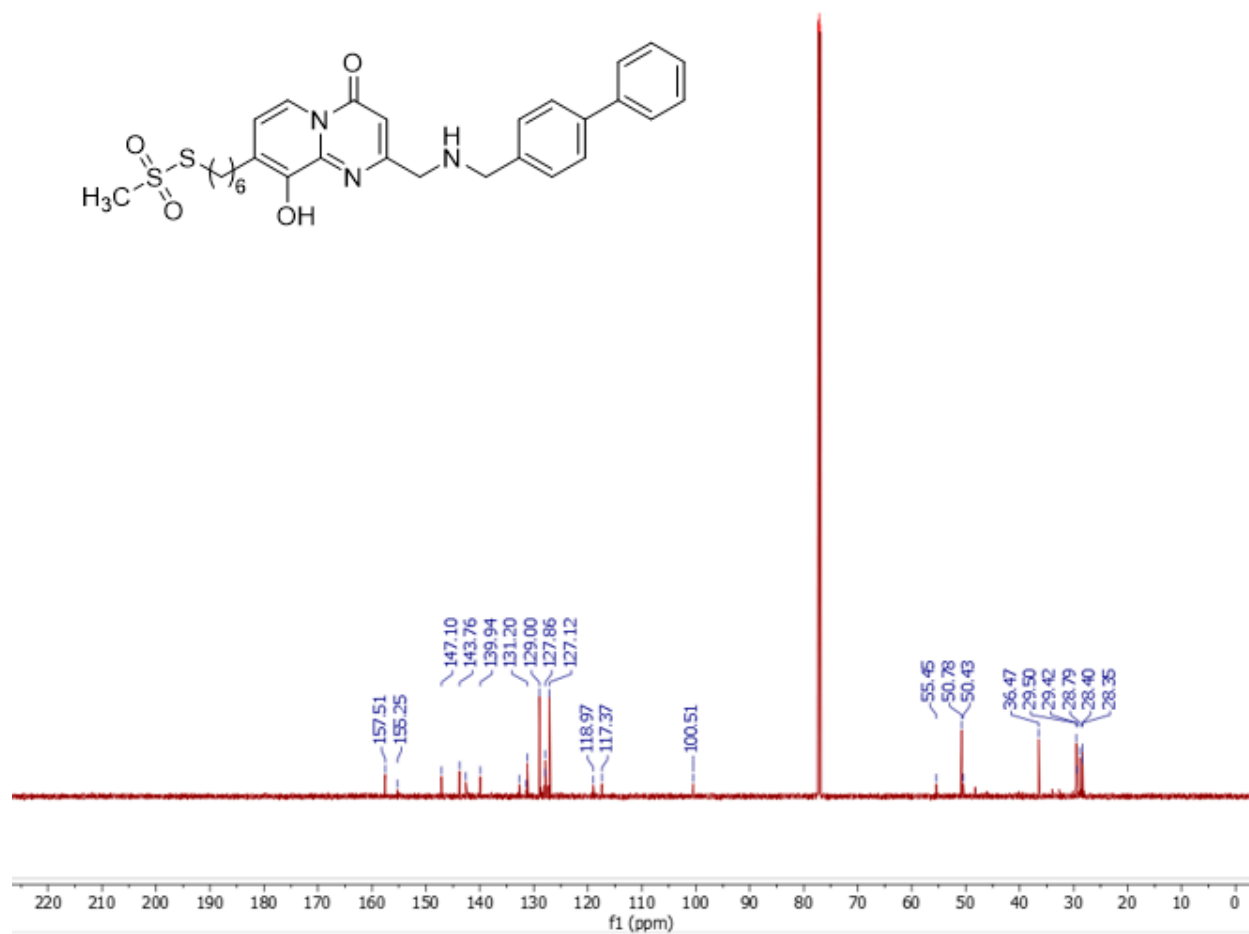

<sup>1</sup>H NMR of **84**

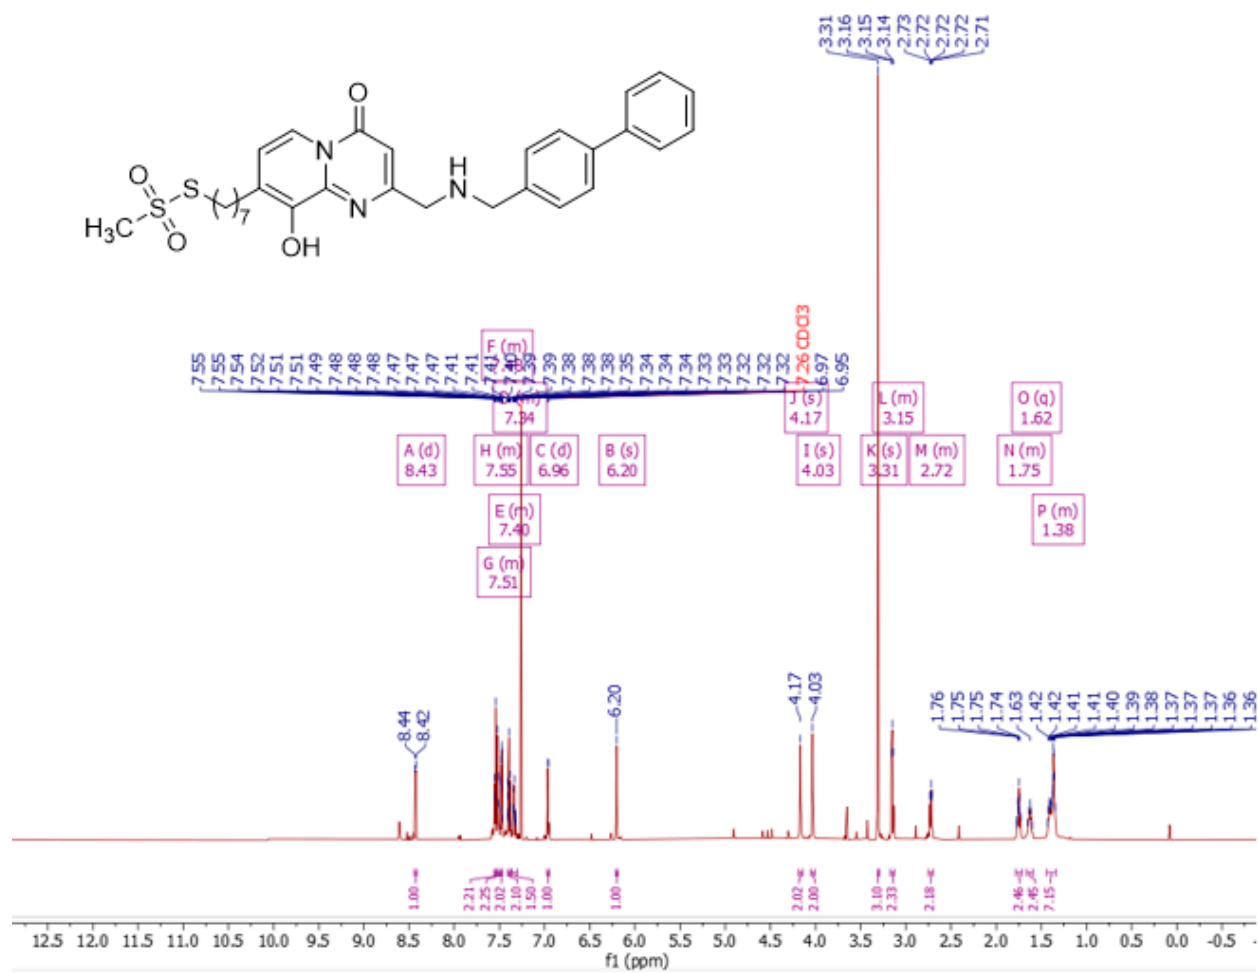

<sup>13</sup>C NMR of **84**

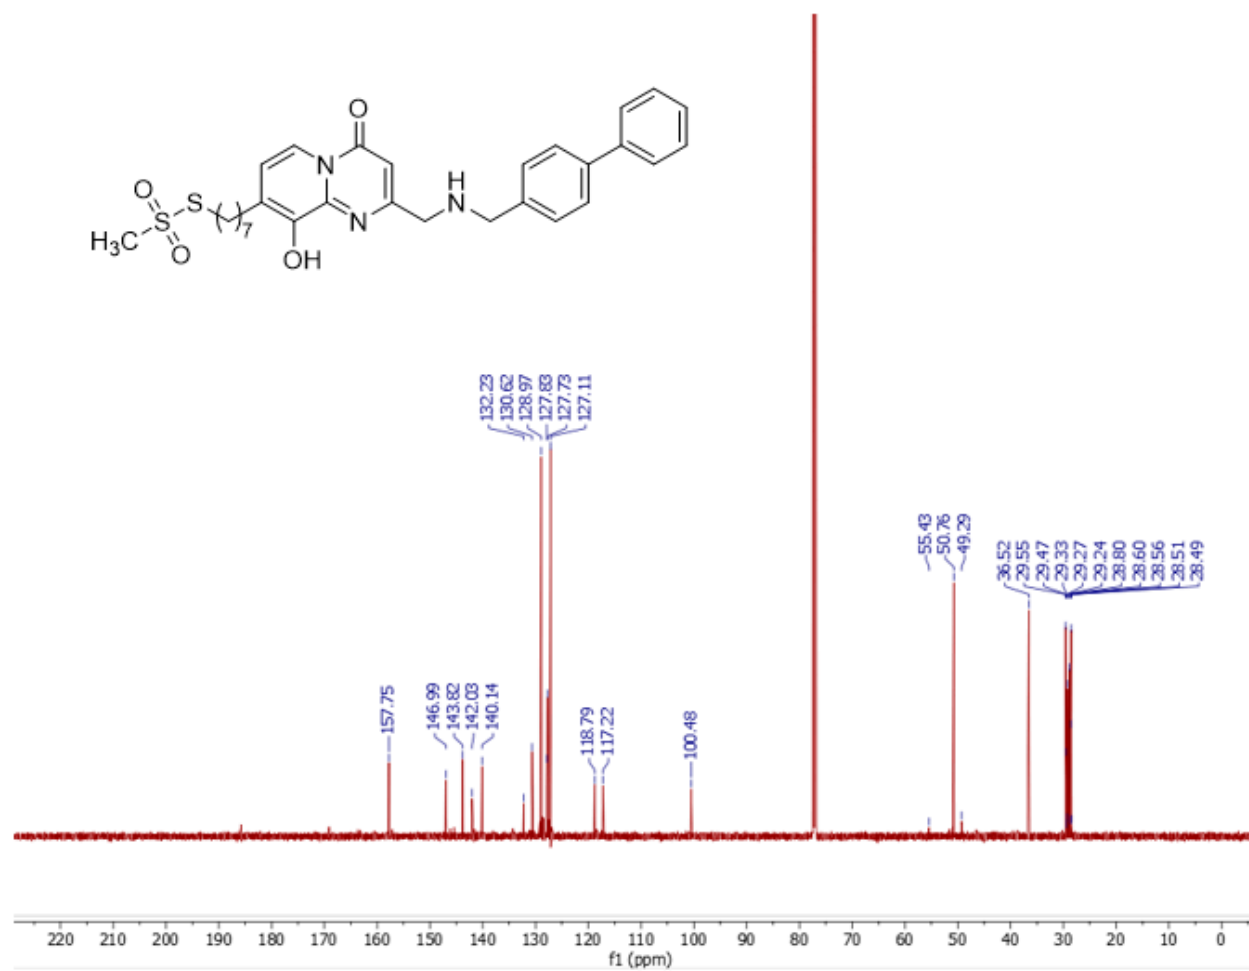

Supplement: s1 [file s1]
